# Supplementary material for: Asymmetric hydrogenation of trifluoromethyl ketones: application in the synthesis of Odanacatib and LX-1031
Source: Royal Society of Chemistry journal article supplement (doi:10.1039/d1qo00368b), 2021-01-01

## Asymmetric Hydrogenation of Trifluoromethyl Ketones: Application in the Synthesis of Odanacatib and LX-1031

Tiao-Zhen Zhu,<sup>a</sup> Pan-Lin Shao,<sup>\*a</sup> and Xumu Zhang<sup>\*b</sup>

<sup>a</sup>College of Innovation and Entrepreneurship, Southern University of Science and Technology, 1088 Xueyuan Road, Shenzhen 518055, Guangdong, China.

<sup>b</sup>Guangdong Provincial Key Laboratory of Catalysis, Department of Chemistry, Southern University of Science and Technology, 1088 Xueyuan Road, Shenzhen, 518055, China.

### Electronic Supplementary Information

| <b>Table of Contents</b>                                                                                              | page |
|-----------------------------------------------------------------------------------------------------------------------|------|
| I. General information                                                                                                | S2   |
| II. Experimental procedure and characterization of secondary trifluoromethyl ketones                                  | S3   |
| III. Representative procedure for asymmetric hydrogenation and characterization of secondary trifluoromethyl alcohols | S8   |
| IV. Applications of secondary trifluoromethyl alcohols                                                                | S28  |
| V. References                                                                                                         | S34  |
| VI. NMR spectra                                                                                                       | S36  |

## **I. General Information**

Unless otherwise mentioned, all experiments were carried out under an atmosphere of argon in a glovebox or using standard Schlenk techniques. Solvents were dried with standard procedures and degassed with N<sub>2</sub>. Flash column chromatography was performed using Tsingdao silica gel (60, particle size 200-300 mesh). <sup>1</sup>H, <sup>13</sup>C and <sup>19</sup>F NMR spectra were recorded on Bruker Ascend TM 400MHz (<sup>1</sup>H: 400 MHz, <sup>13</sup>C: 101 MHz, <sup>19</sup>F: 376 MHz). Chemical shifts (δ) for <sup>1</sup>H and <sup>13</sup>C NMR spectra were given in ppm and were referenced to residual solvent or TMS peaks. Enantioselective ratios were determined by chiral HPLC analysis using a chiral stationary phase on Agilent Technologies 1260 Infinity II instrument in comparison with the authentic racemates. Optical rotations were obtained on Rudolph Autopol I, serial number 35148. Exact ESI mass spectra were recorded on Orbitrap Fusion instrument.

## II. Experimental procedure and characterization of secondary trifluoromethyl ketones

### Scheme S1. General Preparation of fluorinated acetophenones

#### Method A:

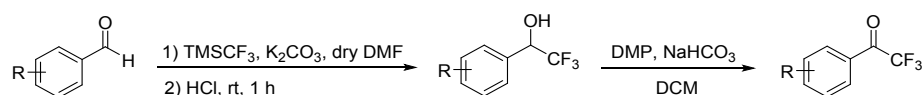

General procedure for the fluorinated acetophenones<sup>[1]</sup>: To a 100 mL flask was added aldehyde (8.0 mmol), and DMF (15 mL), and K<sub>2</sub>CO<sub>3</sub> (0.08 mmol), TMS-CF<sub>3</sub> (9.6 mmol) was added dropwise. Then the mixture was allowed to stir at rt for 1 h before HCl (1 M) was added, then the mixture was stirred at rt for another 1 h. After the reaction was finished, the reaction mixture was extracted with ethyl acetate (3 × 100 mL). The combined organic phase was dried with Na<sub>2</sub>SO<sub>4</sub> and evaporated in vacuum. Purification of the residue by silica gel (hexanes/EtOAc 10/1~4/1) afforded the desired fluorinated phenylethanols as a white solid.

To a solution of the fluorinated phenylethanols (5.0 mmol) in DCM, DMP (12.0 mmol) and NaHCO<sub>3</sub> (20 mmol) were added successively. The solution was allowed to stir at rt for 3 h. Then water was added and the obtained suspension was stirred for another 1 h. After the reaction was finished, the reaction mixture was extracted with DCM (3 × 20 mL). The combined organic phase was dried with Na<sub>2</sub>SO<sub>4</sub> and evaporated in vacuum. Purification of the residue by silica gel (hexanes/EtOAc 100/1~90/1) afforded the desired fluorinated acetophenones as a white solid.<sup>[2]</sup>

#### Method B:

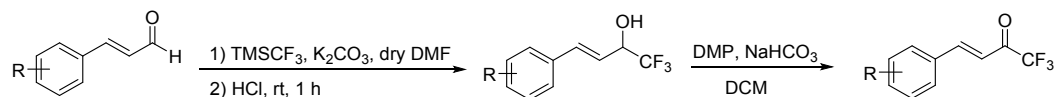

General procedure for the  $\alpha,\beta$ -unsaturated trifluoromethyl ketones<sup>[2]</sup>: To a 100 mL flask was added  $\alpha,\beta$ -unsaturated aldehyde (8.0 mmol), and DMF (20 mL), and K<sub>2</sub>CO<sub>3</sub> (0.08 mmol), TMS-CF<sub>3</sub> (9.6 mmol) was added dropwise. Then the mixture was allowed to stir at rt for 1 h before HCl (1 M) was added, then the mixture was stirred at rt for another 1 h. After the reaction was finished, the reaction mixture was extracted with ethyl acetate (3 × 100 mL). The combined organic phase was dried with Na<sub>2</sub>SO<sub>4</sub> and evaporated in vacuum. Purification of the residue by silica gel

(hexanes/EtOAc 10/1~4/1) afforded the desired  $\alpha,\beta$ -unsaturated trifluoromethyl alcohols as light yellow oil.

To a solution of the  $\alpha,\beta$ -unsaturated trifluoromethyl alcohols (5.0 mmol) in DCM, DMP (12.0 mmol) and  $\text{NaHCO}_3$  (20 mmol) were added successively. The solution was allowed to stir at rt for 3 h. Then water was added and the obtained suspension was stirred for another 1 h. After the reaction was finished, the reaction mixture was extracted with DCM ( $3 \times 20$  mL). The combined organic phase was dried with  $\text{Na}_2\text{SO}_4$  and evaporated in vacuum. Purification of the residue by silica gel (hexanes/EtOAc 100/1~90/1) afforded the desired  $\alpha,\beta$ -unsaturated trifluoromethyl ketones as a white solid.<sup>[2]</sup>

#### Method C:

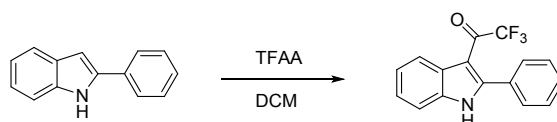

General procedure for the fluorinated indolinone<sup>[3]</sup>: To a 100 mL oven-dried flask under argon was added the indole (5.2 mmol), and dry DCM (10 mL), and under stirring the mixture was cooled to 0 °C. The perfluoro anhydride (20.8 mmol) was then added dropwise using a syringe. After the reaction was finished, the reaction mixture is then dropwise added to a stirred, ice-cold saturated  $\text{NaHCO}_3$  solution. Further DCM was added, the organic phases were separated, and the aqueous layer was extracted with DCM. The combined organic phase was dried with  $\text{Na}_2\text{SO}_4$  and evaporated in vacuum. Purification of the residue by silica gel (hexanes/EtOAc 20/1~2/1) afforded the desired fluorinated indolinone as a yellow solid.

#### Characterization data of substrates

##### 1-(4-(*tert*-butyl)phenyl)-2,2,2-trifluoroethan-1-one (1e)

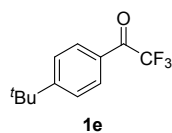

White solid, 86% yield.  $^1\text{H NMR}$  (400 MHz,  $\text{CDCl}_3$ )  $\delta$  8.08 – 7.92 (m, 2H), 7.65 – 7.45 (m, 2H), 1.36 (s, 9H).  $^{13}\text{C NMR}$  (151 MHz,  $\text{CDCl}_3$ )  $\delta$  180.1 (q,  $J = 34.5$  Hz), 159.8, 130.2, 127.3, 126.1, 116.8 (q,  $J = 291.3$  Hz), 35.5, 30.9.  $^{19}\text{F NMR}$  (376 MHz,  $\text{CDCl}_3$ )  $\delta$  -71.33.

##### 2,2,2-trifluoro-1-(naphthalen-2-yl)ethan-1-one (1m)

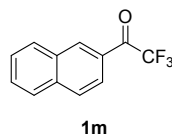

White solid, 84% yield.  $^1\text{H NMR}$  (400 MHz,  $\text{CDCl}_3$ )  $\delta$  8.62 (s, 1H), 8.07 (d,  $J =$

8.7 Hz, 1H), 8.01 (d,  $J = 8.1$  Hz, 1H), 7.95 (d,  $J = 8.7$  Hz, 1H), 7.90 (d,  $J = 8.1$  Hz, 1H), 7.69 (t,  $J = 7.5$  Hz, 1H), 7.61 (t,  $J = 7.2$  Hz, 1H).  $^{13}\text{C}$  NMR (151 MHz,  $\text{CDCl}_3$ )  $\delta$  180.5 (q,  $J = 35.0$  Hz), 136.5, 133.2 (d,  $J = 3.2$  Hz), 132.2, 130.2, 130.1, 129.1, 127.9, 127.4, 127.2, 124.2, 116.9 (q,  $J = 291.0$  Hz).  $^{19}\text{F}$  NMR (376 MHz,  $\text{CDCl}_3$ )  $\delta$  -70.73.

### 2,2,2-trifluoro-1-(naphthalen-1-yl)ethan-1-one (1n)

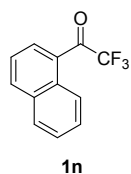

Light yellow oil, 83% yield.  $^1\text{H}$  NMR (400 MHz,  $\text{CDCl}_3$ )  $\delta$  8.78 (d,  $J = 8.7$  Hz, 1H), 8.12 (d,  $J = 7.4$  Hz, 1H), 8.00 (d,  $J = 8.2$  Hz, 1H), 7.79 (d,  $J = 8.1$  Hz, 1H), 7.59 (ddd,  $J = 8.6, 6.9, 1.5$  Hz, 1H), 7.50 (ddd,  $J = 8.1, 6.8, 1.2$  Hz, 1H), 7.43 (t,  $J = 7.8$  Hz, 1H).  $^{13}\text{C}$  NMR (101 MHz,  $\text{CDCl}_3$ )  $\delta$  182.2 (q,  $J = 33.8$  Hz), 136.1, 133.9, 131.6 (q,  $J = 4.0$  Hz), 131.1, 129.4, 128.9, 127.0, 126.1, 125.1, 124.0, 116.7 (q,  $J = 293.2$  Hz).  $^{19}\text{F}$  NMR (565 MHz,  $\text{CDCl}_3$ )  $\delta$  -70.15.

### 2,2,2-trifluoro-1-(2-phenyl-1H-indol-3-yl)ethan-1-one (1o)

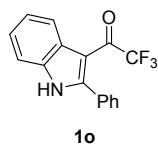

Yellow oil, 91% yield.  $^1\text{H}$  NMR (400 MHz,  $\text{CDCl}_3$ )  $\delta$  8.77 (s, 1H), 8.21 (d,  $J = 5.9$  Hz, 1H), 7.64 – 7.31 (m, 8H).  $^{13}\text{C}$  NMR (101 MHz,  $\text{CDCl}_3$ )  $\delta$  177.0 (q,  $J = 36.5$  Hz), 148.1, 135.1, 131.3, 130.1, 129.5, 128.4, 126.9, 124.4, 123.6, 121.8 (q,  $J = 2.5$  Hz), 116.5 (q,  $J = 290.3$  Hz), 111.4, 108.4.  $^{19}\text{F}$  NMR (376 MHz,  $\text{CDCl}_3$ )  $\delta$  -72.71. HRMS (ESI) calcd. for  $\text{C}_{11}\text{H}_9\text{F}_3\text{O}_2$  [M-H] $^-$ : 288.0642, Found: 288.0640.

### (E)-1,1,1-trifluoro-4-phenylbut-3-en-2-one (1t)

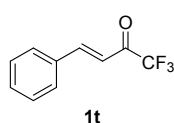

Light yellow oil, 86% yield.  $^1\text{H}$  NMR (400 MHz,  $\text{CDCl}_3$ )  $\delta$  7.97 (d,  $J = 16.0$  Hz, 1H), 7.67 – 7.60 (m, 2H), 7.54 – 7.39 (m, 3H), 7.02 (d,  $J = 15.9$  Hz, 1H).  $^{13}\text{C}$  NMR (101 MHz,  $\text{CDCl}_3$ )  $\delta$  180.0 (q,  $J = 35.3$  Hz), 150.1, 133.3, 132.3, 129.2, 116.6, 116.4 (q,  $J = 290.6$  Hz).  $^{19}\text{F}$  NMR (376 MHz,  $\text{CDCl}_3$ )  $\delta$  -77.60. HRMS (ESI) calcd. for  $\text{C}_{10}\text{H}_7\text{F}_3\text{O}$  [M-H] $^-$ : 199.0376, Found: 199.0368.

### (E)-1,1,1-trifluoro-4-(p-tolyl)but-3-en-2-one (1u)

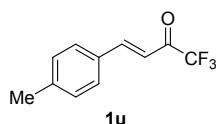

Light yellow solid, 67% yield.  $^1\text{H}$  NMR (400 MHz,  $\text{CDCl}_3$ )  $\delta$  7.95 (d,  $J = 15.9$  Hz, 1H), 7.54 (d,  $J = 8.1$  Hz, 2H), 7.34 – 7.17 (m, 2H), 6.97 (d,  $J = 15.9$  Hz, 1H), 2.41 (s, 3H).  $^{13}\text{C}$  NMR (101 MHz,  $\text{CDCl}_3$ )  $\delta$  180.0 (q,  $J = 34.9$  Hz),

150.2, 143.4, 130.7, 123.0, 129.3, 116.4 (q,  $J = 291.2$  Hz), 115.6, 21.7.  $^{19}\text{F}$  NMR (565 MHz,  $\text{CDCl}_3$ )  $\delta$  -77.54.

**(E)-4-(4-chlorophenyl)-1,1,1-trifluorobut-3-en-2-one (1v)**

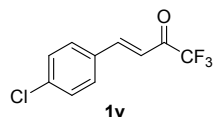

White solid, 90% yield.  $^1\text{H}$  NMR (600 MHz,  $\text{CDCl}_3$ )  $\delta$  7.91 (d,  $J = 16.0$  Hz, 1H), 7.58 (d,  $J = 8.4$  Hz, 2H), 7.43 (d,  $J = 8.4$  Hz, 2H), 6.99 (d,  $J = 16.0$  Hz, 1H).  $^{13}\text{C}$  NMR (151 MHz,  $\text{CDCl}_3$ )  $\delta$  179.8 (q,  $J = 35.0$  Hz), 148.5, 138.5, 131.8, 130.3, 129.6, 117.0, 116.3 (q,  $J = 290.2$  Hz).  $^{19}\text{F}$  NMR (565 MHz,  $\text{CDCl}_3$ )  $\delta$  -77.65.

**(E)-4-(4-bromophenyl)-1,1,1-trifluorobut-3-en-2-one (1w)**

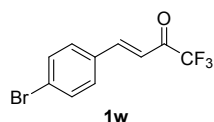

Light yellow solid, 85% yield.  $^1\text{H}$  NMR (400 MHz,  $\text{CDCl}_3$ )  $\delta$  7.90 (d,  $J = 16.0$  Hz, 1H), 7.60 (d,  $J = 8.3$  Hz, 2H), 7.50 (d,  $J = 8.3$  Hz, 2H), 7.00 (d,  $J = 15.9$  Hz, 1H).  $^{13}\text{C}$  NMR (101 MHz,  $\text{CDCl}_3$ )  $\delta$  179.8 (q,  $J = 35.6$  Hz), 148.6, 132.5, 132.2, 130.4, 126.9, 117.1, 116.3 (q,  $J = 290.8$  Hz).  $^{19}\text{F}$  NMR (376 MHz,  $\text{CDCl}_3$ )  $\delta$  -77.65. HRMS (ESI) calcd. for  $\text{C}_{10}\text{H}_6\text{BrF}_3\text{O}$  [M-H] $^-$ : 276.9481, Found: 276.9478.

**(E)-1,1,1-trifluoro-4-(3-methoxyphenyl)but-3-en-2-one (1x)**

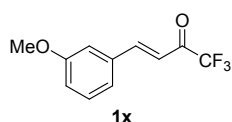

Light yellow oil, 76% yield.  $^1\text{H}$  NMR (400 MHz,  $\text{CDCl}_3$ )  $\delta$  7.93 (d,  $J = 16.0$  Hz, 1H), 7.36 (t,  $J = 7.9$  Hz, 1H), 7.28 – 7.21 (m, 1H), 7.13 (t,  $J = 2.1$  Hz, 1H), 7.05 (ddd,  $J = 8.3, 2.6, 0.9$  Hz, 1H), 6.99 (dd,  $J = 16.0, 1.0$  Hz, 1H), 3.86 (s, 3H).  $^{13}\text{C}$  NMR (101 MHz,  $\text{CDCl}_3$ )  $\delta$  178.0 (q,  $J = 35.0$  Hz), 160.1, 150.1, 134.6, 130.2, 122.0, 118.3, 116.9, 116.4 (q,  $J = 290.7$  Hz), 113.8, 55.4.  $^{19}\text{F}$  NMR (376 MHz,  $\text{CDCl}_3$ )  $\delta$  -77.56. HRMS (ESI) calcd. for  $\text{C}_{11}\text{H}_9\text{F}_3\text{O}_2$  [M-H] $^-$ : 229.0482, Found: 229.0476.

**(E)-1,1,1-trifluoro-4-(2-methoxyphenyl)but-3-en-2-one (1y)**

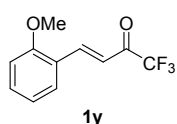

Yellow oil, 67% yield.  $^1\text{H}$  NMR (600 MHz,  $\text{CDCl}_3$ )  $\delta$  8.28 (d,  $J = 16.0$  Hz, 1H), 7.59 (d,  $J = 7.5$  Hz, 1H), 7.45 (t,  $J = 7.7$  Hz, 1H), 7.14 (d,  $J = 16.0$  Hz, 1H), 7.00 (t,  $J = 7.4$  Hz, 1H), 6.96 (d,  $J = 8.3$  Hz, 1H), 3.92 (s, 3H).  $^{13}\text{C}$  NMR (101 MHz,  $\text{CDCl}_3$ )  $\delta$  180.5 (q,  $J = 34.8$  Hz), 159.7, 145.8, 133.8, 130.2, 122.4, 120.9, 117.0, 116.6 (q,  $J = 290.7$  Hz), 111.5, 55.6.  $^{19}\text{F}$  NMR (376 MHz,  $\text{CDCl}_3$ )  $\delta$  -77.63. HRMS (ESI) calcd. for  $\text{C}_{11}\text{H}_9\text{F}_3\text{O}_2$  [M-H] $^-$ : 229.0482, Found: 229.0476.

**(E)-1,1,1-trifluoro-3-methyl-4-phenylbut-3-en-2-one (1z)**

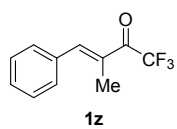

Yellow oil, 83% yield.  $^1\text{H NMR}$  (400 MHz,  $\text{CDCl}_3$ )  $\delta$  7.74 (s, 1H), 7.60 – 7.34 (m, 5H), 2.17 (s, 3H).  $^{13}\text{C NMR}$  (101 MHz,  $\text{CDCl}_3$ )  $\delta$  182.4 (dd,  $J = 33.3, 15.2$  Hz), 145.9 (dt,  $J = 15.2, 3.5$  Hz), 134.7 (d,  $J = 15.5$  Hz), 131.0 (d,  $J = 15.2$  Hz), 130.4 (d,  $J = 15.2$  Hz), 130.0 (d,  $J = 15.1$  Hz), 128.8 (d,  $J = 15.2$  Hz), 116.9 (qd,  $J = 291.8, 15.1$  Hz), 13.4 (d,  $J = 15.1$  Hz).  $^{19}\text{F NMR}$  (376 MHz,  $\text{CDCl}_3$ )  $\delta$  -68.91.

### III. Representative procedure for asymmetric hydrogenation and characterization of secondary trifluoromethyl alcohols

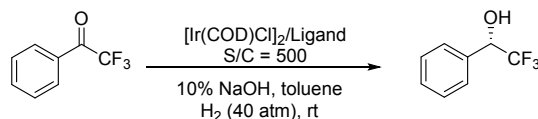

**General procedure for S/C = 500<sup>[4]</sup>:** To a 4.0 mL vial was added the catalyst precursor [Ir(COD)Cl]<sub>2</sub> (6.7 mg, 9.97 μmol, 1.0 equiv), (*S<sub>C</sub>*, *R<sub>C</sub>*, *S<sub>C</sub>*, *R<sub>FC</sub>*)-*f*-amphol **L2** (16.2 mg, 21.04 μmol, 2.1 equiv) and anhydrous *i*PrOH (2.0 mL) in the argon-filled glovebox. The mixture was stirred for 2.0 h at 25 °C. The resulting orange solution (20 μL) was transferred by syringe into a vial (5.0 mL) charged with substrate (0.2 mmol), NaOH (0.8 mg, 0.02 mmol) and anhydrous toluene (1.0 mL). The vial was transferred to an autoclave, which was then charged with H<sub>2</sub> (40 atm) and stirred at rt for 16 h. The hydrogen gas was released slowly in a well-ventilated hood, the yield of the reaction was first determined by quantitative <sup>19</sup>F{<sup>1</sup>H} NMR analysis. Then the solution was concentrated and purified by flash chromatography on silica gel (CH<sub>2</sub>Cl<sub>2</sub>/MeOH, 10:1) to afford the product. Pure product was afforded after column chromatography (hexanes/EtOAc 10/1~5/1).

#### (*S*)-2, 2, 2-trifluoro-1-phenylethanol (**2a**)

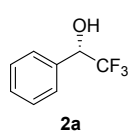

Colourless oil, >99% yield. <sup>1</sup>H NMR (400 MHz, CDCl<sub>3</sub>) δ 7.41 – 7.29 (m, 5H), 4.84 (q, *J* = 6.8 Hz, 1H), 3.50 (s, 1H). <sup>13</sup>C NMR (101 MHz, CDCl<sub>3</sub>) δ 133.9, 129.5, 128.6, 127.4, 124.2 (q, *J* = 281.8 Hz), 72.7 (q, *J* = 32.2 Hz). <sup>19</sup>F NMR (376 MHz, CDCl<sub>3</sub>) δ -78.20.

**Optical Rotation:** [ $\alpha$ ]<sub>D</sub><sup>25</sup> = +21.7 (c = 1.0, CHCl<sub>3</sub>) (Lit:<sup>[5]</sup> [ $\alpha$ ]<sub>D</sub><sup>25</sup> = +8.33 (c = 0.5, CHCl<sub>3</sub>, *S*, 51% ee). The absolute configuration was determined to be (*S*). 98% ee. (HPLC condition: Daicel Chiralcel OJ-H Column, <sup>n</sup>hexane/*i*PrOH = 95:5, flow rate = 1.0 mL/min, T = 25 °C, wavelength = 210 nm, t<sub>R1</sub> = 17.8 min for minor isomer, t<sub>R2</sub> = 23.8 min for major isomer).



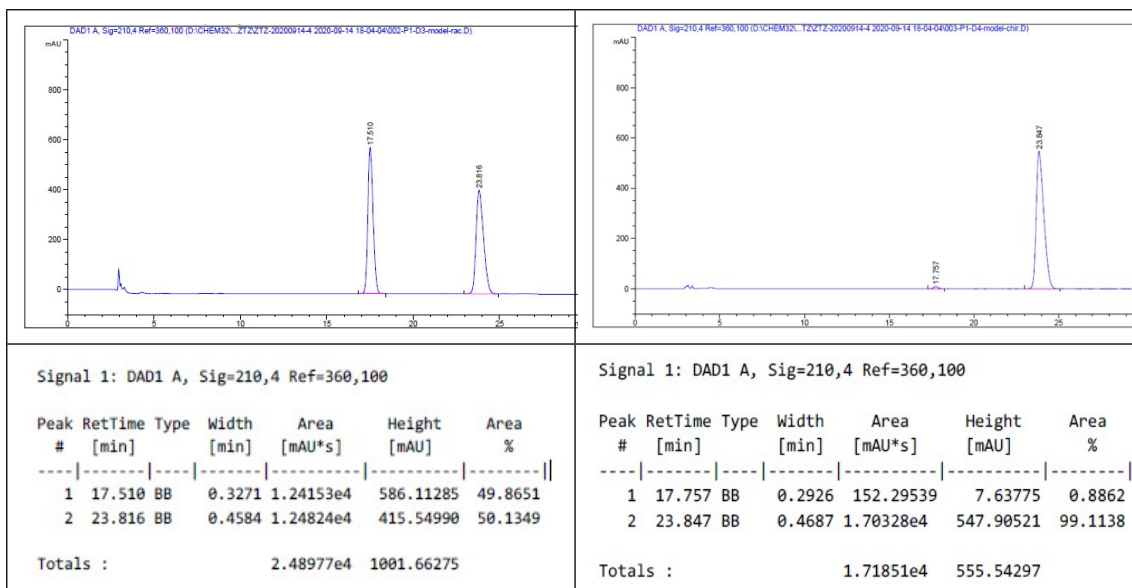

**(S)-2,2,2-trifluoro-1-(p-toly)ethan-1-ol (2b)**

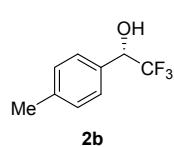

Colourless oil, 91% yield. <sup>1</sup>H NMR (400 MHz, CDCl<sub>3</sub>) δ 7.36 (d, *J* = 7.9 Hz, 2H), 7.22 (d, *J* = 7.9 Hz, 2H), 4.98 (qd, *J* = 6.7, 4.0 Hz, 1H), 2.63 (d, *J* = 4.2 Hz, 1H), 2.37 (s, 3H). <sup>13</sup>C NMR (101 MHz, CDCl<sub>3</sub>) δ 139.6, 131.1, 129.3, 127.3, 124.3 (q, *J* = 282.0 Hz), 72.7 (q, *J* = 32.0 Hz), 21.2 (d, *J* = 4.0 Hz). <sup>19</sup>F NMR (376 MHz, CDCl<sub>3</sub>) δ -78.41.

**Optical Rotation:**  $[\alpha]_D^{20} = +28.7$  (c = 1.0, CHCl<sub>3</sub>) (Lit:  $^{[6]}[\alpha]_D^{25} = +28.0$  (c = 1.6, CHCl<sub>3</sub>, *S*, 86% ee). The absolute configuration was determined to be (*S*). 99% ee. (HPLC condition: Daicel Chiralcel OJ-H Column, <sup>n</sup>hexane/<sup>i</sup>PrOH = 95:5, flow rate = 1.0 ml/min, T = 25 °C, wavelength = 210 nm, t<sub>R1</sub> = 14.7 min for minor isomer, t<sub>R2</sub> = 20.0 min for major isomer).

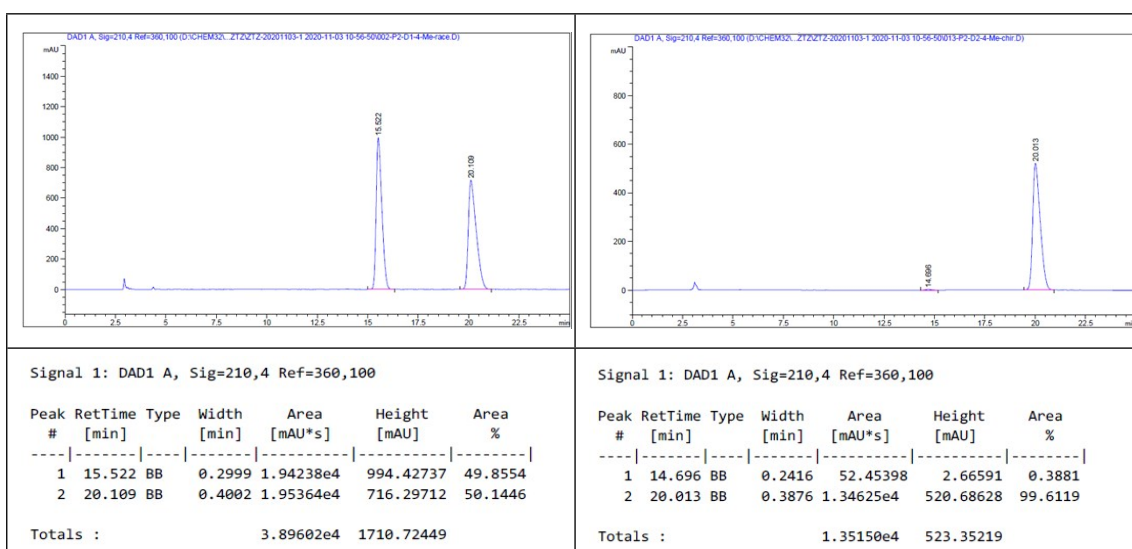

**(S)-2,2,2-trifluoro-1-(4-methoxyphenyl)ethan-1-ol (2c)**

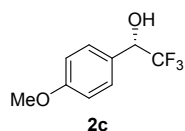

Colourless oil, >99% yield.  $^1\text{H NMR}$  (400 MHz,  $\text{CDCl}_3$ )  $\delta$  7.48 – 7.30 (m, 2H), 7.07 – 6.79 (m, 2H), 4.95 (q,  $J = 6.7$  Hz, 1H), 3.82 (s, 3H), 2.58 (s, 1H).  $^{13}\text{C NMR}$  (101 MHz,  $\text{CDCl}_3$ )  $\delta$  160.4, 128.8, 126.1, 124.3 (q,  $J = 282.3$  Hz), 114.0, 72.4 (q,  $J = 32.0$  Hz), 55.3.  $^{19}\text{F NMR}$  (565 MHz,  $\text{CDCl}_3$ )  $\delta$  -78.55.

**Optical Rotation:**  $[\alpha]^{25}_{\text{D}} = +30.2$  ( $c = 1.0$ ,  $\text{CHCl}_3$ ). The absolute configuration was assigned to be (**S**) by analogy to **2a**. 95% ee. (HPLC condition: Daicel Chiralcel OJ-H Column,  $n^{\text{hexane}}/i^{\text{PrOH}} = 95:5$ , flow rate = 1.0 ml/min,  $T = 25$  °C, wavelength = 230 nm,  $t_{\text{R}1} = 35.2$  min for minor isomer,  $t_{\text{R}2} = 38.4$  min for major isomer).

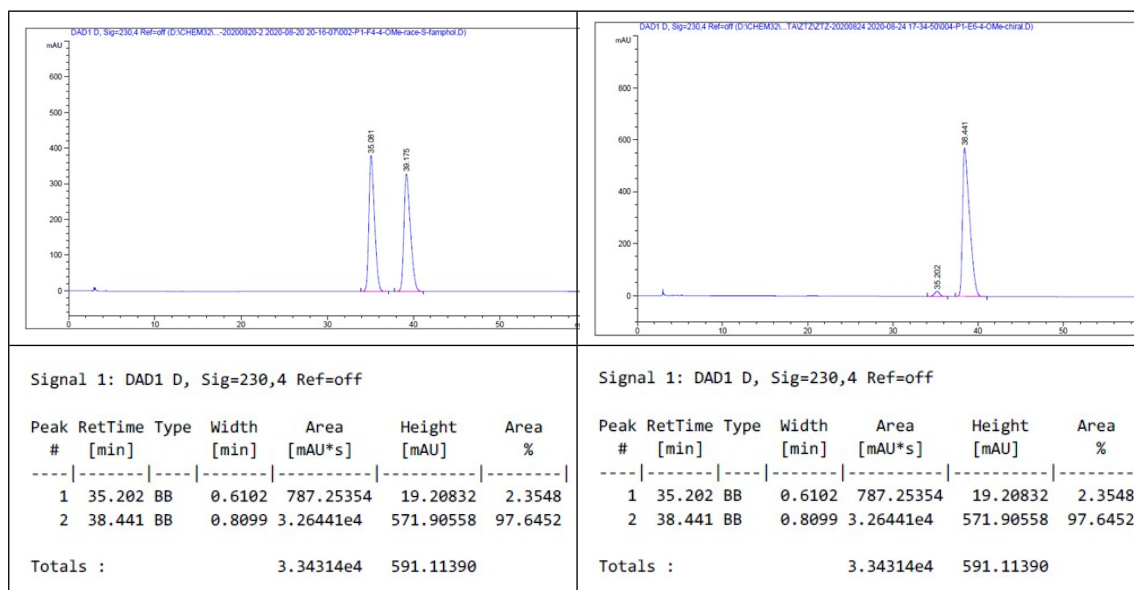

### (**S**)-1-(4-(dimethylamino)phenyl)-2,2,2-trifluoroethan-1-ol (**2d**)

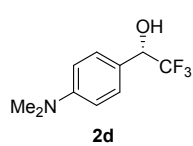

White solid, 40.3 mg, 92% yield.  $^1\text{H NMR}$  (400 MHz,  $\text{CDCl}_3$ )  $\delta$  7.29 (d,  $J = 8.5$  Hz, 2H), 6.70 (d,  $J = 8.8$  Hz, 2H), 4.85 (q,  $J = 6.8$  Hz, 1H), 2.95 (s, 6H).  $^{13}\text{C NMR}$  (101 MHz,  $\text{CDCl}_3$ )  $\delta$  151.2, 128.4, 124.5 (q,  $J = 282.2$  Hz), 121.5, 112.2, 72.7 (q,  $J = 32.1$  Hz), 40.4.  $^{19}\text{F NMR}$  (376 MHz,  $\text{CDCl}_3$ )  $\delta$  -78.35. **HRMS (ESI)** calcd. for  $\text{C}_{10}\text{H}_{12}\text{F}_3\text{NO}$   $[\text{M}+\text{H}]^+$ : 220.0944, Found: 220.0945.

**Optical Rotation:**  $[\alpha]^{25}_{\text{D}} = +30.5$  ( $c = 1.0$ ,  $\text{CHCl}_3$ ). The absolute configuration was assigned to be (**S**) by analogy to **2a**. 97% ee. (HPLC condition: Daicel Chiralcel AS-H Column,  $n^{\text{hexane}}/i^{\text{PrOH}} = 95:5$ , flow rate = 1.0 ml/min,  $T = 25$  °C, wavelength = 210 nm,  $t_{\text{R}1} = 9.8$  min for major isomer,  $t_{\text{R}2} = 14.3$  min for minor isomer).

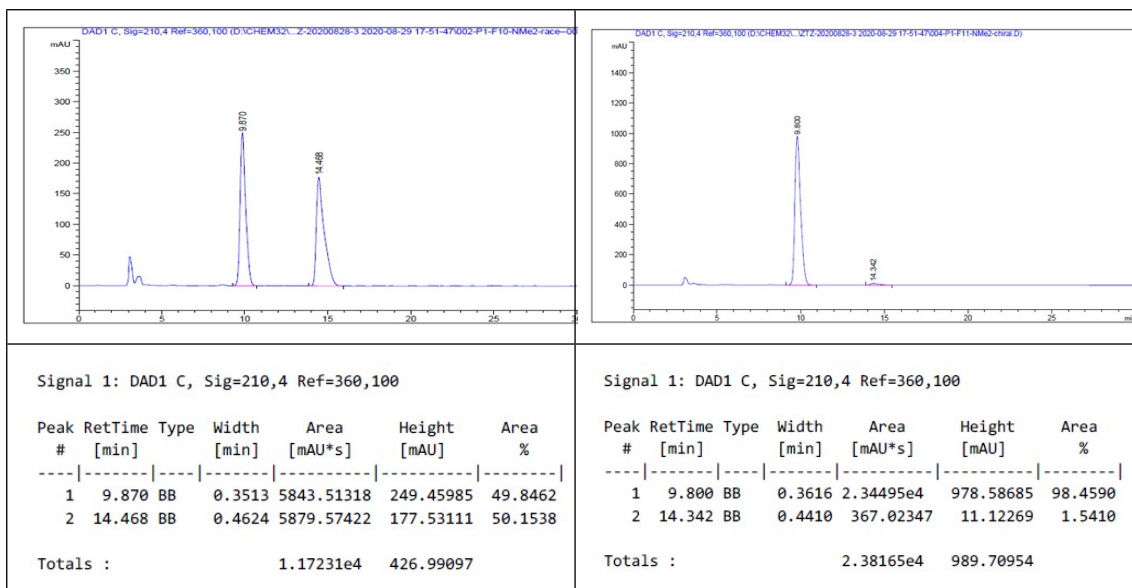

**(S)-1-(4-(*tert*-butyl)phenyl)-2,2,2-trifluoroethan-1-ol (2e)**

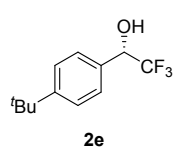

White solid, >99% yield. <sup>1</sup>H NMR (600 MHz, CDCl<sub>3</sub>) δ 7.38 – 7.29 (m, 4H), 4.90 (q, *J* = 6.8 Hz, 1H), 2.49 (s, 1H), 1.25 (s, 9H). <sup>13</sup>C NMR (101 MHz, CDCl<sub>3</sub>) δ 152.7, 131.0, 127.2, 125.6, 124.3(q, *J* = 282.0 Hz), 72.7(q, *J* = 32.0 Hz), 34.7, 31.2. <sup>19</sup>F NMR (565 MHz, CDCl<sub>3</sub>) δ -78.27.

**Optical Rotation:** [ $\alpha$ ]<sub>D</sub><sup>20</sup> = +19.1 (c = 1.0, CHCl<sub>3</sub>). The absolute configuration was assigned to be (*S*) by analogy to **2a**. 97% ee. (HPLC condition: Daicel Chiralcel OJ-H Column, <sup>n</sup>hexane/<sup>i</sup>PrOH = 97/3, flow rate = 1.0 mL/min, T = 25 °C, wavelength = 210 nm, t<sub>R1</sub> = 11.0 min for minor isomer, t<sub>R2</sub> = 14.2 min for major isomer).

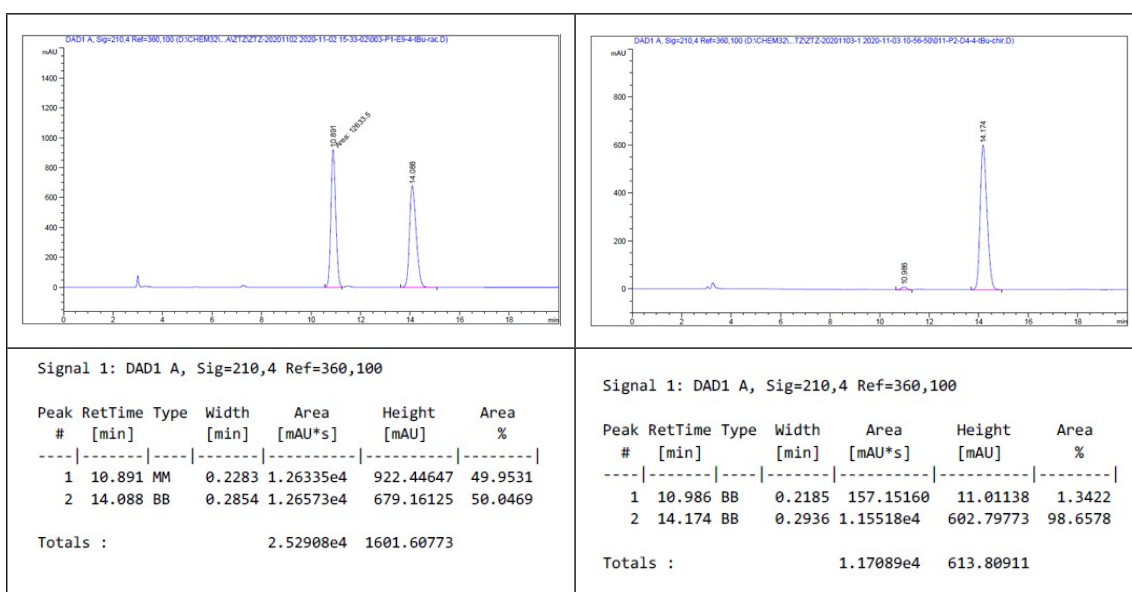

**(S)-2,2,2-trifluoro-1-(4-fluorophenyl)ethan-1-ol (2f)**

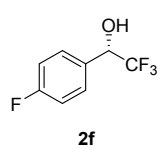

Colourless oil, >99% yield.  $^1\text{H NMR}$  (400 MHz,  $\text{CDCl}_3$ )  $\delta$  7.46 (dd,  $J = 8.5, 5.2$  Hz, 2H), 7.15 – 7.04 (m, 2H), 5.01 (q,  $J = 6.6$  Hz, 1H), 2.81 (s, 1H).  $^{13}\text{C NMR}$  (151 MHz,  $\text{CDCl}_3$ )  $\delta$  163.4 (d,  $J = 248.5$  Hz), 129.8, 129.3 (d,  $J = 8.5$  Hz), 124.1 (q,  $J = 281.5$  Hz), 115.7 (d,  $J = 21.8$  Hz), 72.1 (q,  $J = 32.4$  Hz).  $^{19}\text{F NMR}$  (376 MHz,  $\text{CDCl}_3$ )  $\delta$  -78.64, -111.86. **HRMS (ESI)** calcd. for  $\text{C}_8\text{H}_6\text{F}_4\text{O}$  [M-H] $^-$ : 193.0282, Found: 193.0274.

**Optical Rotation:**  $[\alpha]_D^{20} = +22.4$  ( $c = 1.0$ ,  $\text{CHCl}_3$ ). The absolute configuration was assigned to be (**S**) by analogy to **2a**. 96% ee. (HPLC condition: Daicel Chiralcel OJ-H Column,  $n$ hexane/ $i$ PrOH = 95/5, flow rate = 1.0 mL/min,  $T = 25$  °C, wavelength = 210 nm,  $t_{R1} = 13.5$  min for minor isomer,  $t_{R2} = 16.3$  min for major isomer).

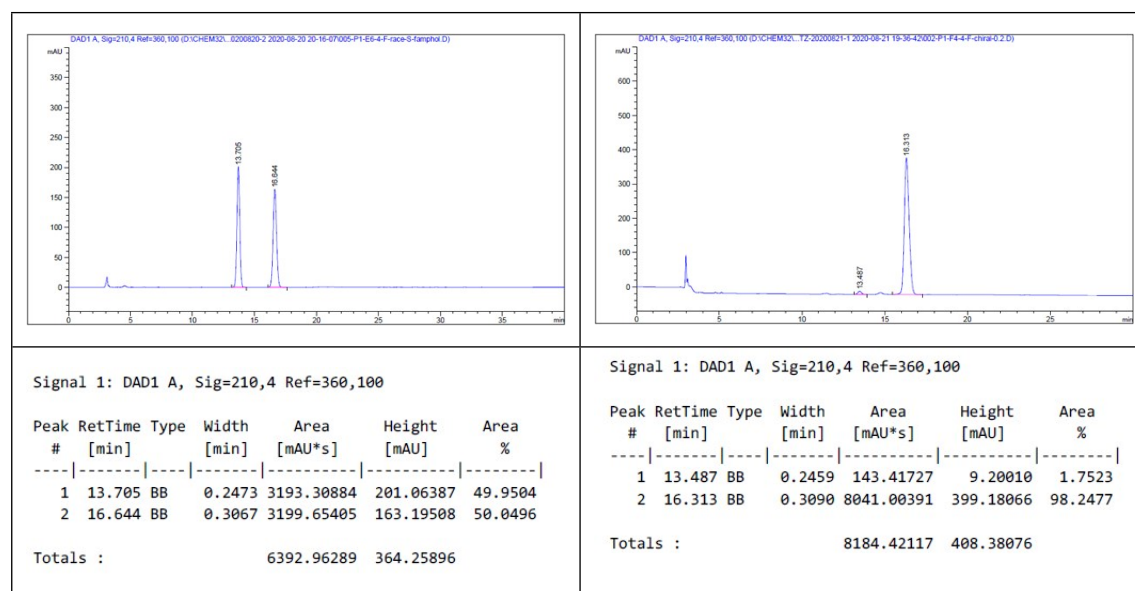

**(S)-1-(4-chlorophenyl)-2,2,2-trifluoroethan-1-ol (2g)**

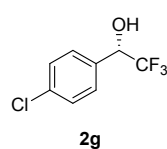

Colourless oil, >99% yield.  $^1\text{H NMR}$  (400 MHz,  $\text{CDCl}_3$ )  $\delta$  7.49 – 7.30 (m, 4H), 5.02 (q,  $J = 6.2$  Hz, 1H), 2.60 (s, 1H).  $^{13}\text{C NMR}$  (151 MHz,  $\text{CDCl}_3$ )  $\delta$  135.6, 132.2, 128.9, 128.8, 124.0 (q,  $J = 281.4$  Hz), 72.2 (q,  $J = 32.6$  Hz).  $^{19}\text{F NMR}$  (376 MHz,  $\text{CDCl}_3$ )  $\delta$  -78.55. **HRMS (ESI)** calcd. for  $\text{C}_8\text{H}_6\text{ClF}_3\text{O}$  [M+HCOO] $^-$ : 255.0041, Found: 255.0038.

**Optical Rotation:**  $[\alpha]_D^{20} = +25.4$  ( $c = 1.0$ ,  $\text{CHCl}_3$ ) (Lit:<sup>[7]</sup>  $[\alpha]_D^{20} = +26.1$  ( $c = 1.0$ ,  $\text{CHCl}_3$ , *S*, 98.7% ee). The absolute configuration was determined to be (**S**). 97% ee. (HPLC condition: Daicel Chiralcel OJ-H Column,  $n$ hexane/ $i$ PrOH = 95/5, flow rate = 1.0 mL/min,  $T = 25$  °C, wavelength = 230 nm,  $t_{R1} = 11.9$  min for minor isomer,  $t_{R2} = 14.4$  min for major isomer).

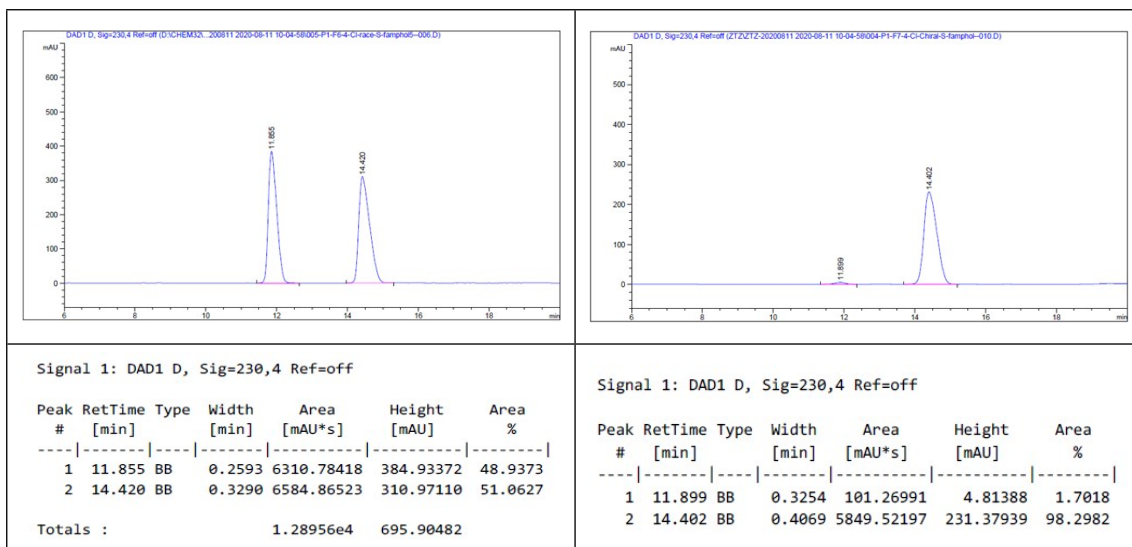

**(S)-1-(4-bromophenyl)-2,2,2-trifluoroethan-1-ol (2h)**

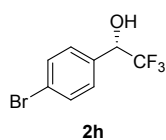

White solid, >99% yield. <sup>1</sup>H NMR (400 MHz, CDCl<sub>3</sub>) δ 7.70 – 7.43 (m, 2H), 7.30 (d, *J* = 8.2 Hz, 2H), 4.93 (q, *J* = 6.6 Hz, 1H), 3.17 (s, 1H). <sup>13</sup>C NMR (101 MHz, CDCl<sub>3</sub>) δ 132.8, 131.9, 129.1, 124.0 (q, *J* = 281.9 Hz), 123.8, 72.2 (q, *J* = 32.3 Hz).

<sup>19</sup>F NMR (376 MHz, CDCl<sub>3</sub>) δ -78.42. HRMS (ESI) calcd. for C<sub>8</sub>H<sub>6</sub>BrF<sub>3</sub>O [M+HCOO]<sup>-</sup>: 298.9536, Found: 298.9535.

**Optical Rotation:** [α]<sub>D</sub><sup>20</sup> = +18.1 (c = 1.0, CHCl<sub>3</sub>). The absolute configuration was assigned to be (**S**) by analogy to **2a**. 97% ee. (HPLC condition: Daicel Chiralcel OJ-H Column, <sup>n</sup>hexane/<sup>i</sup>PrOH = 95/5, flow rate = 1.0 mL/min, T = 25 °C, wavelength = 210 nm, t<sub>R1</sub> = 13.4 min for minor isomer, t<sub>R2</sub> = 16.8 min for major isomer).

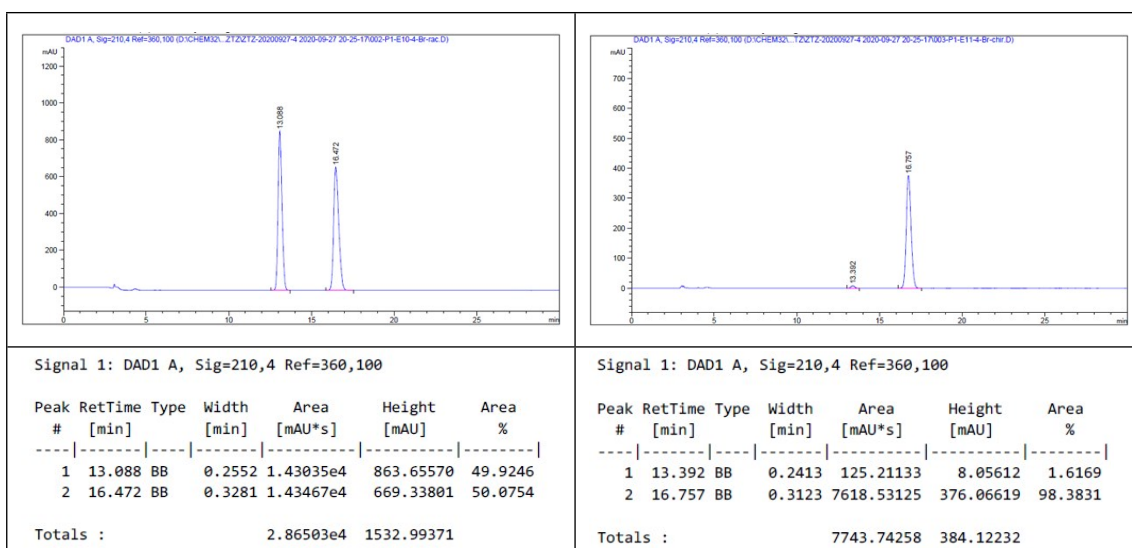

**(S)-2,2,2-trifluoro-1-(*m*-tolyl)ethan-1-ol (2i)**

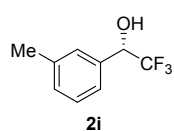

Colourless oil, >99% yield.  $^1\text{H NMR}$  (400 MHz,  $\text{CDCl}_3$ )  $\delta$  7.39 – 7.04 (m, 4H), 4.94 (q,  $J = 6.5$  Hz, 1H), 2.68 (s, 1H), 2.37 (s, 3H).  $^{13}\text{C NMR}$  (101 MHz,  $\text{CDCl}_3$ )  $\delta$  138.5, 133.9, 130.3, 128.5, 128.0, 124.5, 124.3 (q,  $J = 282.0$  Hz), 72.9 (q,  $J = 32.0$  Hz), 21.3.  $^{19}\text{F NMR}$  (376 MHz,  $\text{CDCl}_3$ )  $\delta$  -78.25. **HRMS (ESI)** calcd. for  $\text{C}_9\text{H}_9\text{F}_3\text{O}$  [M-H] $^-$ : 189.0533, Found: 189.0525.

**Optical Rotation:**  $[\alpha]_D^{20} = +23.3$  ( $c = 1.0$ ,  $\text{CHCl}_3$ ). The absolute configuration was assigned to be (**S**) by analogy to **2a**. 99% ee. (HPLC condition: Daicel Chiralcel OJ-H Column,  $n$ hexane/ $i$ PrOH = 95/5, flow rate = 1.0 mL/min,  $T = 25$  °C, wavelength = 210 nm,  $t_{R1} = 13.4$  min for minor isomer,  $t_{R2} = 15.6$  min for major isomer).

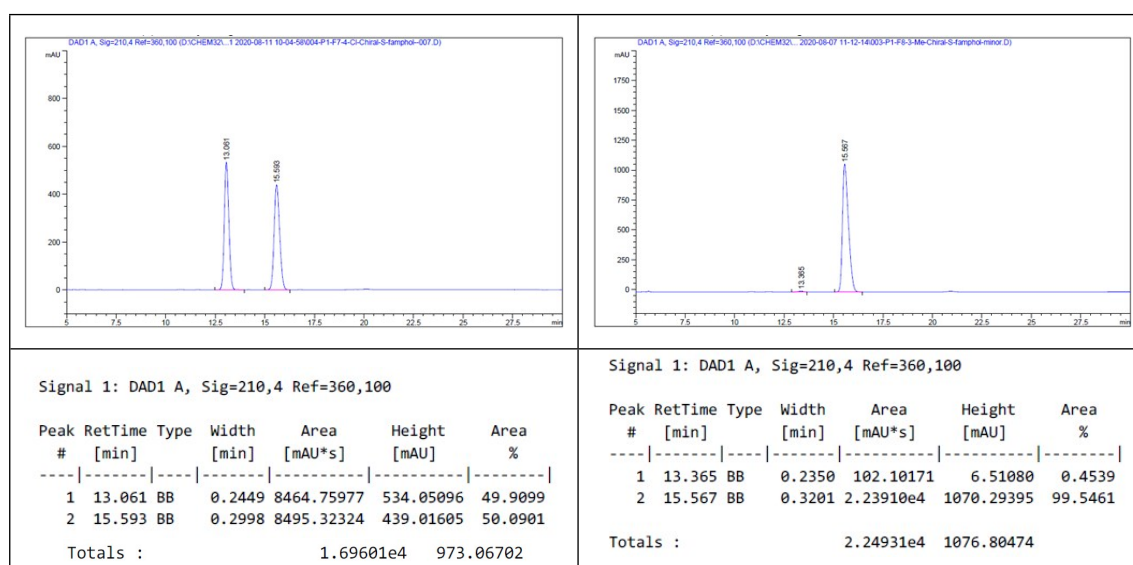

### (**S**)-2,2,2-trifluoro-1-(3-fluorophenyl)ethan-1-ol (**2j**)

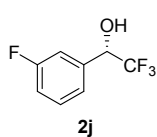

Colourless oil, >99% yield.  $^1\text{H NMR}$  (400 MHz,  $\text{CDCl}_3$ )  $\delta$  7.38 (td,  $J = 8.2, 6.0$  Hz, H), 7.30 – 7.16 (m, 2H), 7.17 – 7.03 (m, 1H), 5.02 (qd,  $J = 6.5, 3.9$  Hz, 1H), 2.79 (d,  $J = 4.2$  Hz, 1H).  $^{13}\text{C NMR}$  (151 MHz,  $\text{CDCl}_3$ )  $\delta$  162.8 (d,  $J = 246.4$  Hz), 136.2 (d,  $J = 7.6$  Hz), 130.2 (d,  $J = 7.8$  Hz), 124.0 (q,  $J = 282.2$  Hz), 123.1 (d,  $J = 3.0$  Hz), 116.5 (d,  $J = 20.8$  Hz), 114.5 (d,  $J = 23.4$  Hz), 72.3 (t,  $J = 32.2$  Hz).  $^{19}\text{F NMR}$  (376 MHz,  $\text{CDCl}_3$ )  $\delta$  -78.41, -112.12. **HRMS (ESI)** calcd. for  $\text{C}_8\text{H}_6\text{F}_4\text{O}$  [M-H] $^-$ : 193.0282, Found: 193.0273.

**Optical Rotation:**  $[\alpha]_D^{20} = +14.4$  ( $c = 1.0$ ,  $\text{CHCl}_3$ ). The absolute configuration was assigned to be (**S**) by analogy to **2a**. 96% ee. (HPLC condition: Daicel Chiralcel OJ-H Column,  $n$ hexane/ $i$ PrOH = 95/5, flow rate = 1.0 mL/min,  $T = 25$  °C, wavelength = 210 nm,  $t_{R1} = 11.2$  min for minor isomer,  $t_{R2} = 12.1$  min for major isomer).

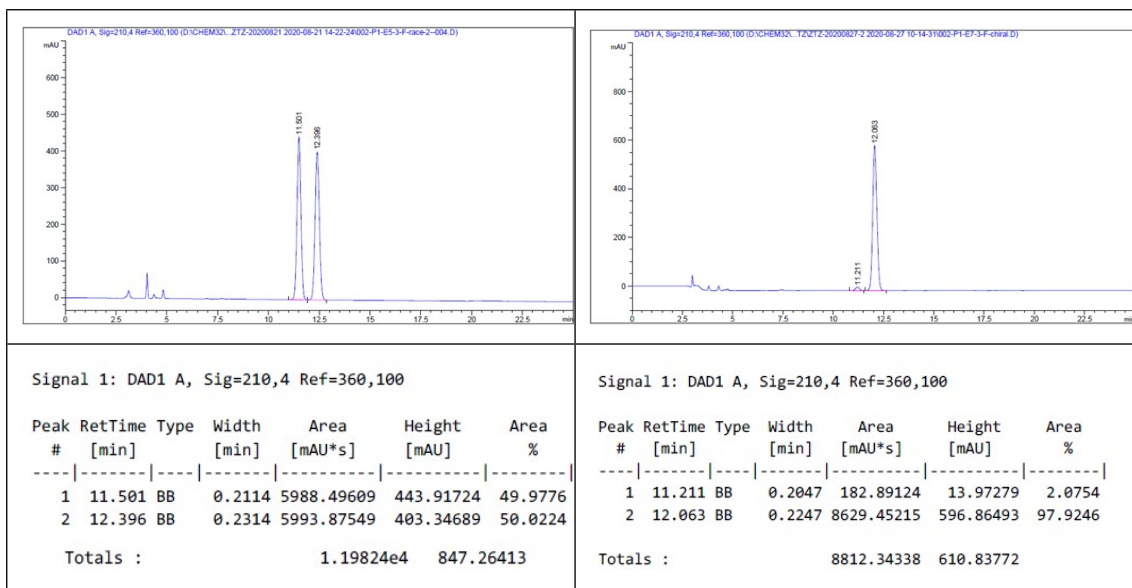

**(S)-1-(3-chlorophenyl)-2,2,2-trifluoroethan-1-ol (2k)**

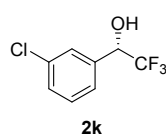

Colourless oil, >99% yield. <sup>1</sup>H NMR (400 MHz, CDCl<sub>3</sub>) δ 7.49 (s, 1H), 7.42 – 7.31 (m, 3H), 5.00 (q, *J* = 6.6 Hz, 1H), 2.75 (s, 1H). <sup>13</sup>C NMR (101 MHz, CDCl<sub>3</sub>) δ 135.7, 134.6, 129.9, 129.7, 127.6, 125.6, 123.9 (q, *J* = 282.4 Hz), 72.2 (q, *J* = 32.1 Hz). <sup>19</sup>F NMR (376 MHz, CDCl<sub>3</sub>) δ -78.35. HRMS (ESI) calcd. for C<sub>8</sub>H<sub>6</sub>ClF<sub>3</sub>O [M-H]<sup>-</sup>: 208.9987, Found: 208.9979.

**Optical Rotation:** [ $\alpha$ ]<sub>D</sub><sup>20</sup> = +17.3 (c = 1.0, CHCl<sub>3</sub>) (Lit:<sup>[7]</sup> [ $\alpha$ ]<sub>D</sub><sup>20</sup> = +23.1 (c = 1.0, CHCl<sub>3</sub>, *S*, 99.6% ee). The absolute configuration was determined to be (*S*). 98% ee. (HPLC condition: Daicel Chiralcel OJ-H Column, *n*<sub>hexane</sub>/*i*PrOH = 95/5, flow rate = 1.0 mL/min, T = 25 °C, wavelength = 210 nm, t<sub>R1</sub> = 10.8 min for minor isomer, t<sub>R2</sub> = 12.9 min for major isomer).

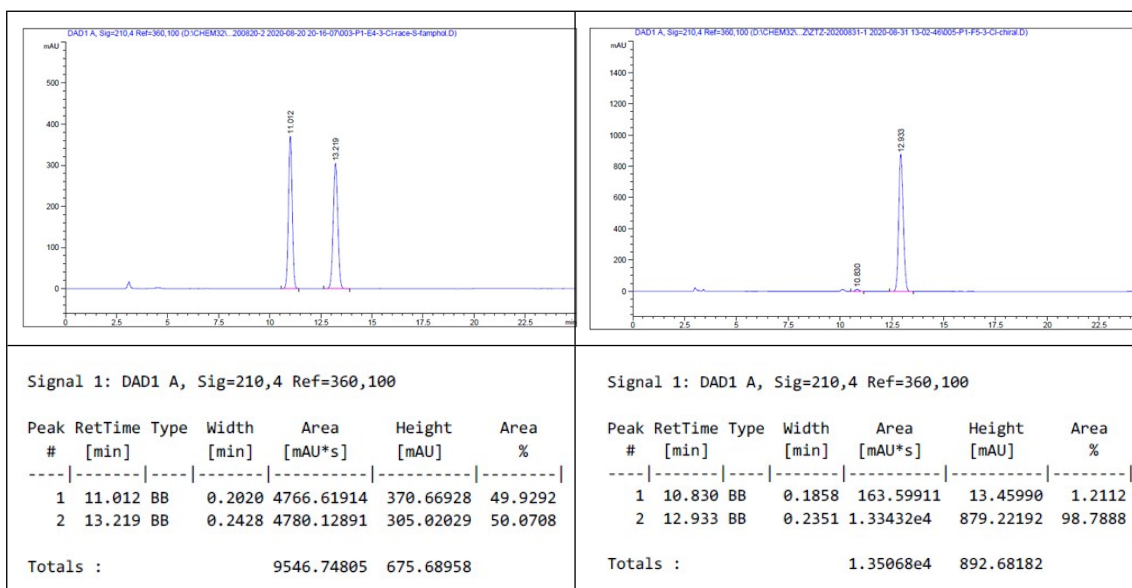

**(S)-1-(3-bromophenyl)-2,2,2-trifluoroethan-1-ol (2l)**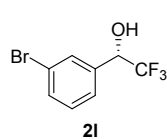

Colourless oil, >99% yield. <sup>1</sup>H NMR (400 MHz, CDCl<sub>3</sub>) δ 7.64 (s, 1H), 7.54 (ddd, *J* = 8.0, 2.0, 1.1 Hz, 1H), 7.40 (d, *J* = 7.8 Hz, 1H), 7.32 – 7.23 (m, 1H), 4.99 (qd, *J* = 6.5, 4.3 Hz, 1H), 2.73 (d, *J* = 4.4 Hz, 1H). <sup>13</sup>C NMR (101 MHz, CDCl<sub>3</sub>) δ 136.0, 132.7, 130.5, 130.1, 126.1, 124.0 (q, *J* = 282.4 Hz), 122.7, 72.1 (q, *J* = 32.5 Hz). <sup>19</sup>F NMR (565 MHz, CDCl<sub>3</sub>) δ -78.33. HRMS (ESI) calcd. for C<sub>8</sub>H<sub>6</sub>BrF<sub>3</sub>O [M-H]<sup>-</sup>: 252.9481, Found: 252.9477.

**Optical Rotation:** [α]<sub>D</sub><sup>20</sup> = +15.9 (c = 1.0, CHCl<sub>3</sub>). The absolute configuration was assigned to be (**S**) by analogy to **2a**. 97% ee. (HPLC condition: Daicel Chiralcel OJ-H Column, <sup>n</sup>hexane/<sup>i</sup>PrOH = 95/5, flow rate = 1.0 mL/min, T = 25 °C, wavelength = 230 nm, t<sub>R1</sub> = 11.2 min for minor isomer, t<sub>R2</sub> = 14.6 min for major isomer).

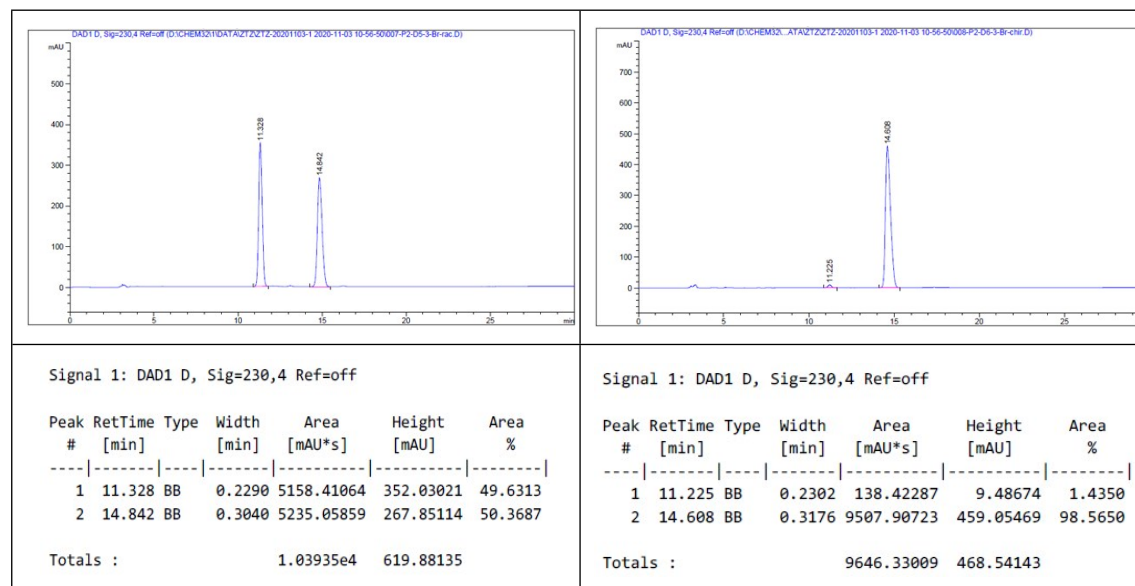**(S)-2,2,2-trifluoro-1-(naphthalen-2-yl)ethan-1-ol (2m)**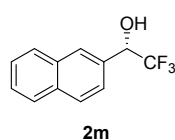

Colourless oil, 40.7 mg, 90% yield. <sup>1</sup>H NMR (400 MHz, CDCl<sub>3</sub>) δ 7.98 (s, 1H), 7.97 – 7.84 (m, 3H), 7.68 – 7.50 (m, 3H), 5.21 (qd, *J* = 6.7, 4.3 Hz, 1H), 2.78 (d, *J* = 4.5 Hz, 1H). <sup>13</sup>C NMR (151 MHz, CDCl<sub>3</sub>) δ 133.7, 132.9, 131.2, 128.5, 128.2, 127.7, 127.3, 126.9, 126.6, 124.3 (q, *J* = 282.3 Hz), 124.3, 73.0 (q, *J* = 32.5 Hz). <sup>19</sup>F NMR (376 MHz, CDCl<sub>3</sub>) δ -78.00. HRMS (ESI) calcd. for C<sub>12</sub>H<sub>9</sub>F<sub>3</sub>O [M-H]<sup>-</sup>: 225.0533, Found: 225.0526.

**Optical Rotation:** [α]<sub>D</sub><sup>20</sup> = +17.7 (c = 0.5, CHCl<sub>3</sub>). The absolute configuration was assigned to be (**S**) by analogy to **2a**. 99% ee. (HPLC condition: Daicel Chiralcel OJ-H Column, <sup>n</sup>hexane/<sup>i</sup>PrOH = 92/8, flow rate = 1.0 mL/min, T = 25 °C, wavelength = 210 nm, t<sub>R1</sub> = 21.8 min for minor isomer, t<sub>R2</sub> = 35.7 min for major isomer).



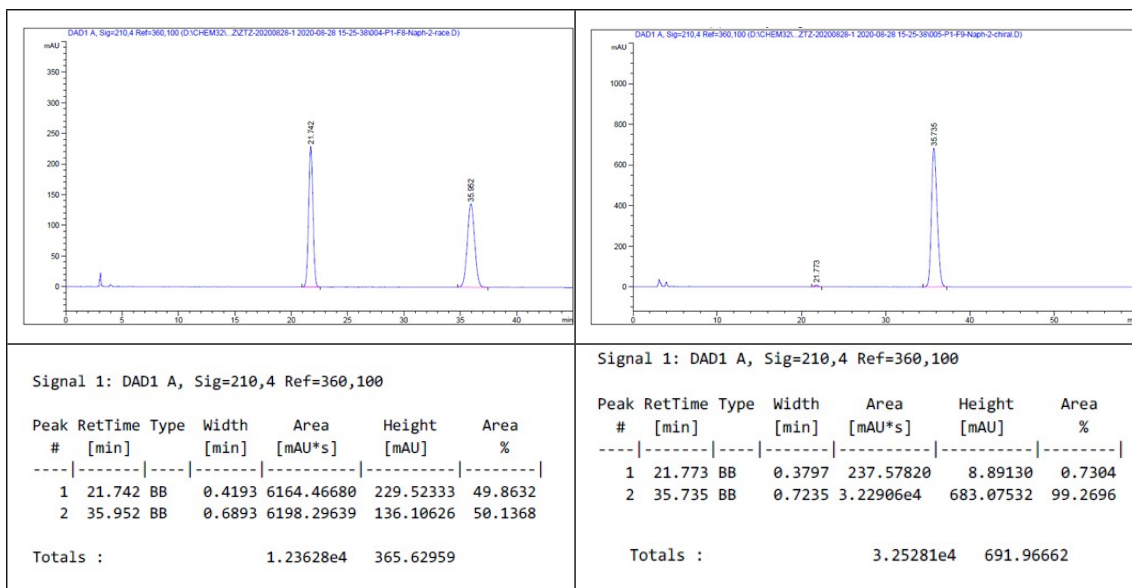

**(S)-2,2,2-trifluoro-1-(naphthalen-1-yl)ethan-1-ol (2n)**

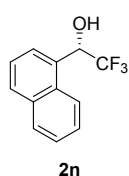

Colourless oil, 98% yield. <sup>1</sup>H NMR (600 MHz, CDCl<sub>3</sub>) δ 8.06 (d, *J* = 8.5 Hz, 1H),

7.91 (t, *J* = 7.9 Hz, 2H), 7.84 (d, *J* = 7.2 Hz, 1H), 7.61 – 7.48 (m, 3H), 5.90 (q, *J* = 6.7

Hz, 1H), 2.64 (s, 1H). <sup>13</sup>C NMR (151 MHz, CDCl<sub>3</sub>) δ 133.7, 131.1, 130.2, 129.9,

129.0, 126.8, 125.9, 125.8, 125.2, 124.7 (q, *J* = 282.3 Hz), 122.8, 69.0 (q, *J* = 31.9

Hz). <sup>19</sup>F NMR (376 MHz, CDCl<sub>3</sub>) δ -76.87. HRMS (ESI) calcd. for C<sub>12</sub>H<sub>9</sub>F<sub>3</sub>O [M-H]<sup>-</sup>: 225.0533,

Found: 225.0527.

**Optical Rotation:** [ $\alpha$ ]<sub>D</sub><sup>20</sup> = +18.2 (c = 1.0, CHCl<sub>3</sub>). The absolute configuration was assigned to be (*S*) by analogy to **2a**. 98% ee. (HPLC condition: Daicel Chiralcel OJ-H Column, <sup>n</sup>hexane/*i*PrOH = 92/8, flow rate = 1.0 mL/min, T = 25 °C, wavelength = 230 nm, t<sub>R1</sub> = 17.5 min for minor isomer, t<sub>R2</sub> = 24.7 min for major isomer).

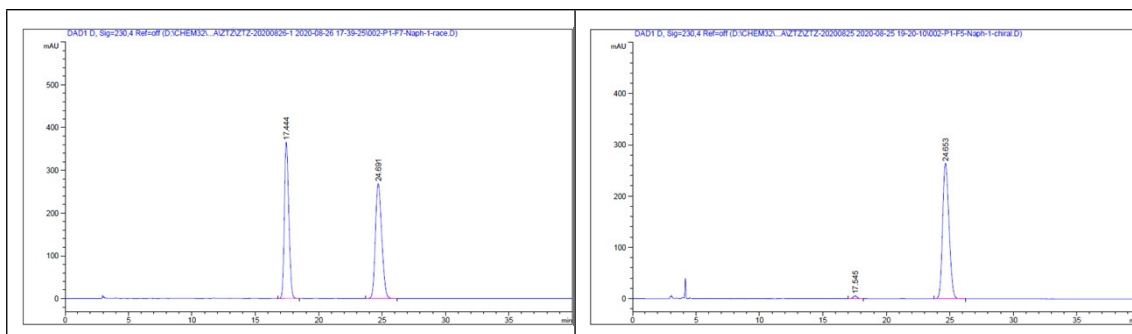

| Signal 1: DAD1 D, Sig=230,4 Ref=off |               |      |             |              |              |         | Signal 1: DAD1 D, Sig=230,4 Ref=off |               |      |             |              |              |         |
|-------------------------------------|---------------|------|-------------|--------------|--------------|---------|-------------------------------------|---------------|------|-------------|--------------|--------------|---------|
| Peak #                              | RetTime [min] | Type | Width [min] | Area [mAU*s] | Height [mAU] | Area %  | Peak #                              | RetTime [min] | Type | Width [min] | Area [mAU*s] | Height [mAU] | Area %  |
| 1                                   | 17.444        | BB   | 0.3790      | 8856.36426   | 365.13733    | 48.7160 | 1                                   | 17.545        | BB   | 0.3365      | 112.55531    | 5.12044      | 1.2081  |
| 2                                   | 24.691        | BB   | 0.5405      | 9323.22949   | 268.92386    | 51.2840 | 2                                   | 24.653        | BB   | 0.5420      | 9204.04297   | 264.45908    | 98.7919 |
| Totals :                            |               |      |             | 1.81796e4    | 634.06119    |         | Totals :                            |               |      |             | 9316.59828   | 269.57951    |         |

### (S)-2,2,2-trifluoro-1-(2-phenyl-1H-indol-3-yl)ethan-1-ol (2o)

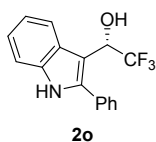

White solid, 57.7 mg, >99% yield. <sup>1</sup>H NMR (400 MHz, CDCl<sub>3</sub>) δ 8.27 (s, 1H), 7.93 (d, *J* = 7.9 Hz, 1H), 7.55 – 7.44 (m, 5H), 7.42 (d, *J* = 8.0 Hz, 1H), 7.28 (dd, *J* = 7.0, 1.2 Hz, 1H), 7.21 (ddd, *J* = 8.2, 7.1, 1.2 Hz, 1H), 5.32 (qd, *J* = 7.5, 2.6 Hz, 1H), 2.44 (s, 1H). <sup>13</sup>C NMR (101 MHz, CDCl<sub>3</sub>) δ 138.9, 135.9, 131.4, 129.1, 128.9, 126.0, 125.4 (q, *J* = 282.7 Hz), 123.1, 121.2 (q, *J* = 2.9 Hz), 120.9, 111.1, 106.1, 68.0 (q, *J* = 33.7 Hz). <sup>19</sup>F NMR (376 MHz, CDCl<sub>3</sub>) δ -75.73. HRMS (ESI) calcd. for C<sub>16</sub>H<sub>12</sub>F<sub>3</sub>NO [M-H]<sup>-</sup>: 290.0798, Found: 290.0797.

**Optical Rotation:** [ $\alpha$ ]<sub>D</sub><sup>20</sup> = +60.8 (c = 1.0, CHCl<sub>3</sub>). The absolute configuration was assigned to be (**S**) by analogy to **2a**. 98% ee. (HPLC condition: Daicel Chiralcel OD-H Column, <sup>n</sup>hexane/<sup>i</sup>PrOH = 90/10, flow rate = 1.0 mL/min, T = 25 °C, wavelength = 220 nm, t<sub>R1</sub> = 36.4 min for major isomer, t<sub>R2</sub> = 46.2 min for minor isomer).

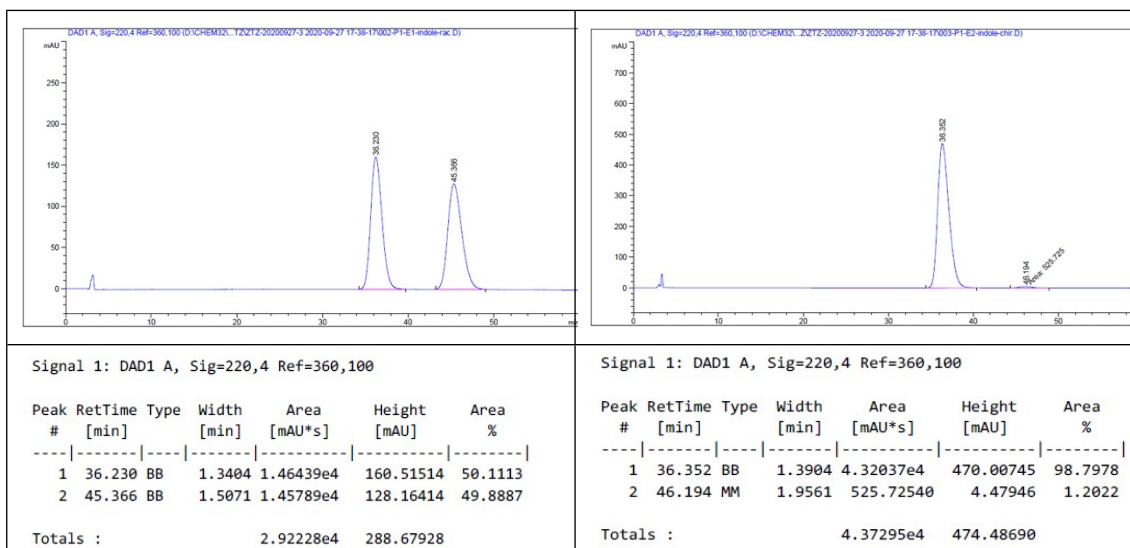

### (S)-2,2,2-trifluoro-1-(thiophen-2-yl)ethan-1-ol (2p)

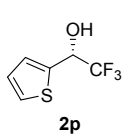

Colourless oil, >99% yield. <sup>1</sup>H NMR (400 MHz, CDCl<sub>3</sub>) δ 7.40 (dd, *J* = 5.0, 1.2 Hz, 1H), 7.20 (d, *J* = 3.5 Hz, 1H), 7.05 (dd, *J* = 5.1, 3.6 Hz, 1H), 5.28 (dt, *J* = 7.9, 5.1 Hz, 1H), 2.80 (s, 1H). <sup>13</sup>C NMR (101 MHz, CDCl<sub>3</sub>) δ 136.1, 127.5, 127.1, 127.0, 123.7 (q, *J* = 281.9 Hz), 69.3 (q, *J* = 34.0 Hz). <sup>19</sup>F NMR (376 MHz, CDCl<sub>3</sub>) δ -78.71. HRMS (ESI) calcd.

for C<sub>6</sub>H<sub>5</sub>F<sub>3</sub>OS [M+HCOO]<sup>-</sup>: 226.9995, Found: 226.9990.

**Optical Rotation:**  $[\alpha]_D^{20} = +15.9$  (c = 1.0, CHCl<sub>3</sub>) (Lit:<sup>[8]</sup>  $[\alpha]_D^{25} = +24.2$  (c = 1.0, CHCl<sub>3</sub>, S, >98% ee). The absolute configuration was determined to be (**S**). 97% ee. (HPLC condition: Daicel Chiralcel OJ-H Column, <sup>n</sup>hexane/<sup>i</sup>PrOH = 95/5, flow rate = 1.0 mL/min, T = 25 °C, wavelength = 230 nm, t<sub>R1</sub> = 16.5 min for minor isomer, t<sub>R2</sub> = 25.0 min for major isomer).

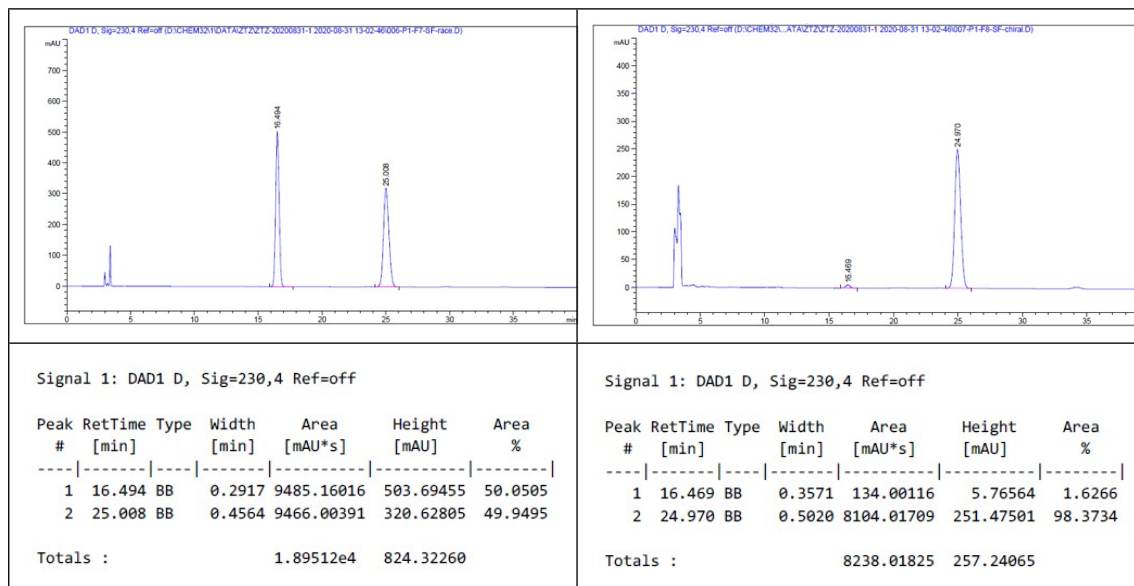

### (**S**)-2-fluoro-1-phenylethan-1-ol (**2q**)

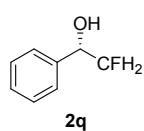

Colourless oil, 92% yield. <sup>1</sup>H NMR (400 MHz, CDCl<sub>3</sub>) δ 7.44 – 7.27 (m, 5H), 5.01 (ddd, J = 14.2, 7.7, 3.7 Hz, 1H), 4.68 – 4.20 (m, 2H), 2.64 (s, 1H). <sup>13</sup>C NMR (101 MHz, CDCl<sub>3</sub>) δ 138.1 (d, J = 8.4 Hz), 128.6, 128.4, 126.3, 87.1 (d, J = 174.4 Hz), 72.9 (d, J = 19.8 Hz). <sup>19</sup>F NMR (376 MHz, CDCl<sub>3</sub>) δ -220.56.

**Optical Rotation:**  $[\alpha]_D^{20} = +69.5$  (c = 1.0, CHCl<sub>3</sub>) (Lit:<sup>[9]</sup>  $[\alpha]_D^{20} = -56.8$  (c = 1.2, CHCl<sub>3</sub>, R, 98% ee). The absolute configuration was determined to be (**S**). 99% ee. (HPLC condition: Daicel Chiralcel OJ-H Column, <sup>n</sup>hexane/<sup>i</sup>PrOH = 95/5, flow rate = 1.0 mL/min, T = 25 °C, wavelength = 210 nm, t<sub>R1</sub> = 21.6 min for minor isomer, t<sub>R2</sub> = 24.7 min for major isomer).

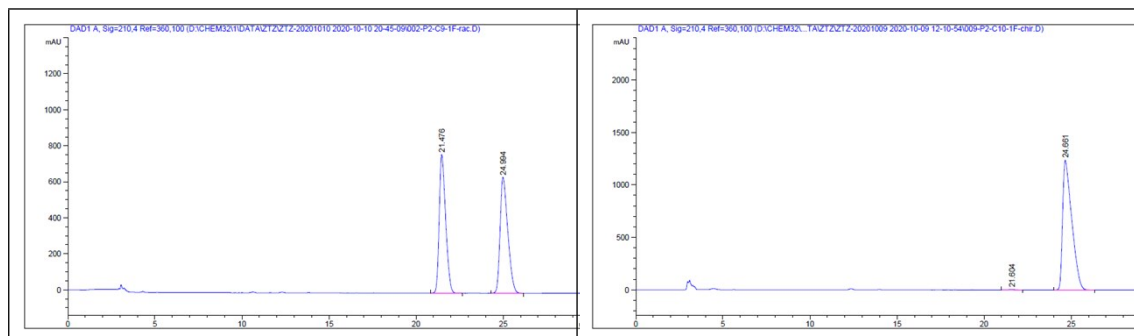

| Signal 1: DAD1 A, Sig=210,4 Ref=360,100 |               |      |             |              |              |         | Signal 1: DAD1 A, Sig=210,4 Ref=360,100 |               |      |             |              |              |         |
|-----------------------------------------|---------------|------|-------------|--------------|--------------|---------|-----------------------------------------|---------------|------|-------------|--------------|--------------|---------|
| Peak #                                  | RetTime [min] | Type | Width [min] | Area [mAU*s] | Height [mAU] | Area %  | Peak #                                  | RetTime [min] | Type | Width [min] | Area [mAU*s] | Height [mAU] | Area %  |
| 1                                       | 21.476        | BB   | 0.3902      | 1.97004e4    | 770.72473    | 49.9198 | 1                                       | 21.604        | BB   | 0.3418      | 112.93392    | 4.06852      | 0.2502  |
| 2                                       | 24.994        | BB   | 0.4638      | 1.97637e4    | 644.35651    | 50.0802 | 2                                       | 24.661        | BB   | 0.5224      | 4.50219e4    | 1237.50769   | 99.7498 |
| Totals :                                |               |      |             | 3.94641e4    | 1415.08124   |         | Totals :                                |               |      |             | 4.51348e4    | 1241.57621   |         |

### (S)-2,2-difluoro-1-phenylethan-1-ol (2r)

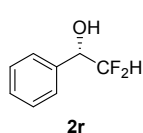

Colourless oil, >99% yield. <sup>1</sup>H NMR (400 MHz, CDCl<sub>3</sub>) δ 7.45 – 7.34 (m, 5H), 5.76 (td, *J* = 56.0, 4.7 Hz, 1H), 4.81 (td, *J* = 10.1, 4.6 Hz, 1H), 2.49 (s, 1H). <sup>13</sup>C NMR (101 MHz, CDCl<sub>3</sub>) δ 135.8 (t, *J* = 3.2 Hz), 129.0, 128.7, 127.1, 115.8 (t, *J* = 245.6 Hz), 73.7 (t, *J* = 24.4 Hz). <sup>19</sup>F NMR (376 MHz, CDCl<sub>3</sub>) δ -127.57 (q, *J* = 24.8 Hz).

**Optical Rotation:**  $[\alpha]_D^{20} = +14.4$  (*c* = 1.0, CHCl<sub>3</sub>). The absolute configuration was assigned to be (**S**) by analogy to **2a**. 99% ee. (HPLC condition: Daicel Chiralcel OJ-H Column, *n*<sup>hexane</sup>/*i*PrOH = 95/5, flow rate = 1.0 mL/min, T = 25 °C, wavelength = 210 nm, *t*<sub>R1</sub> = 29.8 min for minor isomer, *t*<sub>R2</sub> = 31.1 min for major isomer).

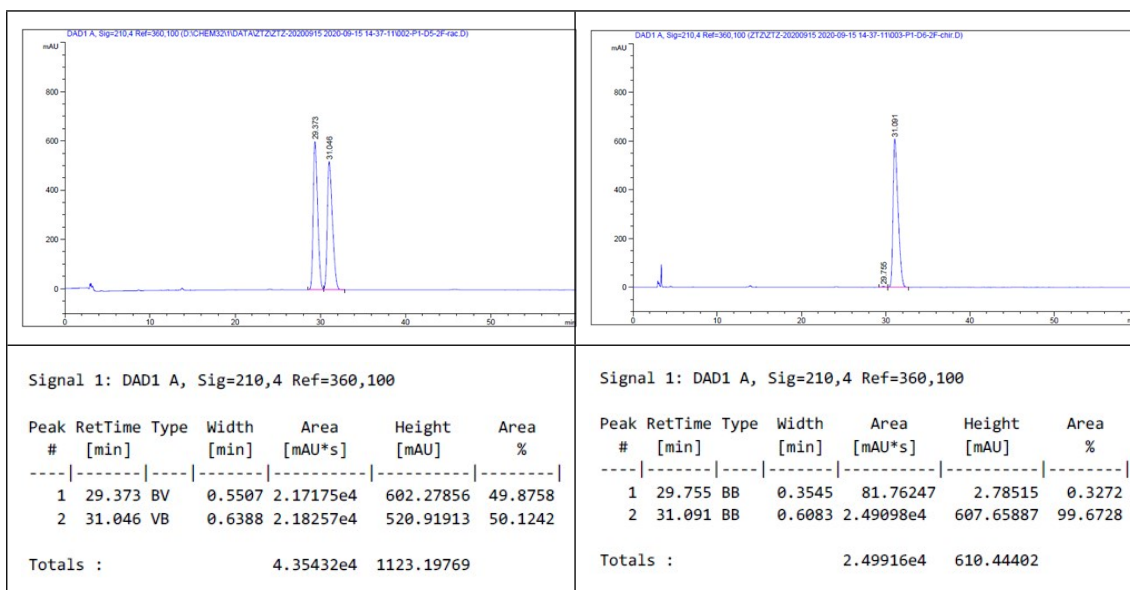

### (S)-2,2,3,3,4,4,4-heptafluoro-1-phenylbutan-1-ol (2s)

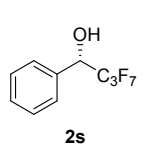

Colourless oil, 97% yield. <sup>1</sup>H NMR (400 MHz, CDCl<sub>3</sub>) δ 7.53 – 7.34 (m, 5H), 5.18 (dt, *J* = 17.7, 5.7 Hz, 1H), 2.58 (d, *J* = 5.2 Hz, 1H). <sup>13</sup>C NMR (151 MHz, CDCl<sub>3</sub>) δ 133.9, 129.7, 128.6, 128.0, 72.1 (dd, *J* = 28.5, 22.0 Hz). <sup>19</sup>F NMR (376 MHz, CDCl<sub>3</sub>) δ -80.83 (d, *J* = 8.4 Hz), -114.59 – -121.33 (m), -122.47 – -129.21 (m). Note: Two of the carbon atoms from the CF<sub>2</sub>-CF<sub>2</sub>-CF<sub>3</sub> group are not reported in the data above, due to their low signal

intensity and partial overlap with other signals.

**Optical Rotation:**  $[\alpha]_{\text{D}}^{25} = +17.3$  ( $c = 0.5$ ,  $\text{CHCl}_3$ ). The absolute configuration was assigned to be (**S**) by analogy to **2a**. 87% ee. (HPLC condition: Daicel Chiralcel OD-H Column,  $n\text{-hexane}/i\text{PrOH} = 85/15$ , flow rate = 1.0 mL/min,  $T = 25$  °C, wavelength = 208 nm,  $t_{\text{R}1} = 4.4$  min for minor isomer,  $t_{\text{R}2} = 7.6$  min for major isomer).

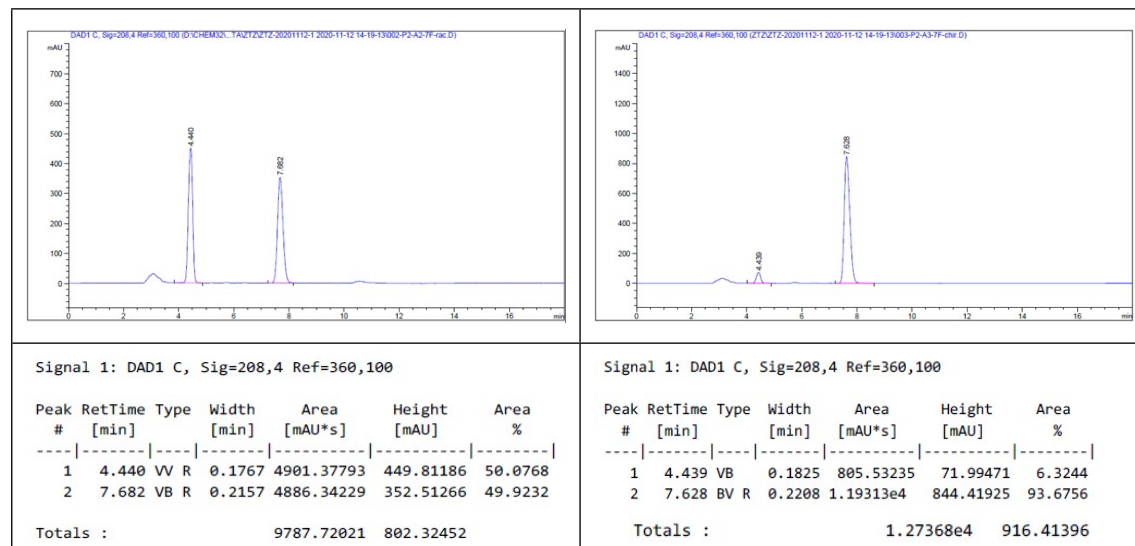

**(S,E)-1,1,1-trifluoro-4-phenylbut-3-en-2-ol (2t)**

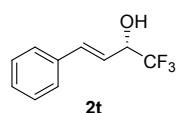

White solid, 93% yield.  $^1\text{H NMR}$  (400 MHz,  $\text{CDCl}_3$ )  $\delta$  7.45 – 7.24 (m, 5H), 6.82 (d,  $J = 15.9$  Hz, 1H), 6.18 (dd,  $J = 16.0, 6.6$  Hz, 1H), 4.60 (q,  $J = 6.3$  Hz, 1H), 2.70 (d,  $J = 5.6$  Hz, 1H).  $^{13}\text{C NMR}$  (101 MHz,  $\text{CDCl}_3$ )  $\delta$  136.4, 135.3, 128.7 (d,  $J = 3.0$  Hz), 126.9, 124.2 (q,  $J = 281.8$  Hz), 120.5 (d,  $J = 2.2$  Hz), 71.6 (q,  $J = 32.3$  Hz).  $^{19}\text{F NMR}$  (376 MHz,  $\text{CDCl}_3$ )  $\delta$  -78.97. **HRMS (ESI)** calcd. for  $\text{C}_{10}\text{H}_9\text{F}_3\text{O}$   $[\text{M}-\text{H}]^-$ : 201.0533, Found: 201.0525.

**Optical Rotation:**  $[\alpha]_{\text{D}}^{20} = +14.3$  ( $c = 1.0$ , MeOH). (Lit:<sup>[10]</sup>  $[\alpha]_{\text{D}}^{20} = -20.3$  ( $c = 0.17$ , MeOH, *R*, 67.6% ee). The absolute configuration was determined to be (**S**). 95% ee. (HPLC condition: Daicel Chiralcel OJ-H Column,  $n\text{-hexane}/i\text{PrOH} = 92/8$ , flow rate = 1.0 mL/min,  $T = 25$  °C, wavelength = 254 nm,  $t_{\text{R}1} = 10.4$  min for minor isomer,  $t_{\text{R}2} = 12.0$  min for major isomer).

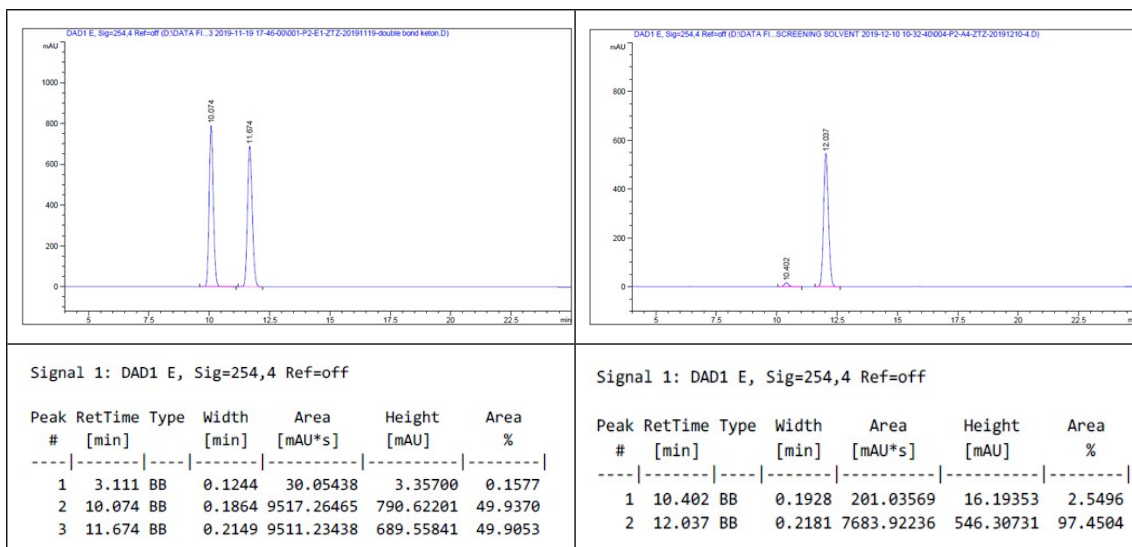

**(*S,E*)-1,1,1-trifluoro-4-(*p*-tolyl)but-3-en-2-ol (**2u**)**

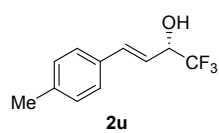

Light yellow solid, >99% yield. <sup>1</sup>H NMR (400 MHz, CDCl<sub>3</sub>) δ 7.28 (d, *J* = 8.1 Hz, 2H), 7.13 (d, *J* = 7.9 Hz, 2H), 6.77 (d, *J* = 15.9 Hz, 1H), 6.12 (dd, *J* = 15.9, 6.8 Hz, 1H), 4.57 (p, *J* = 6.7 Hz, 1H), 2.71 (s, 1H), 2.33 (s, 3H). <sup>13</sup>C

NMR (101 MHz, CDCl<sub>3</sub>) δ 138.8, 136.4, 132.5, 129.4, 126.8, 124.3 (q, *J* = 281.9 Hz), 119.4, 71.7 (q, *J* = 32.3 Hz), 21.2. <sup>19</sup>F NMR (376 MHz, CDCl<sub>3</sub>) δ -78.99. HRMS (ESI) calcd. for C<sub>11</sub>H<sub>11</sub>F<sub>3</sub>O [M-H]<sup>-</sup>: 215.0689, Found: 215.0682.

**Optical Rotation:** [α]<sub>D</sub><sup>20</sup> = +17.1 (c = 1.0, MeOH). The absolute configuration was assigned to be (*S*) by analogy to **2t**. 95% ee. (HPLC condition: Daicel Chiralcel OJ-H Column, *n*<sub>hexane</sub>/*i*PrOH = 95/5, flow rate = 1.0 mL/min, T = 25 °C, wavelength = 254 nm, t<sub>R1</sub> = 15.6 min for minor isomer, t<sub>R2</sub> = 20.0 min for major isomer).

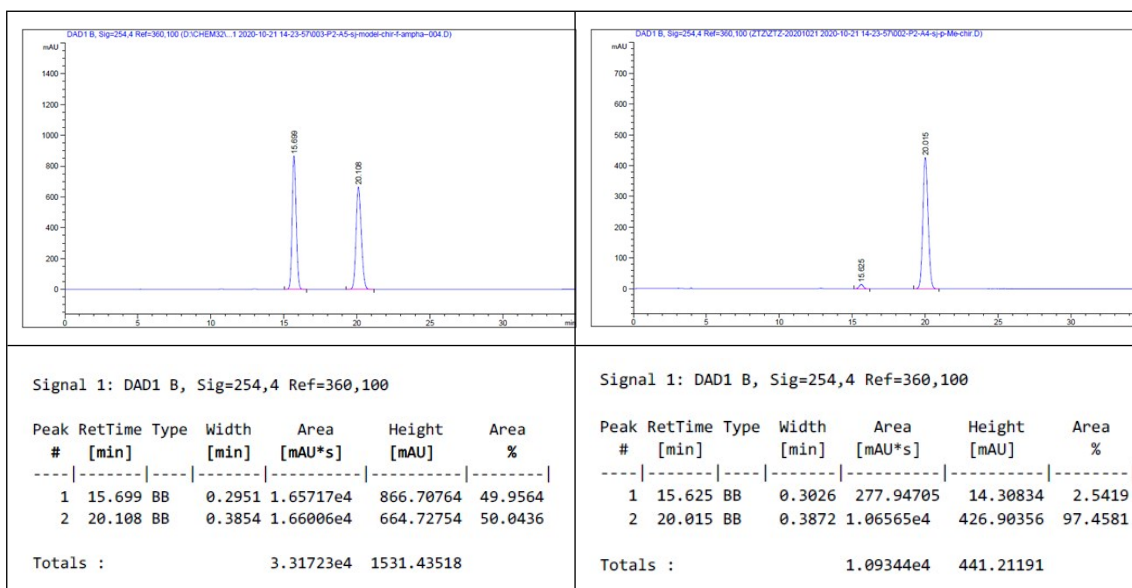

### (*S,E*)-4-(4-chlorophenyl)-1,1,1-trifluorobut-3-en-2-ol (**2v**)

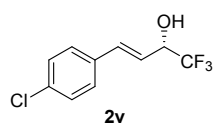

White solid, >99% yield.  $^1\text{H NMR}$  (400 MHz,  $\text{CDCl}_3$ )  $\delta$  7.39 – 7.28 (m, 4H), 6.82 (d,  $J = 15.9$  Hz, 1H), 6.18 (dd,  $J = 16.0, 6.3$  Hz, 1H), 4.64 (q,  $J = 6.1$  Hz, 1H), 2.30 (d,  $J = 5.8$  Hz, 1H).  $^{13}\text{C NMR}$  (151 MHz,  $\text{CDCl}_3$ )  $\delta$  135.0, 134.5, 133.9, 129.0, 128.1, 124.2 (q,  $J = 281.9$  Hz), 121.2, 71.5 (q,  $J = 31.8$  Hz).  $^{19}\text{F NMR}$  (376 MHz,  $\text{CDCl}_3$ )  $\delta$  -79.06.

**Optical Rotation:**  $[\alpha]_D^{20} = +12.6$  ( $c = 1.0$ , MeOH). The absolute configuration was assigned to be (**S**) by analogy to **2t**. 92% ee. (HPLC condition: Daicel Chiralcel OJ-H Column,  $n$ hexane/ $i$ PrOH = 95/5, flow rate = 1.0 mL/min,  $T = 25$  °C, wavelength = 254 nm,  $t_{R1} = 15.1$  min for minor isomer,  $t_{R2} = 16.6$  min for major isomer).

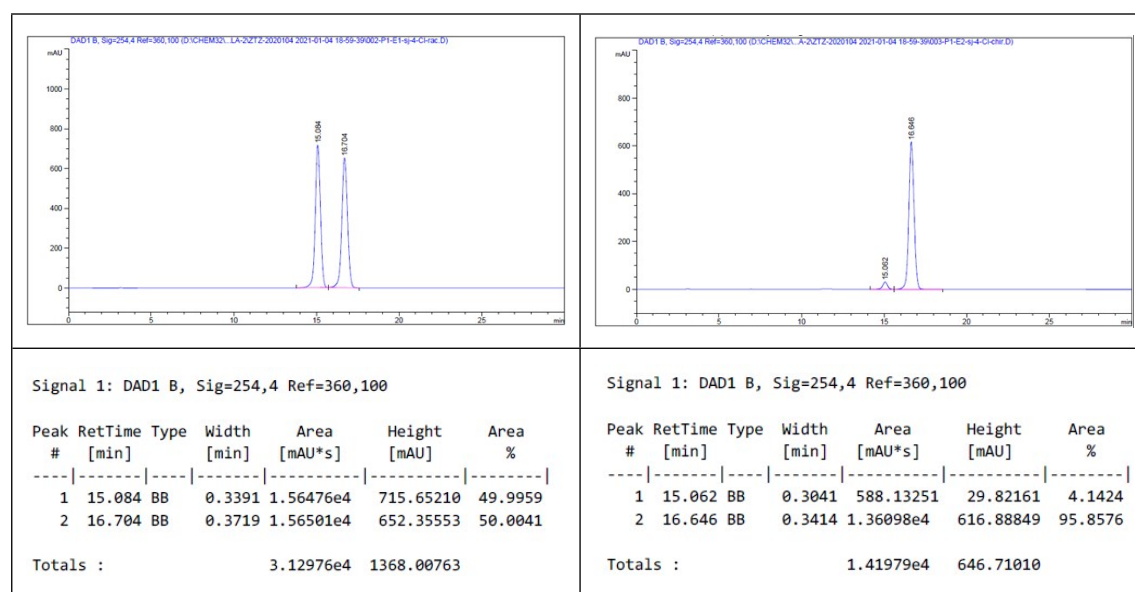

### (*S,E*)-4-(4-bromophenyl)-1,1,1-trifluorobut-3-en-2-ol (**2w**)

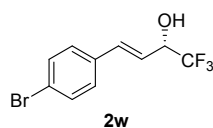

Light yellow solid, 78% yield.  $^1\text{H NMR}$  (400 MHz,  $\text{CDCl}_3$ )  $\delta$  7.64 – 7.38 (m, 2H), 7.35 – 7.15 (m, 2H), 6.79 (d,  $J = 15.9$  Hz, 1H), 6.18 (dd,  $J = 16.0, 6.3$  Hz, 1H), 4.63 (qd,  $J = 6.4, 1.4$  Hz, 1H), 2.50 (d,  $J = 5.8$  Hz, 1H).  $^{13}\text{C NMR}$  (101 MHz,  $\text{CDCl}_3$ )  $\delta$  135.0, 134.2, 131.9, 128.4, 124.1 (q,  $J = 281.9$  Hz), 122.7, 121.3 (d,  $J = 2.2$  Hz), 71.4 (q,  $J = 32.3$  Hz).  $^{19}\text{F NMR}$  (376 MHz,  $\text{CDCl}_3$ )  $\delta$  -78.99. **HRMS (ESI)** calcd. for  $\text{C}_{10}\text{H}_8\text{BrF}_3\text{O}$   $[\text{M-H}]^-$ : 278.9638, Found: 278.9636.

**Optical Rotation:**  $[\alpha]_D^{23} = -2.5$  ( $c = 1.0$ ,  $\text{CHCl}_3$ ) (Lit:<sup>[11]</sup>  $[\alpha]_D = -9.1$  ( $c = 1.6$ ,  $\text{CHCl}_3$ , *S*, >99% ee). The absolute configuration was determined to be (**S**). 93% ee. (HPLC condition: Daicel Chiralcel OJ-H Column,  $n$ hexane/ $i$ PrOH = 95/5, flow rate = 1.0 mL/min,  $T = 25$  °C, wavelength =

254 nm,  $t_{R1}$  = 17.5 min for minor isomer,  $t_{R2}$  = 19.0 min for major isomer).

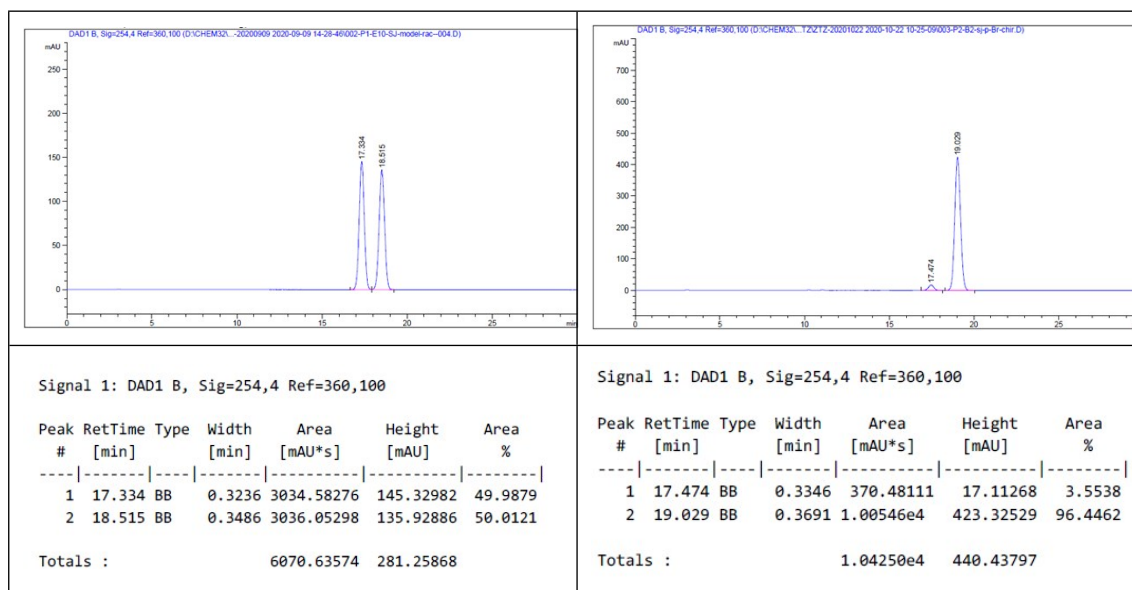

**(*S,E*)-1,1,1-trifluoro-4-(3-methoxyphenyl)but-3-en-2-ol (2x)**

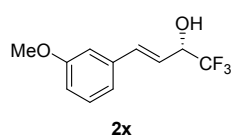

Light yellow oil, 87% yield.  $^1\text{H NMR}$  (400 MHz,  $\text{CDCl}_3$ )  $\delta$  7.32 – 7.22 (m, 1H), 7.01 (d,  $J$  = 7.7 Hz, 1H), 6.94 (t,  $J$  = 2.1 Hz, 1H), 6.88 – 6.85 (m, 1H), 6.82 (d,  $J$  = 16.9 Hz, 1H), 6.19 (dd,  $J$  = 15.9, 6.5 Hz, 1H), 4.63 (pd,  $J$  = 6.5, 1.3 Hz, 1H), 3.82 (s, 3H), 2.53 (s, 1H).  $^{13}\text{C NMR}$  (101 MHz,  $\text{CDCl}_3$ )  $\delta$  159.8, 136.7, 136.1, 129.7, 124.2 (q,  $J$  = 281.9 Hz), 121.0 (d,  $J$  = 2.1 Hz), 119.5, 114.4, 112.1, 71.5 (q,  $J$  = 32.5 Hz), 55.3.  $^{19}\text{F NMR}$  (376 MHz,  $\text{CDCl}_3$ )  $\delta$  -79.01. **HRMS (ESI)** calcd. for  $\text{C}_{11}\text{H}_{11}\text{F}_3\text{O}_2$  [M-H] $^-$ : 231.0638, Found: 231.0632.

**Optical Rotation:**  $[\alpha]_D^{20}$  = +9.7 (c = 1.0, MeOH). The absolute configuration was assigned to be (*S*) by analogy to 2t. 94% ee. (HPLC condition: Daicel Chiralcel OJ-H Column, *n*hexane/*i*PrOH = 95/5, flow rate = 1.0 mL/min, T = 25 °C, wavelength = 210 nm,  $t_{R1}$  = 24.7 min for minor isomer,  $t_{R2}$  = 31.6 min for major isomer).

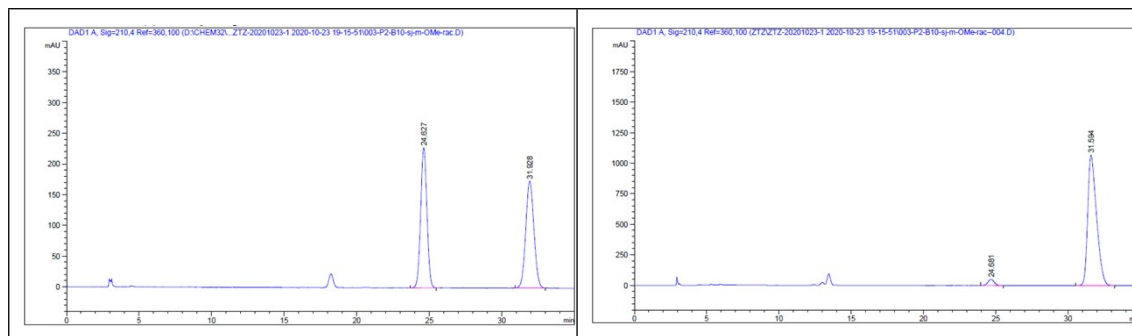



| Signal 1: DAD1 A, Sig=210,4 Ref=360,100 |               |      |             |              |              |         | Signal 1: DAD1 A, Sig=210,4 Ref=360,100 |               |      |             |              |              |         |
|-----------------------------------------|---------------|------|-------------|--------------|--------------|---------|-----------------------------------------|---------------|------|-------------|--------------|--------------|---------|
| Peak #                                  | RetTime [min] | Type | Width [min] | Area [mAU*s] | Height [mAU] | Area %  | Peak #                                  | RetTime [min] | Type | Width [min] | Area [mAU*s] | Height [mAU] | Area %  |
| 1                                       | 24.627        | BB   | 0.4602      | 6847.46826   | 228.10707    | 50.0786 | 1                                       | 24.681        | BB   | 0.4697      | 1505.14978   | 49.92312     | 3.2262  |
| 2                                       | 31.928        | BB   | 0.5939      | 6825.97070   | 173.91228    | 49.9214 | 2                                       | 31.594        | BB   | 0.6037      | 4.51494e4    | 1066.82153   | 96.7738 |
| Totals :                                |               |      |             | 1.36734e4    | 402.01935    |         | Totals :                                |               |      |             | 4.66545e4    | 1116.74465   |         |

**(S,E)-1,1,1-trifluoro-4-(2-methoxyphenyl)but-3-en-2-ol (2y)**

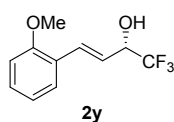

Yellow oil, >99% yield. <sup>1</sup>H NMR (400 MHz, CDCl<sub>3</sub>) δ 7.41 (dd, *J* = 7.6, 1.7 Hz, 1H), 7.30 – 7.23 (m, 1H), 7.14 (d, *J* = 16.1 Hz, 1H), 6.92 (t, *J* = 7.5 Hz, 1H), 6.87 (d, *J* = 8.3 Hz, 1H), 6.23 (dd, *J* = 16.1, 6.9 Hz, 1H), 4.59 (q, *J* = 6.7 Hz, 1H), 3.82 (s, 3H), 2.68 (d, *J* = 5.4 Hz, 1H). <sup>13</sup>C NMR (101 MHz, CDCl<sub>3</sub>) δ 157.0, 131.6, 129.8, 127.4, 124.3 (q, *J* = 281.7 Hz), 124.2, 121.2 (d, *J* = 2.2 Hz), 120.7, 111.0, 72.1 (q, *J* = 32.2 Hz), 55.4. <sup>19</sup>F NMR (376 MHz, CDCl<sub>3</sub>) δ -78.94. HRMS (ESI) calcd. for C<sub>11</sub>H<sub>11</sub>F<sub>3</sub>O<sub>2</sub> [M-H]<sup>-</sup>: 231.0638, Found: 231.0633.

**Optical Rotation:** [ $\alpha$ ]<sub>D</sub><sup>20</sup> = +7.7 (c = 1.0, MeOH). The absolute configuration was assigned to be (*S*) by analogy to **2t**. 91% ee. (HPLC condition: Daicel Chiralcel OJ-H Column, *n*hexane/*i*PrOH = 95/5, flow rate = 1.0 mL/min, T = 25 °C, wavelength = 254 nm, *t*<sub>R1</sub> = 20.5 min for minor isomer, *t*<sub>R2</sub> = 26.1 min for major isomer).

| Signal 1: DAD1 B, Sig=254,4 Ref=360,100 |               |      |             |              |              |         | Signal 1: DAD1 B, Sig=254,4 Ref=360,100 |               |      |             |              |              |         |
|-----------------------------------------|---------------|------|-------------|--------------|--------------|---------|-----------------------------------------|---------------|------|-------------|--------------|--------------|---------|
| Peak #                                  | RetTime [min] | Type | Width [min] | Area [mAU*s] | Height [mAU] | Area %  | Peak #                                  | RetTime [min] | Type | Width [min] | Area [mAU*s] | Height [mAU] | Area %  |
| 1                                       | 20.455        | BB   | 0.3989      | 6418.04199   | 250.47148    | 49.9988 | 1                                       | 20.532        | BB   | 0.3950      | 470.16525    | 18.59166     | 4.7177  |
| 2                                       | 26.183        | BB   | 0.5083      | 6418.34277   | 195.89430    | 50.0012 | 2                                       | 26.149        | BB   | 0.5028      | 9495.85254   | 289.39560    | 95.2823 |
| Totals :                                |               |      |             | 1.28364e4    | 446.36578    |         | Totals :                                |               |      |             | 9966.01779   | 307.98726    |         |

**(S,E)-1,1,1-trifluoro-3-methyl-4-phenylbut-3-en-2-ol (2z)**

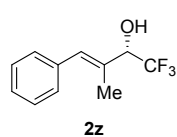

Yellow oil, 98% yield.  $^1\text{H NMR}$  (400 MHz,  $\text{CDCl}_3$ )  $\delta$  7.70 – 7.39 (m, 5H), 6.89 (s, 1H), 4.76 (p,  $J = 6.8$  Hz, 1H), 4.14 (dd,  $J = 5.0, 1.9$  Hz, 1H), 2.20 (s, 3H).  $^{13}\text{C NMR}$  (101 MHz,  $\text{CDCl}_3$ )  $\delta$  136.2, 132.0, 131.0, 129.1, 128.2, 127.3, 124.6 (q,  $J = 283.2$  Hz), 75.8 (q,  $J = 31.4$  Hz), 13.3.  $^{19}\text{F NMR}$  (376 MHz,  $\text{CDCl}_3$ )  $\delta$  -76.24. **HRMS (ESI)** calcd. for  $\text{C}_{11}\text{H}_{11}\text{F}_3\text{O}$   $[\text{M-H}]^-$ : 215.0689, Found: 215.0682.

**Optical Rotation:**  $[\alpha]_D^{20} = -27.4$  ( $c = 1.0$ ,  $\text{CHCl}_3$ ) (Lit:<sup>[11]</sup>  $[\alpha]_D = -8$  ( $c = 1.6$ ,  $\text{CHCl}_3$ ,  $S$ , 92% ee). The absolute configuration was assigned to be (**S**). 94% ee. (HPLC condition: Daicel Chiralcel OJ-H Column,  $^n$ hexane/ $^i$ PrOH = 95/5, flow rate = 1.0 mL/min,  $T = 25$  °C, wavelength = 254 nm,  $t_{R1} = 11.8$  min for minor isomer,  $t_{R2} = 14.7$  min for major isomer).

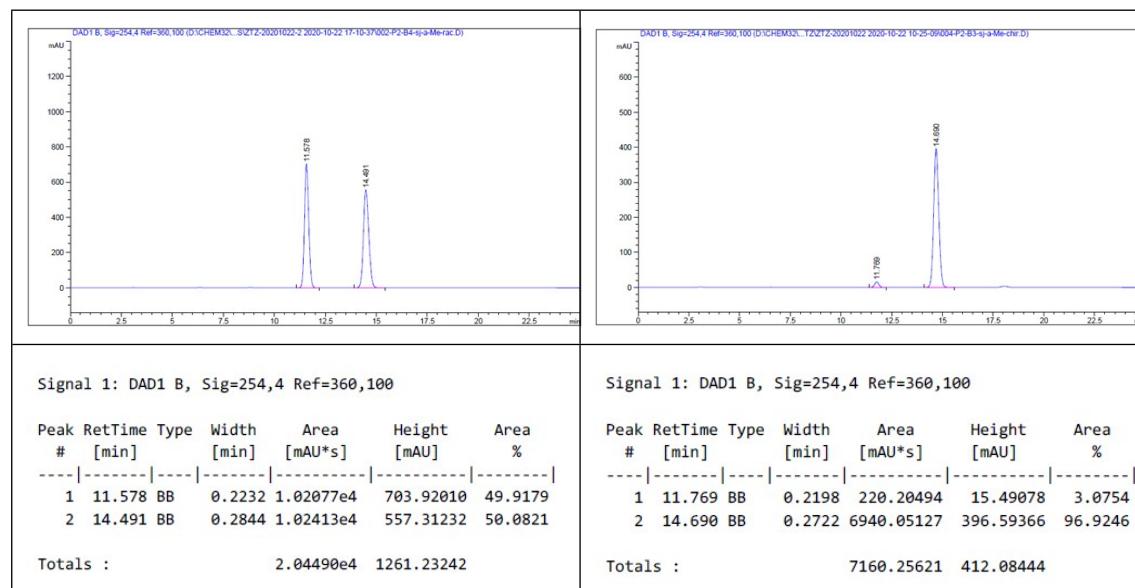

**(R)-1-phenylethan-1-ol (4)**

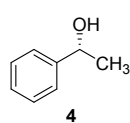

Colourless oil, 99% yield.  $^1\text{H NMR}$  (600 MHz,  $\text{CDCl}_3$ )  $\delta$  7.38 – 7.31 (m, 4H), 7.29 – 7.23 (m, 1H), 4.88 (q,  $J = 6.5$  Hz, 1H), 2.00 (s, 1H), 1.48 (d,  $J = 6.4$  Hz, 3H).  $^{13}\text{C NMR}$  (151 MHz,  $\text{CDCl}_3$ )  $\delta$  145.8, 128.5, 127.4, 125.4, 70.4, 25.1.

**Optical Rotation:**  $[\alpha]_D^{25} = +53.0$  ( $c = 1.0$ ,  $\text{CHCl}_3$ ) (Lit:<sup>[12]</sup>  $[\alpha]_D^{20} = +47.8$  ( $c = 1.0$ ,  $\text{CHCl}_3$ ,  $R$ , 99% ee). The absolute configuration was determined to be (**R**). 98% ee. (HPLC condition: Daicel Chiralcel OJ-3 Column,  $^n$ hexane/ $^i$ PrOH = 95/5, flow rate = 1.0 mL/min,  $T = 25$  °C, wavelength = 210 nm,  $t_{R1} = 11.1$  min for minor isomer,  $t_{R2} = 12.8$  min for major isomer).

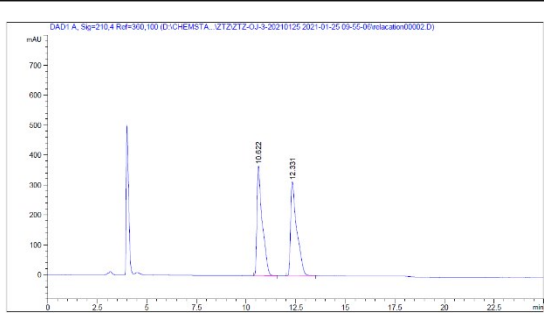

Signal 1: DAD1 A, Sig=210,4 Ref=360,100

| Peak # | RetTime [min] | Type | Width [min] | Area [mAU*s] | Height [mAU] | Area %  |
|--------|---------------|------|-------------|--------------|--------------|---------|
| 1      | 10.622        | BB   | 0.2582      | 6776.92871   | 365.67569    | 49.9780 |
| 2      | 12.331        | BB   | 0.3021      | 6782.89209   | 313.84119    | 50.0220 |

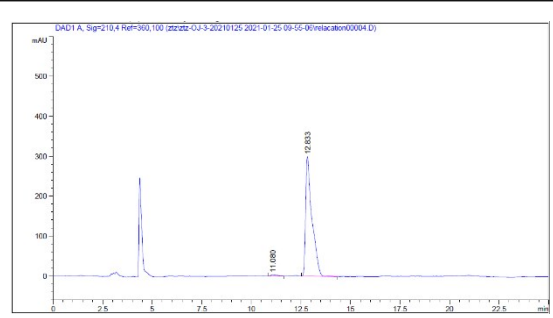

Signal 1: DAD1 A, Sig=210,4 Ref=360,100

| Peak # | RetTime [min] | Type | Width [min] | Area [mAU*s] | Height [mAU] | Area %  |
|--------|---------------|------|-------------|--------------|--------------|---------|
| 1      | 11.080        | BB   | 0.2301      | 68.23878     | 3.82601      | 1.0181  |
| 2      | 12.833        | BV R | 0.3104      | 6634.04736   | 299.55902    | 98.9819 |

#### IV. Applications of secondary trifluoromethyl alcohols

##### The late-stage modification of estrone with **2h**

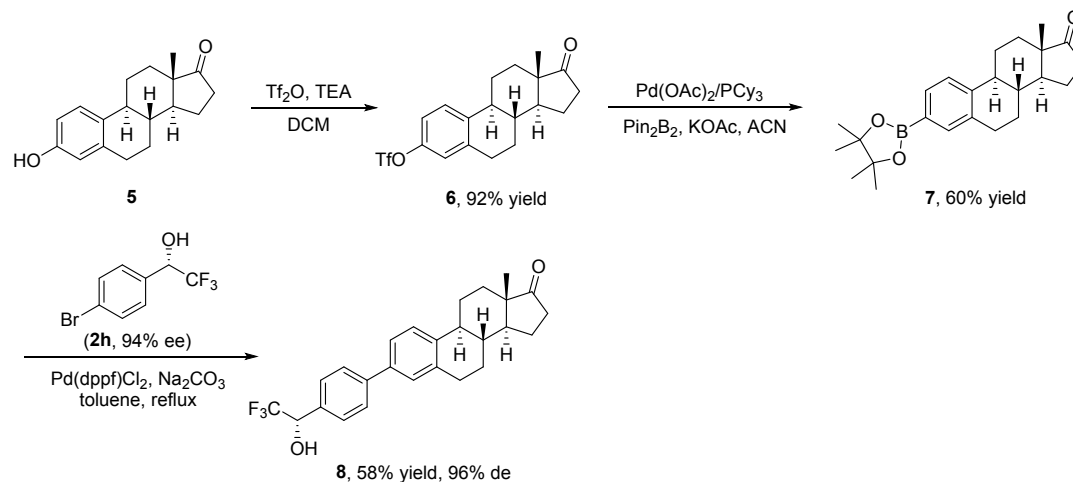

To a mixture of Estrone (8 mmol) and TEA (16 mmol) in DCM were dropwise added  $\text{Tf}_2\text{O}$  (9.6 mmol) under an argon at 0 °C, the reaction mixture was stirred at rt for 1.5 h. Then, saturated  $\text{NaHCO}_3$  solution was added to the reaction mixture. Further ethyl acetate was added, the organic phases were separated, and the aqueous layer was extracted with ethyl acetate. The combined organic phase was dried with  $\text{Na}_2\text{SO}_4$  and evaporated in vacuum. Purification of the residue by silica gel (hexanes/EtOAc 10/1) afforded the desired estrone trifluoromethanesulfonic ester **6** as a white solid.<sup>[13]</sup>

Tricyclohexylphosphine (1.9 mol%), palladium acetate (0.9 mol%), and triflate **6** (2.5 mmol) were added to a mixture of bis(pinacolato)diboron (2.75 mmol) and potassium acetate (5.0 mmol) in acetonitrile under nitrogen. The mixture was stirred at refluxing temperature until reaction completion, cooled to 30 – 40 °C, and filtered through a pad of cellulose powder. The filtercake was washed with acetonitrile. The combined filtrate was evaporated under reduced pressure and the residue was purified by column chromatography (hexanes/EtOAc 10/1~2/1) to afford pure **7** as a white solid.<sup>[14]</sup>

To a solution of **2h** (0.8 mmol) in toluene were added boronic acid **7** (0.76 mmol) and 2 M  $\text{Na}_2\text{CO}_3$  aqueous (1.8 mL, 1.52 mmol) and  $\text{Pd}(\text{dppf})\text{Cl}_2$  (0.019 mmol). The solution was degassed with  $\text{N}_2$  flowing for 30 min. Then the mixture solution was heated to reflux for 10 h. After the reaction was finished, the reaction mixture was cooled to rt and extracted with ethyl acetate (3 × 100 mL). The combined organic phase was dried with  $\text{Na}_2\text{SO}_4$  and evaporated in vacuum. Purification of the residue by silica gel (hexanes/EtOAc 20/1~2/1) afforded **8** as a white solid.

**(8R,9S,13S,14S)-13-methyl-17-oxo-7,8,9,11,12,13,14,15,16,17-decahydro-6H-cyclopenta[a]phenanthren-3-yl trifluoromethanesulfonate (6)**

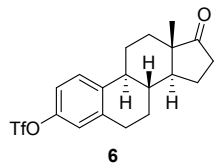

White solid, 2.96 g, 92% yield.  $^1\text{H NMR}$  (400 MHz,  $\text{CDCl}_3$ )  $\delta$  7.34 (d,  $J = 8.6$  Hz, 1H), 7.04 (dd,  $J = 8.6, 2.8$  Hz, 1H), 6.99 (d,  $J = 2.7$  Hz, 1H), 2.94 (dd,  $J = 9.0, 4.4$  Hz, 2H), 2.52 (dd,  $J = 18.8, 8.7$  Hz, 1H), 2.45 – 2.37 (m, 1H), 2.30 (td,  $J = 10.7, 4.3$  Hz, 1H), 2.22 – 1.91 (m, 4H), 1.72 – 1.59 (m, 2H), 1.59 – 1.41 (m, 4H), 0.92 (s, 3H).  $^{13}\text{C NMR}$  (101 MHz,  $\text{CDCl}_3$ )  $\delta$  220.3, 147.5, 140.2, 139.3, 127.1, 121.2, 118.7 (d,  $J = 319.8$  Hz), 118.2, 50.3, 47.8, 44.0, 37.7, 35.7, 31.4, 29.3, 26.0, 25.6, 21.5, 13.7.  $^{19}\text{F NMR}$  (376 MHz,  $\text{CDCl}_3$ )  $\delta$  -72.97.

**(8R,9S,13S,14S)-13-methyl-3-(4,4,5,5-tetramethyl-1,3,2-dioxaborolan-2-yl)-6,7,8,9,11,12,13,14,15,16-decahydro-17H-cyclopenta[a]phenanthren-17-one (7)**

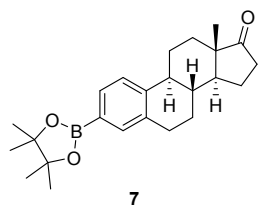

White solid, 570.5 mg, 60% yield.  $^1\text{H NMR}$  (400 MHz,  $\text{CDCl}_3$ )  $\delta$  7.74 – 7.54 (m, 2H), 7.32 (d,  $J = 8.0$  Hz, 1H), 3.11 – 2.79 (m, 2H), 2.57 – 2.41 (m, 2H), 2.33 (td,  $J = 10.8, 4.1$  Hz, 1H), 2.21 – 1.89 (m, 4H), 1.74 – 1.39 (m, 7H), 1.34 (s, 12H), 0.91 (s, 3H).  $^{13}\text{C NMR}$  (101 MHz,  $\text{CDCl}_3$ )  $\delta$  220.8, 143.1, 135.7, 135.5, 132.1, 124.7, 83.6, 50.5, 47.9, 44.6, 37.9, 35.8, 31.5, 29.1, 26.4, 25.5, 24.8, 24.7, 21.5, 13.8.

**(8R,9S,13S,14S)-13-methyl-3-(4-((S)-2,2,2-trifluoro-1-hydroxyethyl)phenyl)-6,7,8,9,11,12,13,14,15,16-decahydro-17H-cyclopenta[a]phenanthren-17-one (8)**

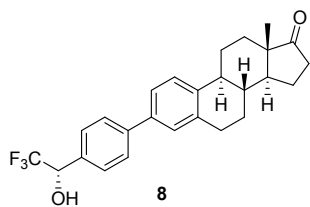

White solid, 188.9 mg, 58% yield.  $^1\text{H NMR}$  (600 MHz,  $\text{DMSO}-d_6$ )  $\delta$  7.66 (d,  $J = 7.9$  Hz, 2H), 7.55 (d,  $J = 7.9$  Hz, 2H), 7.43 (d,  $J = 8.1$  Hz, 1H), 7.40 – 7.33 (m, 2H), 6.86 (s, 1H), 5.20 (q,  $J = 7.3$  Hz, 1H), 3.04 – 2.83 (m, 2H), 2.48 – 2.37 (m, 2H), 2.28 (td,  $J = 11.0, 3.9$  Hz, 1H), 2.07 (dt,  $J = 18.3, 8.8$  Hz, 1H), 2.02 – 1.92 (m, 2H), 1.79 (d,  $J = 10.4$  Hz, 1H), 1.64 – 1.31 (m, 6H), 0.84 (s, 3H).  $^{13}\text{C NMR}$  (151 MHz,  $\text{DMSO}-d_6$ )  $\delta$  219.6, 140.7, 139.3, 137.0, 136.9, 134.7, 128.2, 127.1, 126.3, 126.0, 125.2 (q,  $J = 282.5$  Hz), 124.0, 70.3 (q,  $J = 30.4, 29.9$  Hz), 49.7, 47.4, 43.9, 37.7, 35.4, 31.4, 29.1, 26.1, 25.4, 21.2, 13.6.  $^{19}\text{F NMR}$  (565 MHz,  $\text{DMSO}-d_6$ )  $\delta$  -76.68. **HRMS (ESI)** calcd. for  $\text{C}_{26}\text{H}_{27}\text{F}_3\text{O}_2$  [ $\text{M}+\text{HCOO}$ ] $^-$ : 473.1945, Found: 473.1941.

**Optical Rotation:**  $[\alpha]_D^{23} = +43.4$  ( $c = 1.0$ , MeOH). 96% de. (HPLC condition: Daicel Chiralcel AD-H Column, <sup>n</sup>hexane/<sup>n</sup>PrOH = 90/10, flow rate = 1.0 ml/min, T = 25 °C, wavelength = 210 nm,  $t_{R1} = 15.3$  min for minor isomer,  $t_{R2} = 25.7$  min for major isomer).

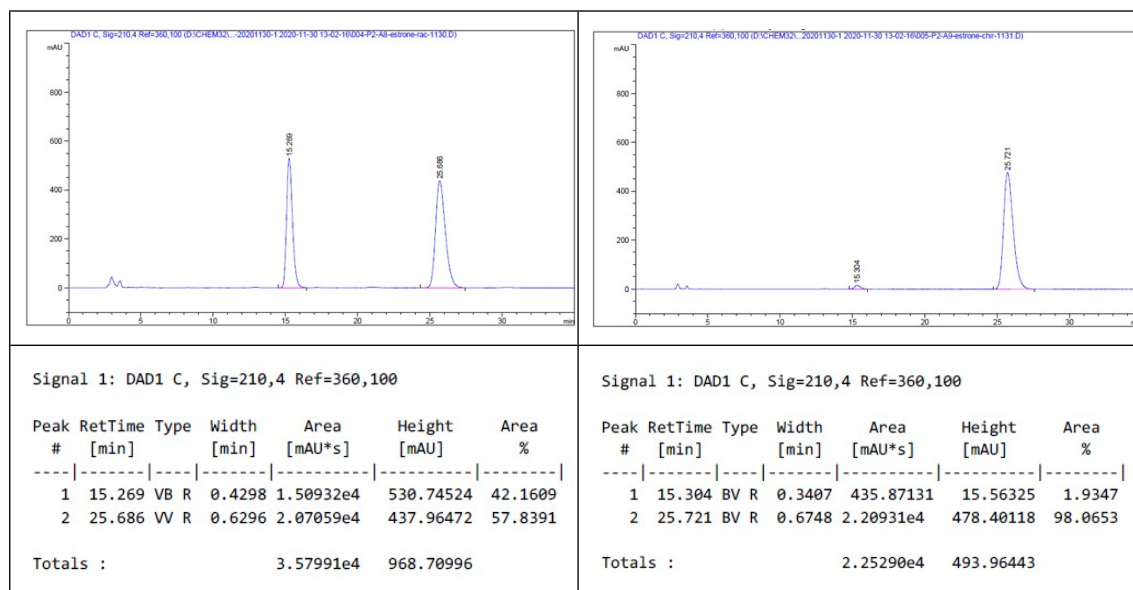

### The synthesis of Odanacatib precursor

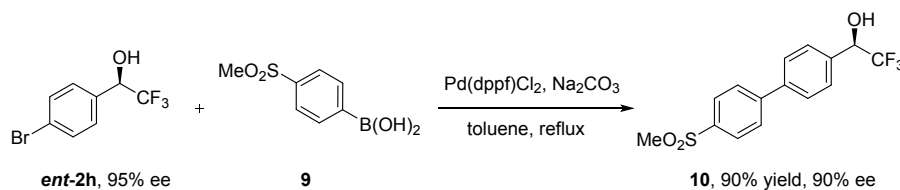

To a solution of *ent-2h* (1.8 mmol) in toluene were added (4-(methylsulfonyl)phenyl)boronic acid **9** (1.9 mmol) and 2 M Na<sub>2</sub>CO<sub>3</sub> aqueous (1.8 mL, 3.6 mmol) and Pd(dppf)Cl<sub>2</sub> (0.045 mmol). The solution was degassed with N<sub>2</sub> flowing for 30 min. Then the mixture solution was heated to reflux for 10 h. After the reaction was finished, the reaction mixture was cooled to rt and extracted with ethyl acetate (3 × 100 mL). The combined organic phase was dried with Na<sub>2</sub>SO<sub>4</sub> and evaporated in vacuum. Purification of the residue by silica gel (hexanes/EtOAc 20/1~2/1) afforded **10** as a white solid.

### (*R*)-2,2,2-trifluoro-1-(4'-(methylsulfonyl)-[1,1'-biphenyl]-4-yl)ethan-1-ol (**10**)

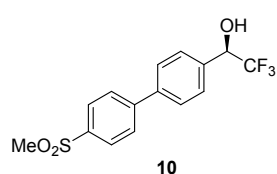

White solid, 535.1 mg, 90% yield. <sup>1</sup>H NMR (400 MHz, CDCl<sub>3</sub>) δ 8.01 (d,  $J = 8.5$  Hz, 2H), 7.76 (d,  $J = 8.5$  Hz, 2H), 7.64 (t,  $J = 7.3$  Hz, 4H), 5.12 (qd,  $J = 6.6, 4.5$  Hz, 1H), 3.10 (s, 3H), 2.84 (d,  $J = 4.6$  Hz, 1H). <sup>13</sup>C NMR (101 MHz, DMSO-*d*<sub>6</sub>) δ 144.7, 139.9, 138.9, 136.4, 128.5, 127.8

(d,  $J = 1.8$  Hz), 127.2, 125.1 (q,  $J = 282.8$  Hz), 70.2 (q,  $J = 30.5$  Hz), 43.7.  $^{19}\text{F}$  NMR (376 MHz,  $\text{CDCl}_3$ )  $\delta$  -78.27. HRMS (ESI) calcd. for  $\text{C}_{15}\text{H}_{13}\text{F}_3\text{O}_2$   $[\text{M}+\text{HCOO}]^-$ : 375.0525, Found: 375.0517.

**Optical Rotation:**  $[\alpha]_{\text{D}}^{23} = -12.1$  ( $c = 1.0$ , THF) (Lit:<sup>[15]</sup>  $[\alpha]_{\text{D}} = -27.2$  ( $c = 1.5$ , THF,  $R$ ,  $> 99\%$  ee). The absolute configuration of **10** was determined to be (**R**). 90% ee (HPLC condition: Daicel Chiralcel AD-H Column,  $^n\text{hexane}/i\text{PrOH} = 80/20$ , flow rate = 0.8 ml/min,  $T = 25$  °C, wavelength = 254 nm,  $t_{\text{R}1} = 17.9$  min for major isomer,  $t_{\text{R}2} = 20.8$  min for minor isomer).

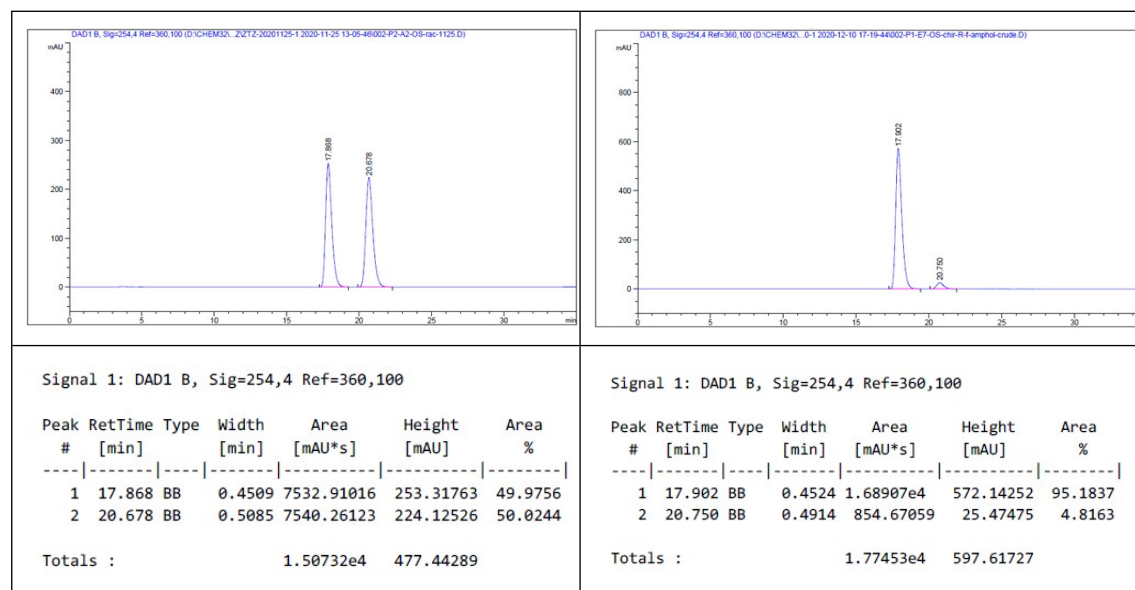

### The synthesis of biaryl chiral alcohol (**13**) to LX1031

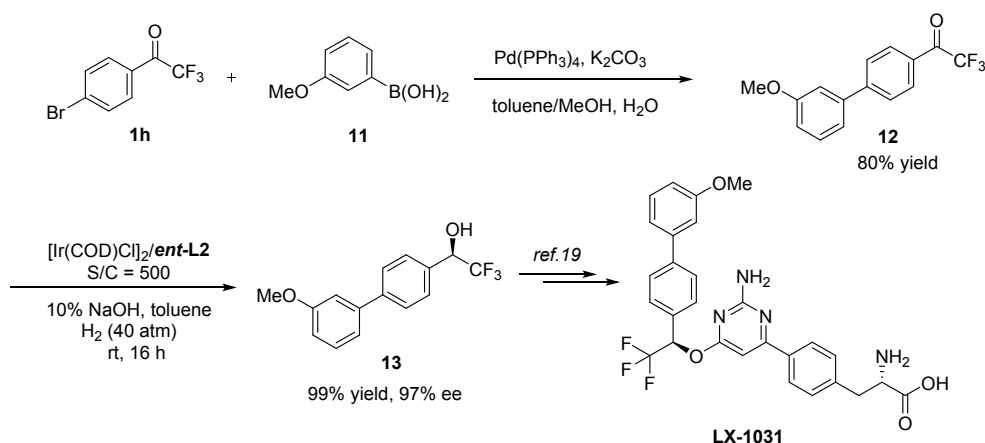

To a solution of 1-(4-bromophenyl)-2,2,2-trifluoroethan-1-one **1h** (8.0 mmol) in toluene and MeOH were added boronic (9.5 mmol), 4 M  $\text{K}_2\text{CO}_3$  aqueous (6 mL, 24 mmol), and  $\text{Pd}(\text{PPh}_3)_4$  (0.4 mmol). The solution was degassed with  $\text{N}_2$  flowing for 30 min. The solution was heated to reflux for 6 h. After the reaction was finished, the reaction mixture was cooled to rt and extracted with ethyl acetate ( $3 \times 100$  mL). The combined organic phase was dried with  $\text{Na}_2\text{SO}_4$  and evaporated in

vacuum. Purification of the residue by silica gel (hexanes/EtOAc 50/1~25/1) afforded the desired coupling product **12** as a white solid.<sup>[16]</sup>

To a 4.0 mL vial was added the catalyst precursor [Ir(COD)Cl]<sub>2</sub> (6.7 mg, 9.97 μmol, 1.0 equiv), (*R<sub>C</sub>*, *S<sub>C</sub>*, *R<sub>C</sub>*, *S<sub>FC</sub>*)-*f*-amphol **ent-L2** (16.2 mg, 21.04 μmol, 2.1 equiv) and anhydrous <sup>i</sup>PrOH (2.0 mL) in the argon-filled glovebox. The mixture was stirred for 2.0 h at 25 °C. The resulting orange solution (20 μL) was transferred by syringe into a vial (5.0 mL) charged with compound (0.2 mmol), NaOH (0.8 mg, 0.02 mmol) and anhydrous toluene (1.0 mL). The vial was transferred to an autoclave, which was then charged with of H<sub>2</sub> (40 atm) and stirred at rt for 16 h. The hydrogen gas was released slowly in a well-ventilated hood, and the solution was concentrated and purified by silica gel (hexanes/EtOAc 50/1~25/1) afforded **13** as a white solid.

#### 2,2,2-trifluoro-1-(3'-methoxy-[1,1'-biphenyl]-4-yl)ethan-1-one (**12**)

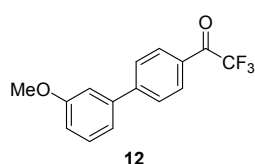

White solid, 1.79 g, 80% yield. <sup>1</sup>H NMR (400 MHz, CDCl<sub>3</sub>) δ 8.15 (d, *J* = 7.9 Hz, 2H), 7.76 (d, *J* = 8.5 Hz, 2H), 7.41 (t, *J* = 8.0 Hz, 1H), 7.23 (d, *J* = 7.8 Hz, 1H), 7.18 – 7.14 (m, 1H), 6.99 (dd, *J* = 8.0, 2.2 Hz, 1H), 3.89 (s, 3H). <sup>13</sup>C NMR (151 MHz, CDCl<sub>3</sub>) δ 180.0 (q, *J* = 34.9 Hz), 160.1, 148.1, 140.5, 130.7, 130.1, 128.6, 127.7, 119.8, 116.7 (q, *J* = 291.3 Hz), 114.1, 113.2, 55.3. <sup>19</sup>F NMR (376 MHz, CDCl<sub>3</sub>) δ -71.32.

#### (*R*)-2,2,2-trifluoro-1-(3'-methoxy-[1,1'-biphenyl]-4-yl)ethan-1-ol (**13**)

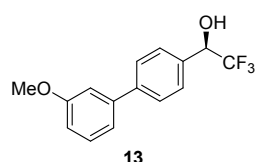

White solid, 55.9 mg, 99% yield. <sup>1</sup>H NMR (400 MHz, CDCl<sub>3</sub>) δ 7.63 (d, *J* = 8.3 Hz, 2H), 7.55 (d, *J* = 8.1 Hz, 2H), 7.37 (t, *J* = 7.9 Hz, 1H), 7.22 – 7.14 (m, 1H), 7.12 (dd, *J* = 2.6, 1.7 Hz, 1H), 6.92 (ddd, *J* = 8.3, 2.6, 1.0 Hz, 1H), 5.08 (qd, *J* = 6.7, 4.6 Hz, 1H), 3.87 (s, 3H), 2.60 (d, *J* = 4.6 Hz, 1H). <sup>13</sup>C NMR (101 MHz, CDCl<sub>3</sub>) δ 160.0, 142.4, 141.8, 133.0, 129.9, 127.8, 127.4, 124.3 (q, *J* = 282.1 Hz), 119.7, 113.0, 129.9, 72.6 (q, *J* = 31.9 Hz), 55.3. <sup>19</sup>F NMR (376 MHz, CDCl<sub>3</sub>) δ -78.27. HRMS (ESI) calcd. for C<sub>15</sub>H<sub>13</sub>F<sub>3</sub>O<sub>2</sub> [M-H]<sup>-</sup>: 281.0795, Found: 281.0791.

**Optical Rotation:** [α]<sub>D</sub><sup>22</sup> = -22.2 (c = 1.0, EtOH) (Lit:<sup>[14]</sup> [α]<sub>D</sub> = -31.85 (c = 1.067, EtOH, *R*, >99% ee). The absolute configuration was determined to be (*R*). 97% ee (HPLC condition: Daicel Chiralcel OD-H Column, <sup>n</sup>hexane/<sup>i</sup>PrOH = 95/5, flow rate = 1.0 ml/min, T = 25 °C, wavelength = 254 nm, t<sub>R1</sub> = 24.3 min for major isomer, t<sub>R2</sub> = 35.1 min for minor isomer).





## V. References

- (1) Cheng, H.; Pei, Y.; Leng, F.; Li, J.; Liang, A.; Zou, D.; Wu, Y.; Wu, Y. Highly Efficient Synthesis of Aryl and Heteroaryl Trifluoromethyl Ketones Via *o*-Iodobenzoic Acid (IBX). *Tetrahedron Lett.* **2013**, *54* (33), 4483-4486.
- (2) Xu, X.; Min, Q.-Q.; Li, N.; Liu, F. Visible Light-Promoted Umpolung Coupling of Aryl Tri-/Difluoroethanones with 2-Alkenylpyridines. *Chem. Commun.* **2018**, *54* (78), 11017-11020.
- (3) Brüning, F.; Nagae, H.; Käch, D.; Mashima, K.; Togni, A. Asymmetric Hydrogenation of Aryl Perfluoroalkyl Ketones Catalyzed by Rhodium(III) Monohydride Complexes Bearing Josiphos Ligands. *Chem. - Eur. J.* **2019**, *25* (46), 10818-10822.
- (4) (a) Gu, G.; Lu, J.; Yu, O.; Wen, J.; Yin, Q.; Zhang, X. Enantioselective and Diastereoselective Ir-Catalyzed Hydrogenation of  $\alpha$ -Substituted  $\beta$ -Ketoesters Via Dynamic Kinetic Resolution. *Org. Lett.* **2018**, *20* (7), 1888-1892; (b) Gu, G.; Yang, T.; Lu, J.; Wen, J.; Dang, L.; Zhang, X. Iridium/*f*-Ampho-Catalyzed Asymmetric Hydrogenation of Aromatic  $\alpha$ -Keto Esters. *Org. Chem. Front.* **2018**, *5* (7), 1209-1212.
- (5) Hodgkinson, R.; Jurčik, V.; Zanotti-Gerosa, A.; Nedden, H. G.; Blackaby, A.; Clarkson, G. J.; Wills, M. Synthesis and Catalytic Applications of an Extended Range of Tethered Ruthenium(II)/ $\eta^6$ -Arene/Diamine Complexes. *Organometallics* **2014**, *33* (19), 5517-5524.
- (6) Korenaga, T.; Nomura, K.; Onoue, K.; Sakai, T. Rational Electronic Tuning of CBS Catalyst for Highly Enantioselective Borane Reduction of Trifluoroacetophenone. *Chem. Commun.* **2010**, *46* (45), 8624-8626.
- (7) Rowan, A. S.; Moody, T. S.; Howard, R. M.; Underwood, T. J.; Miskelly, I. R.; He, Y.; Wang, B. Preparative Access to Medicinal Chemistry Related Chiral Alcohols Using Carbonyl Reductase Technology. *Tetrahedron: Asymmetry* **2013**, *24* (21), 1369-1381.
- (8) Contente, M. L.; Serra, I.; Molinari, F.; Gandolfi, R.; Pinto, A.; Romano, D. Preparation of Enantiomerically Enriched Aromatic  $\beta$ -Hydroxynitriles and Halohydrins by Ketone Reduction with Recombinant Ketoreductase KRED1-Pglu. *Tetrahedron* **2016**, *72* (27), 3974-3979.
- (9) Thvedt, T. H. K.; Fuglseth, E.; Sundby, E.; Hoff, B. H. Enantioenriched 1-Aryl-2-Fluoroethylamines. Efficient Lipase-Catalysed Resolution and Limitations to the Mitsunobu Inversion Protocol. *Tetrahedron* **2010**, *66* (34), 6733-6743.
- (10) Xu, Q.; Zhou, H.; Geng, X.; Chen, P. Nonenzymatic Kinetic Resolution of Racemic 2,2,2-Trifluoro-1-Aryl Ethanol via Enantioselective Acylation. *Tetrahedron* **2009**, *65* (11), 2232-2238.
- (11) Nenajdenko, V. G.; Smolko, K. I.; Balenkova, E. S. Enantioselective Reduction of  $\alpha,\beta$ -Unsaturated Ketones Bearing the Trifluoromethyl Group. *Tetrahedron: Asymmetry* **2001**, *12* (9), 1259-1266.
- (12) Yu, J.; Duan, M.; Wu, W.; Qi, X.; Xue, P.; Lan, Y.; Dong, X.-Q.; Zhang, X. Readily Accessible and Highly Efficient Ferrocene-Based Amino-Phosphine-Alcohol (*f*-Amphol) Ligands for Iridium-Catalyzed Asymmetric Hydrogenation of Simple Ketones. *Chem. - Eur. J.* **2017**, *23* (4), 970-975.
- (13) Feng, Z.; Min, Q.-Q.; Xiao, Y.-L.; Zhang, B.; Zhang, X. Palladium-Catalyzed Difluoroalkylation of Aryl Boronic Acids: A New Method for the Synthesis of Aryldifluoromethylated Phosphonates and Carboxylic Acid Derivatives. *Angew. Chem. Int. Ed.* **2014**, *53* (6), 1669-1673.
- (14) Zhao, M. M.; Zhang, H.; Iimura, S.; Bednarz, M. S.; Kanamarlapudi, R. C.; Yan, J.; Lim, N.-

- K.; Wu, W. Process Development of Tryptophan Hydroxylase Inhibitor LX1031, a Drug Candidate for the Treatment of Irritable Bowel Syndrome. *Org. Process Res. Dev.* **2020**, *24* (2), 261-273.
- (15) González-Martínez, D.; Gotor, V.; Gotor-Fernández, V. Chemoenzymatic Synthesis of an Odanacatib Precursor through a Suzuki-Miyaura Cross-Coupling and Bioreduction Sequence. *ChemCatChem* **2019**, *11* (23), 5800-5807.
- (16) de Oliveira Lopes, R.; de Miranda, A. S.; Reichart, B.; Glasnov, T.; Kappe, C. O.; Simon, R. C.; Kroutil, W.; Miranda, L. S. M.; Leal, I. C. R.; de Souza, R. O. M. A. Combined Batch and Continuous Flow Procedure to the Chemo-Enzymatic Synthesis of Biaryl Moiety of Odanacatib. *J. Mol. Catal. B: Enzym.* **2014**, *104*, 101-107.

### VIII. NMR spectrum

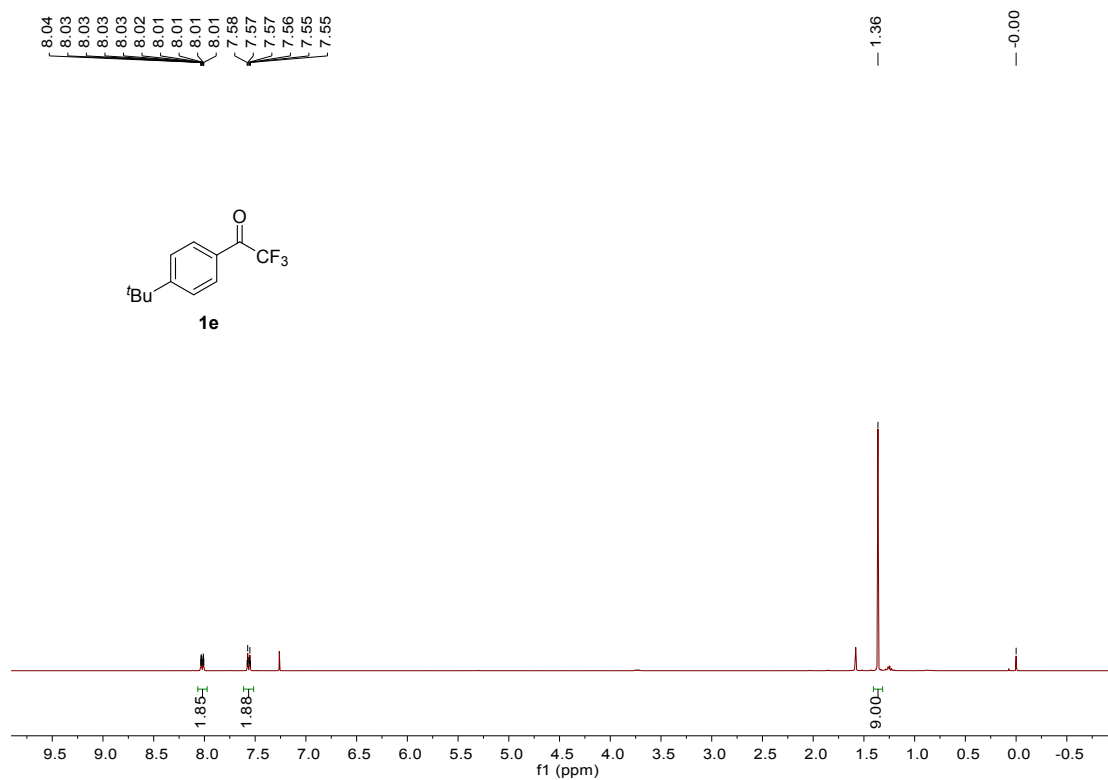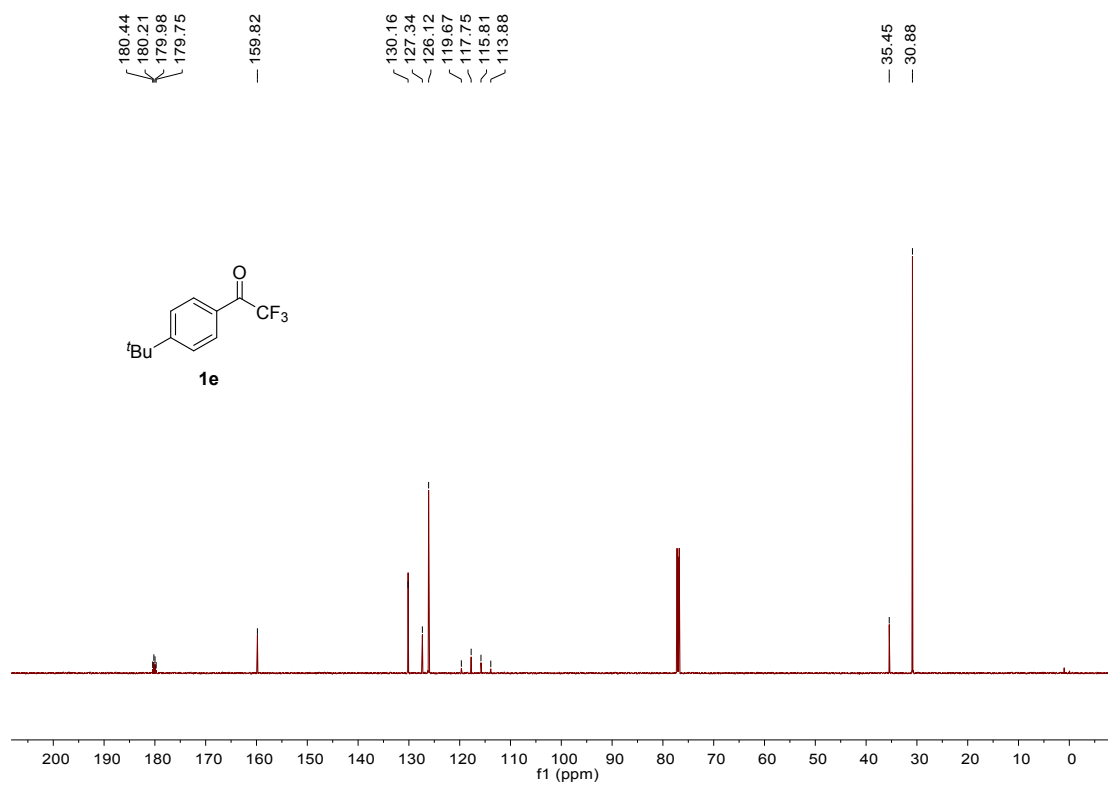

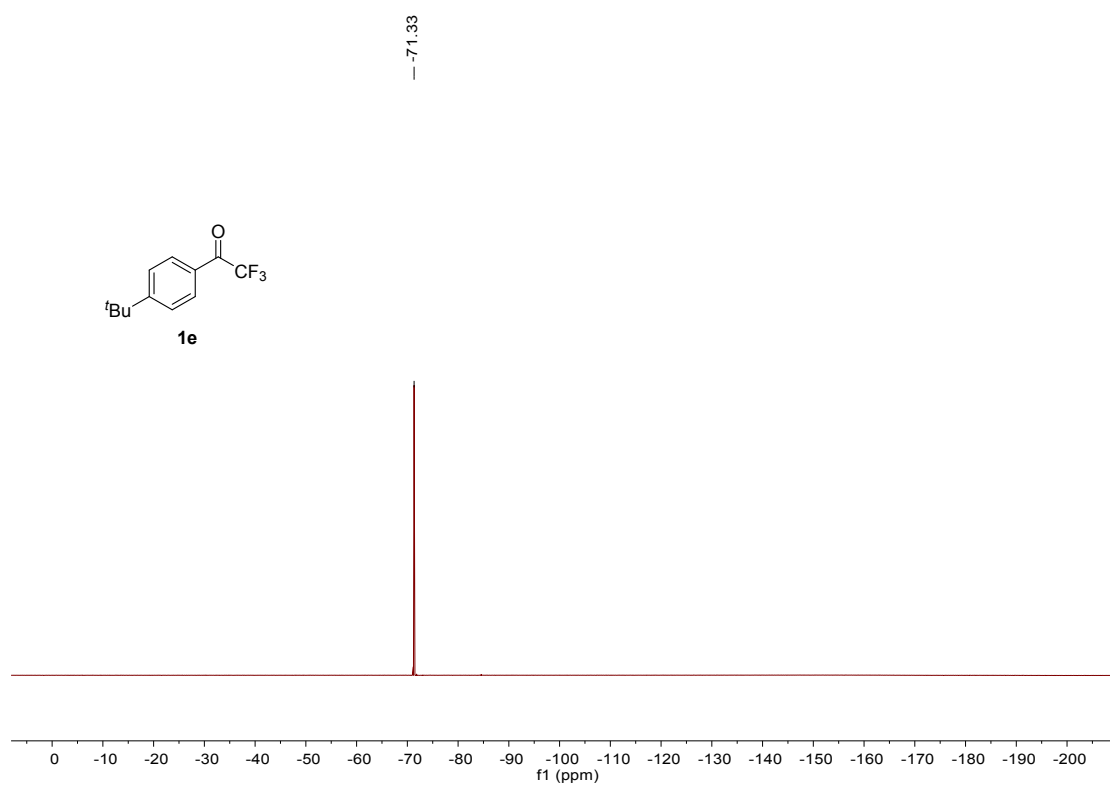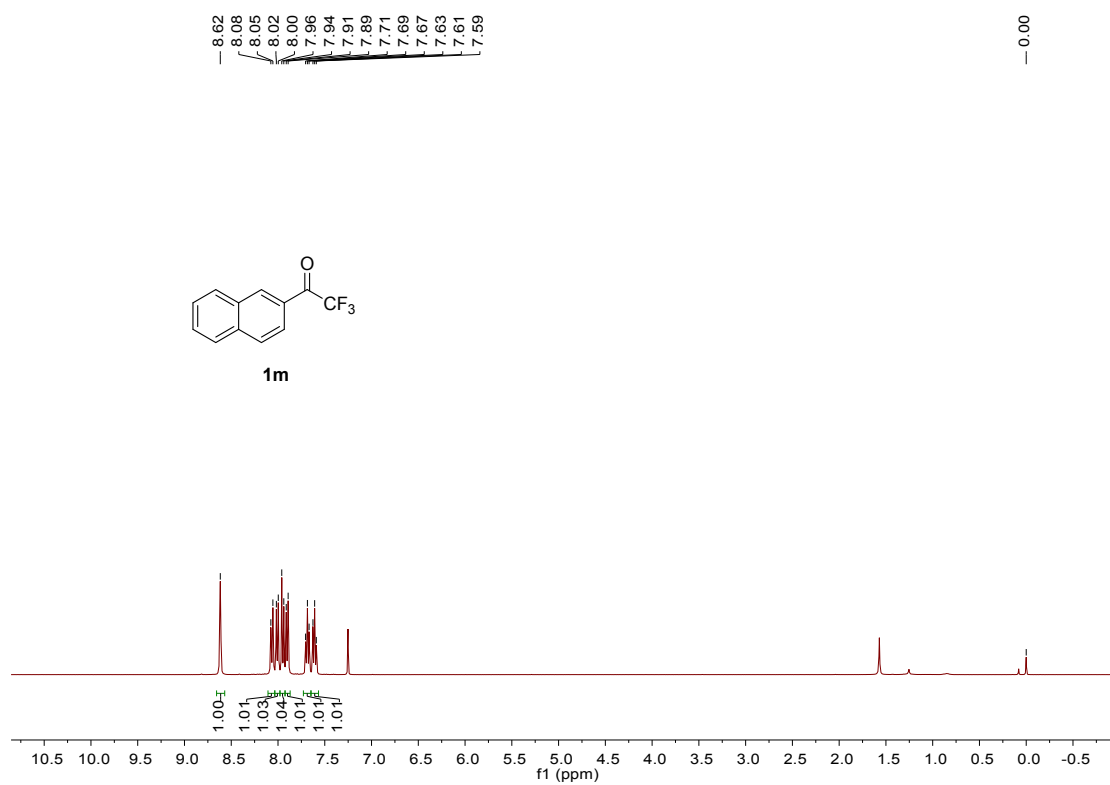

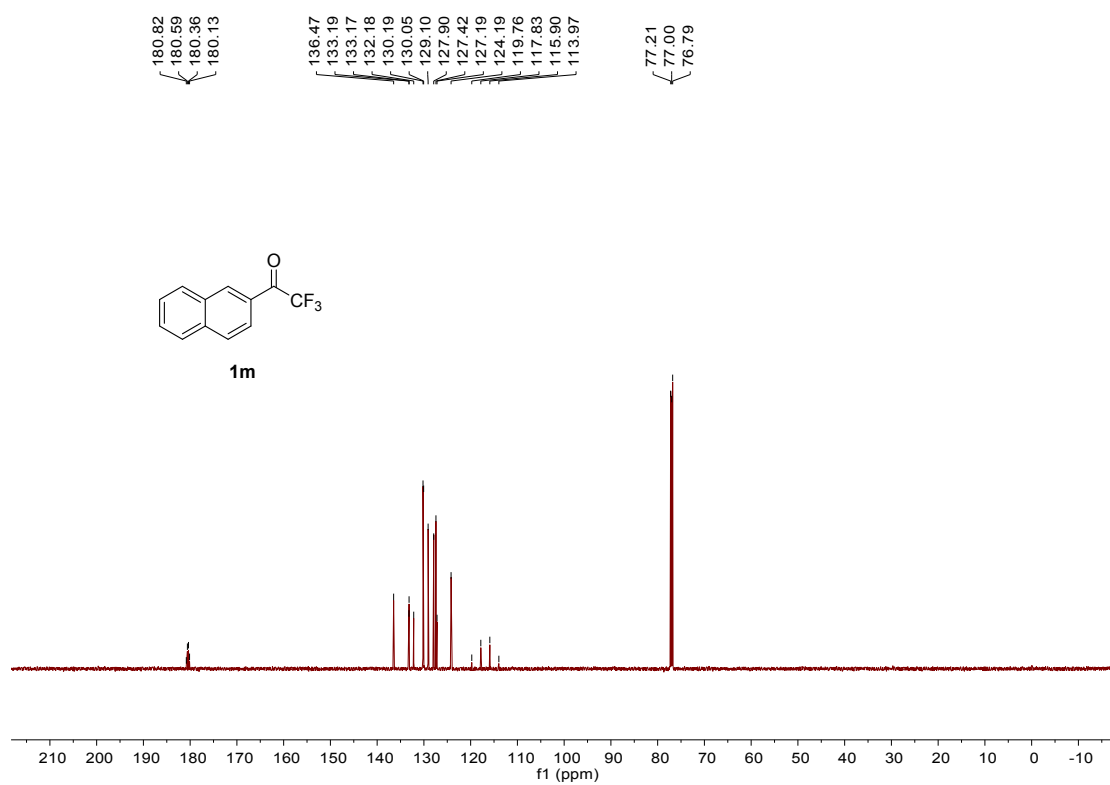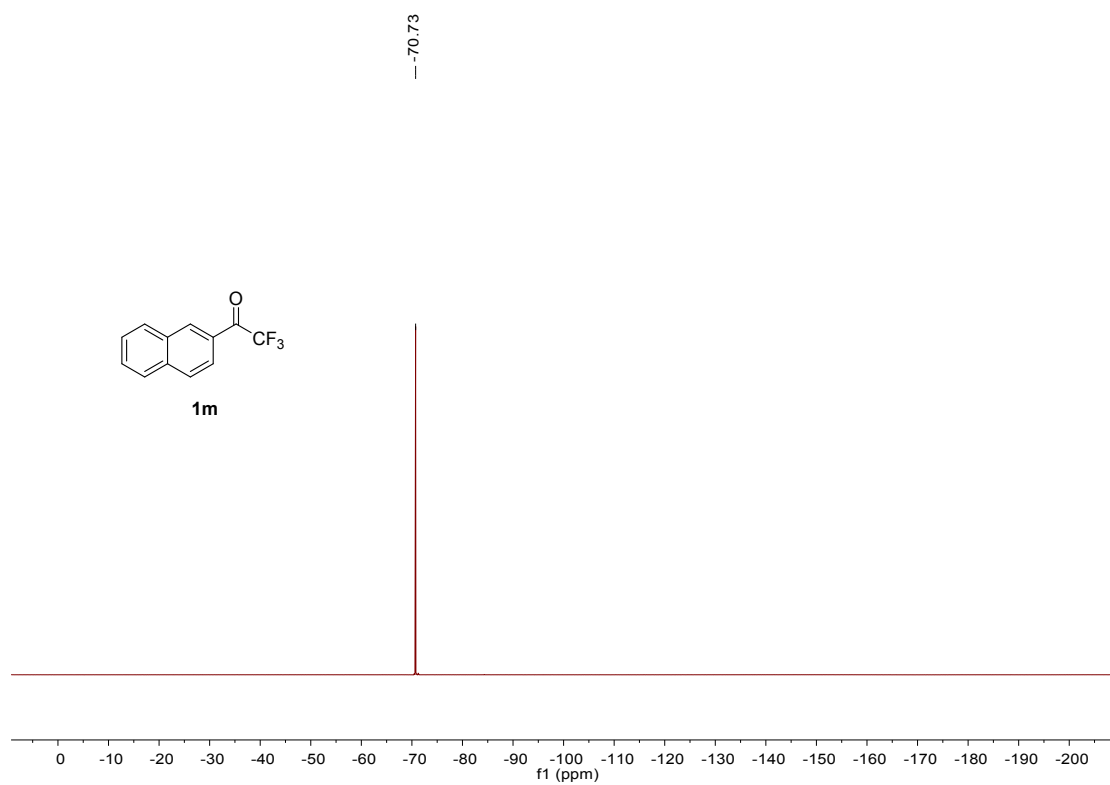

8.79  
8.77  
8.13  
8.11  
8.01  
7.99  
7.80  
7.78  
7.61  
7.61  
7.59  
7.59  
7.58  
7.57  
7.57  
7.52  
7.52  
7.50  
7.50  
7.49  
7.48  
7.48  
7.45  
7.43  
7.41

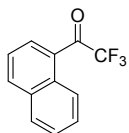

1n

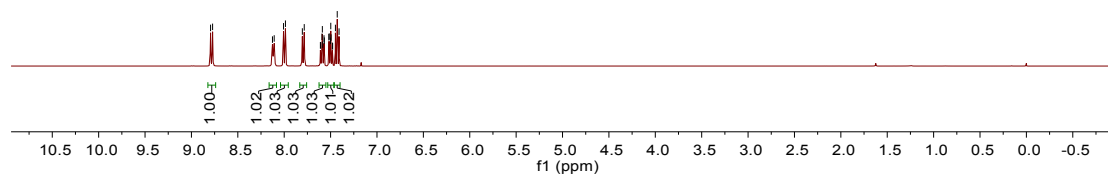

182.66  
182.32  
181.99  
181.65  
136.11  
133.85  
131.69  
131.65  
131.61  
131.57  
131.07  
129.37  
128.90  
127.00  
126.12  
125.06  
124.00  
121.02  
118.11  
115.20  
112.29  
77.32  
77.00  
76.68

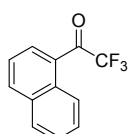

1n

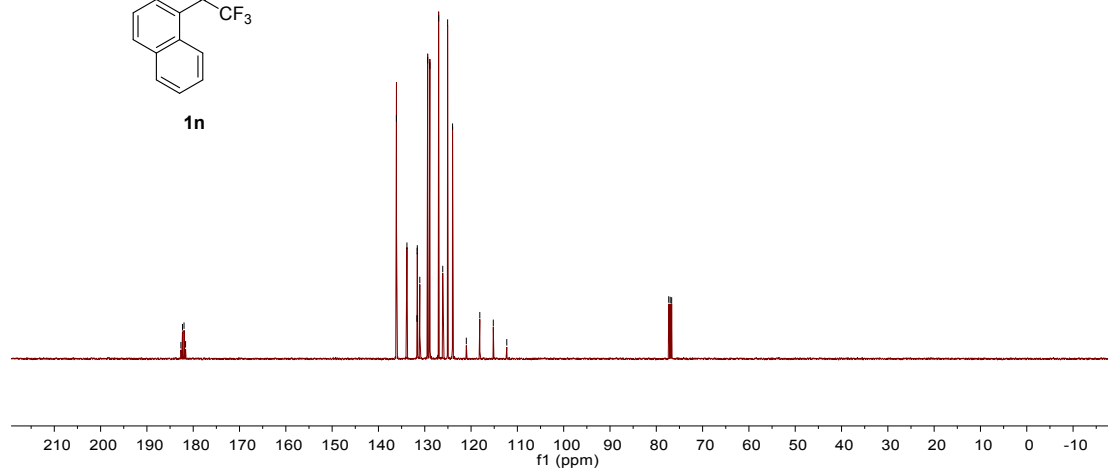

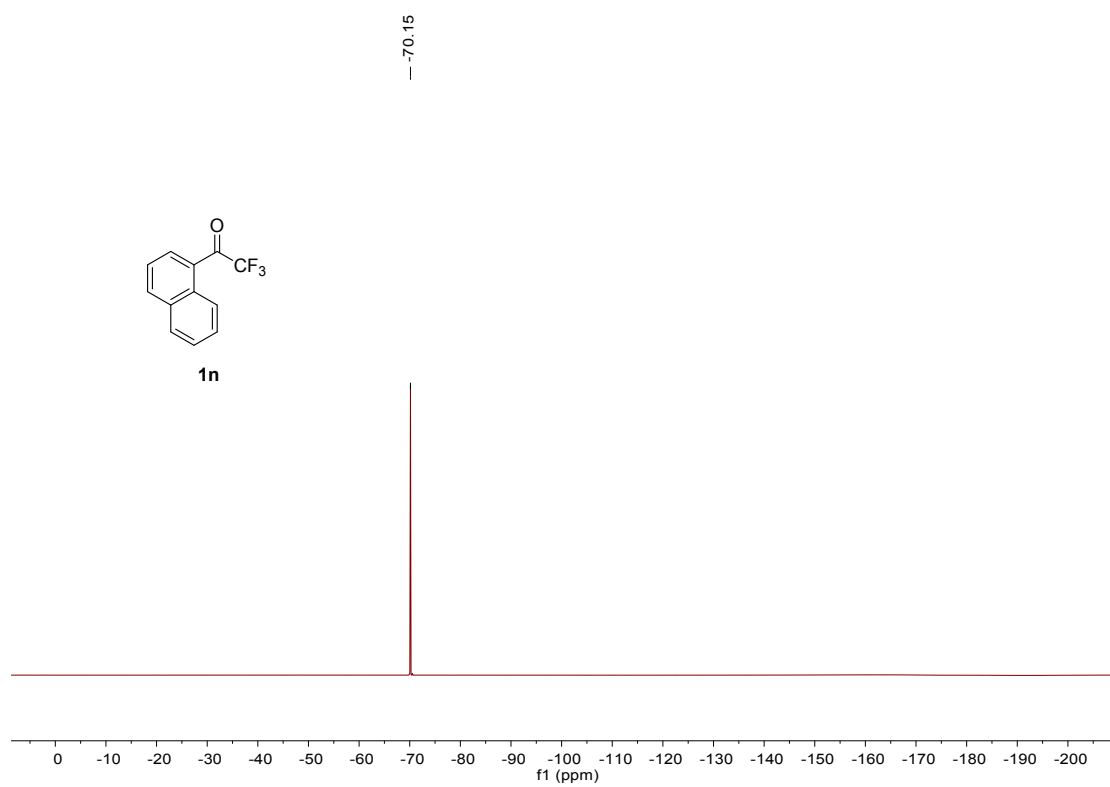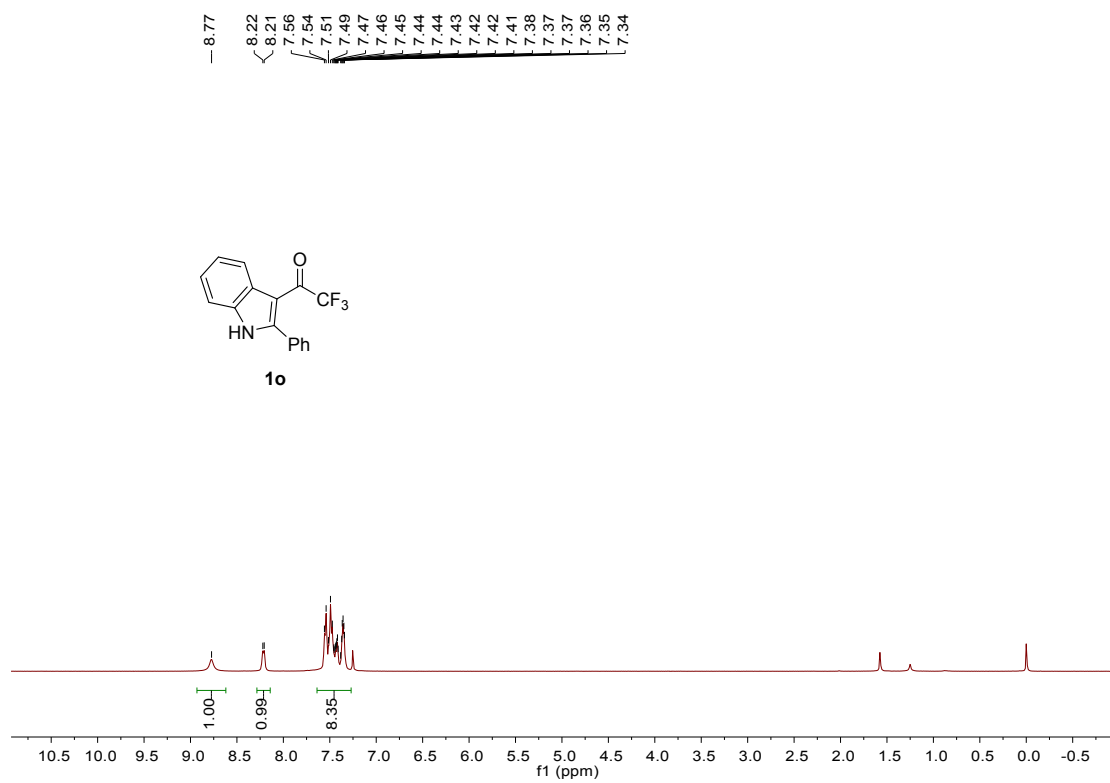



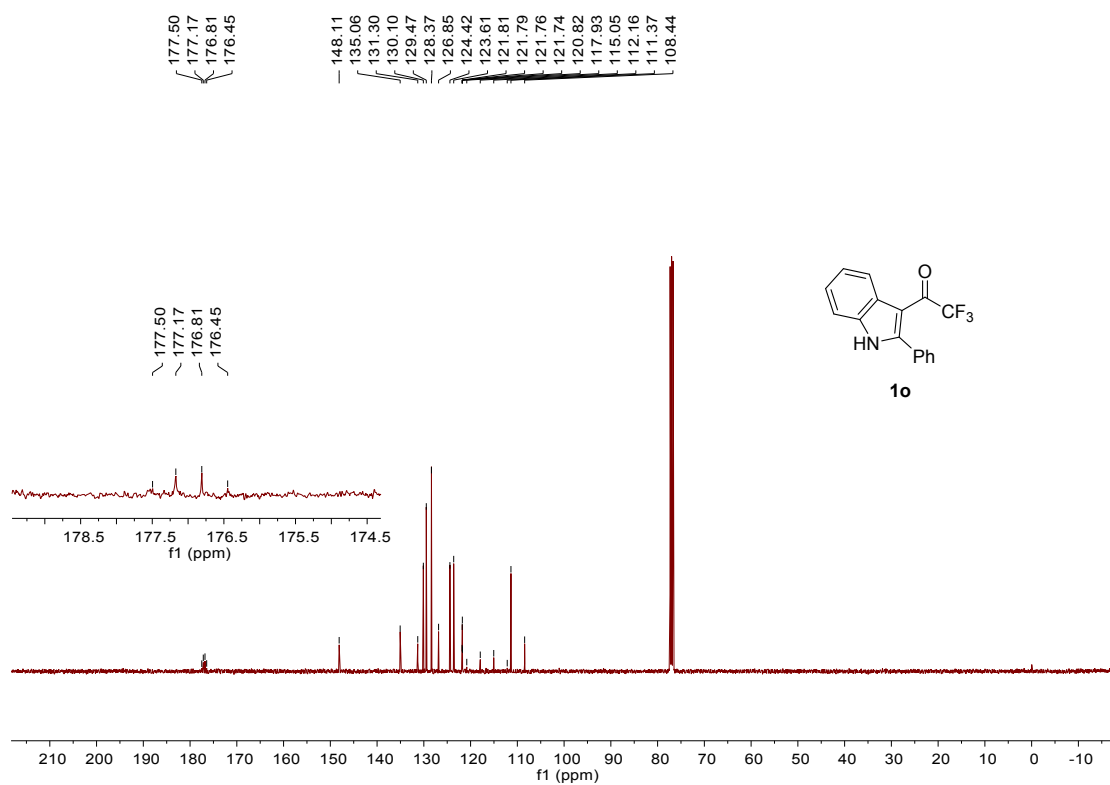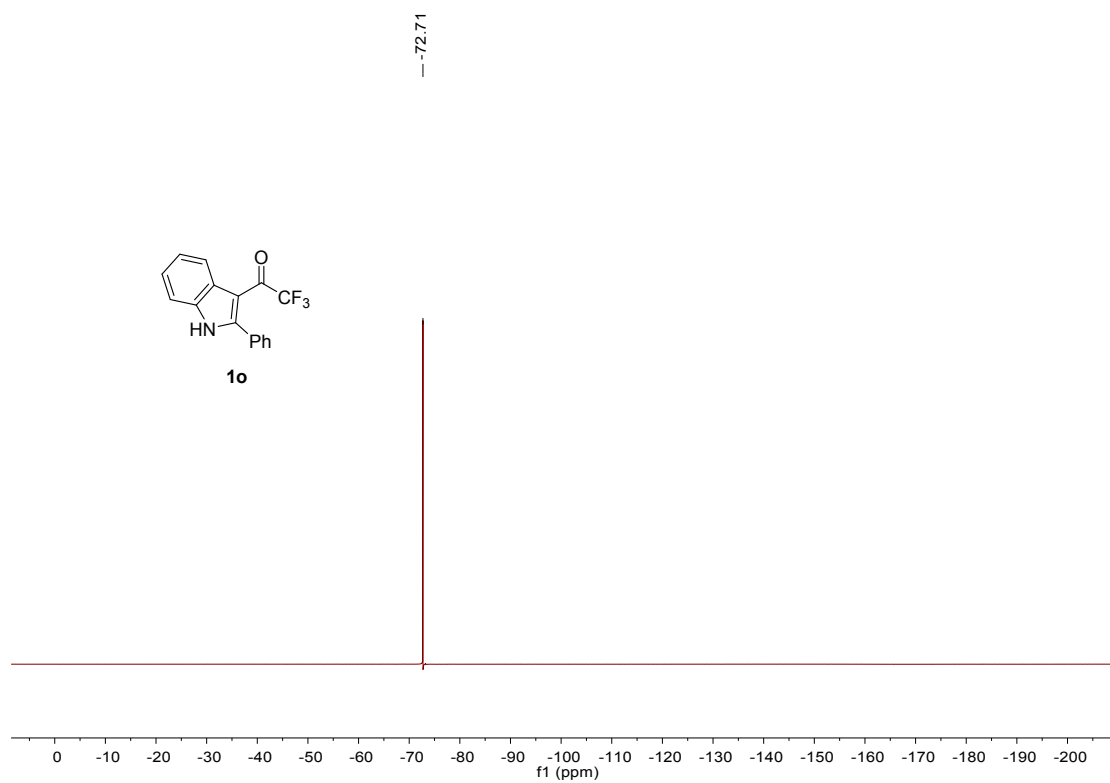

7.99  
7.95  
7.65  
7.63  
7.63  
7.50  
7.49  
7.49  
7.48  
7.47  
7.45  
7.45  
7.44  
7.43  
7.04  
7.00

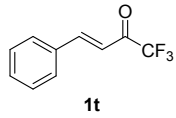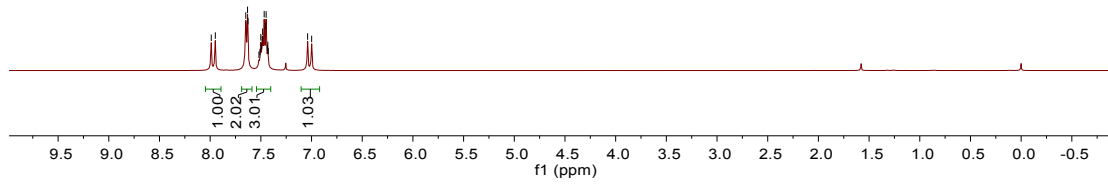

180.53  
180.17  
179.82  
179.47  
150.14  
133.30  
132.32  
129.22  
120.70  
117.81  
116.61  
114.92  
112.03  
77.32  
77.00  
76.68

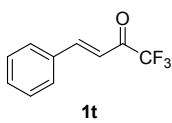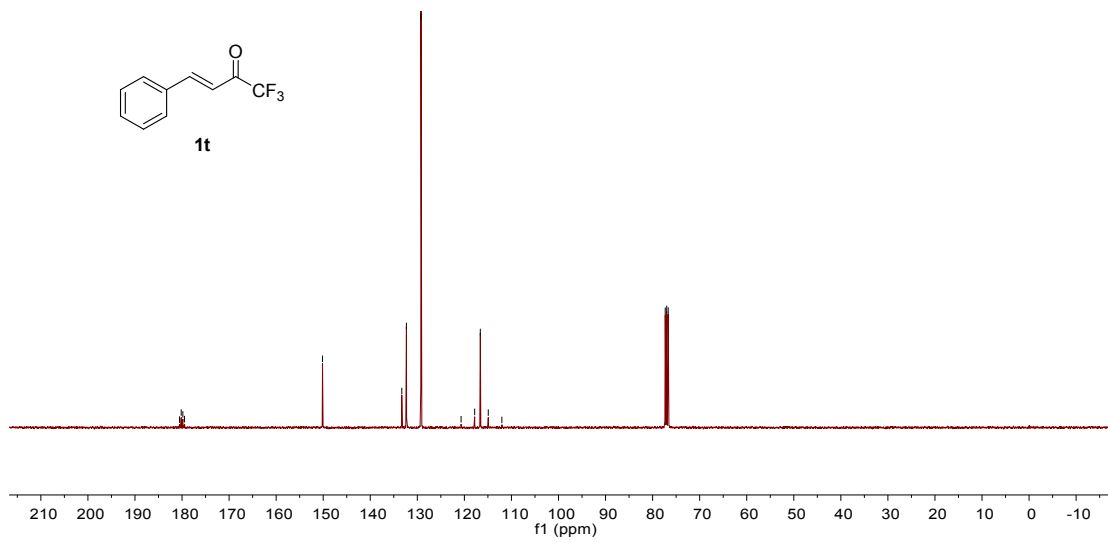

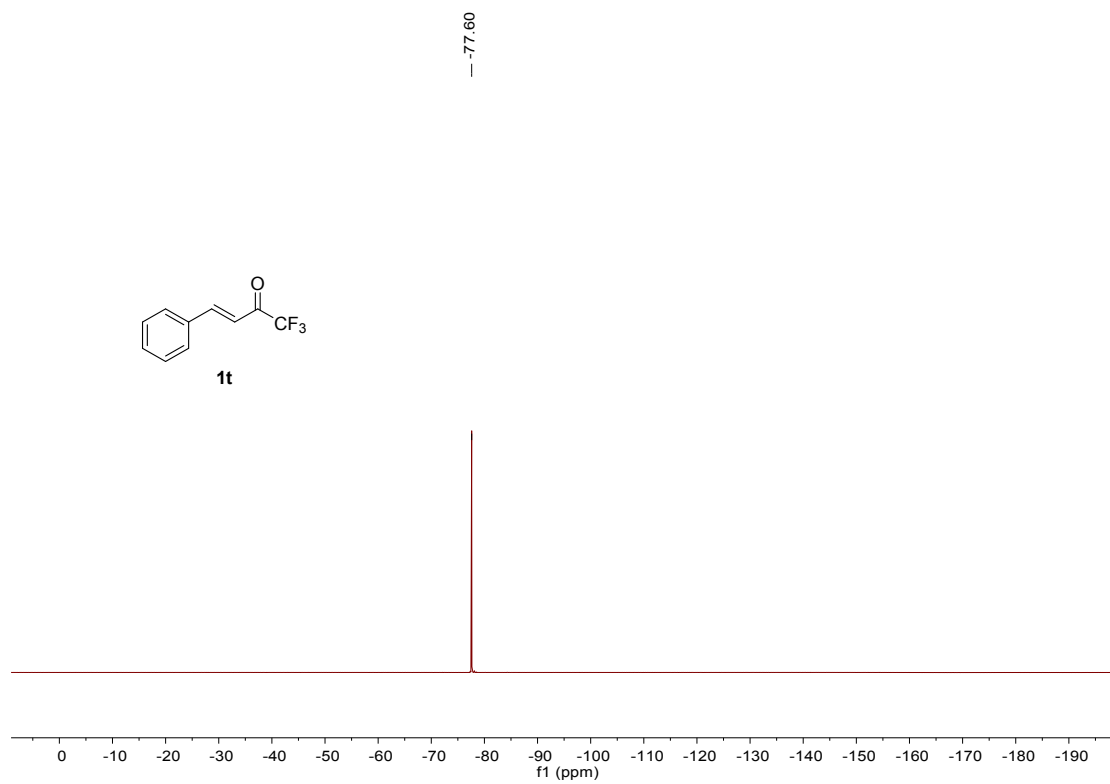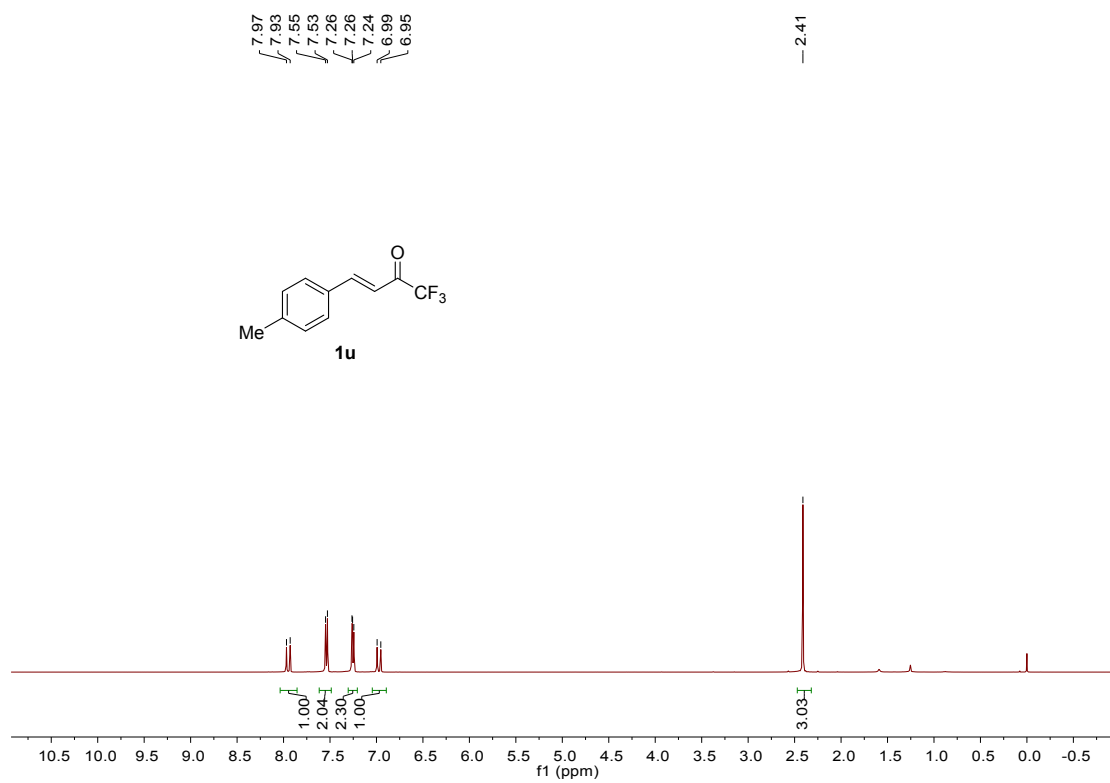

180.55  
180.20  
179.85  
179.50

150.24  
143.35

130.67  
129.99  
129.33  
120.78  
117.89  
115.55  
114.99  
112.10

77.32  
77.00  
76.68

21.68

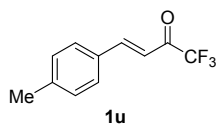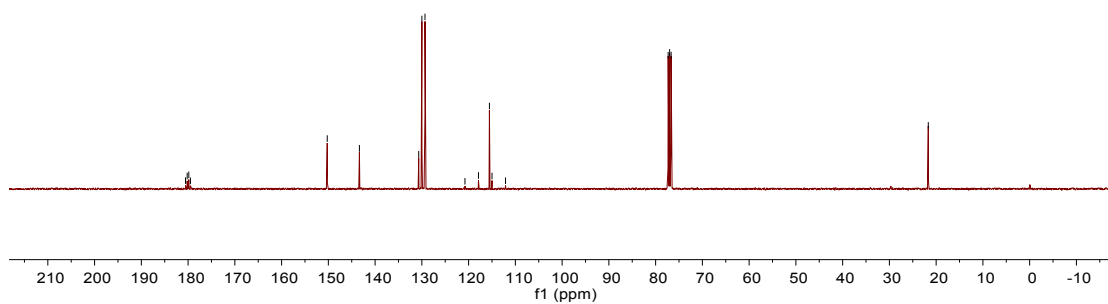

-77.54

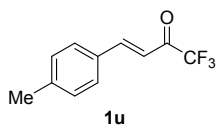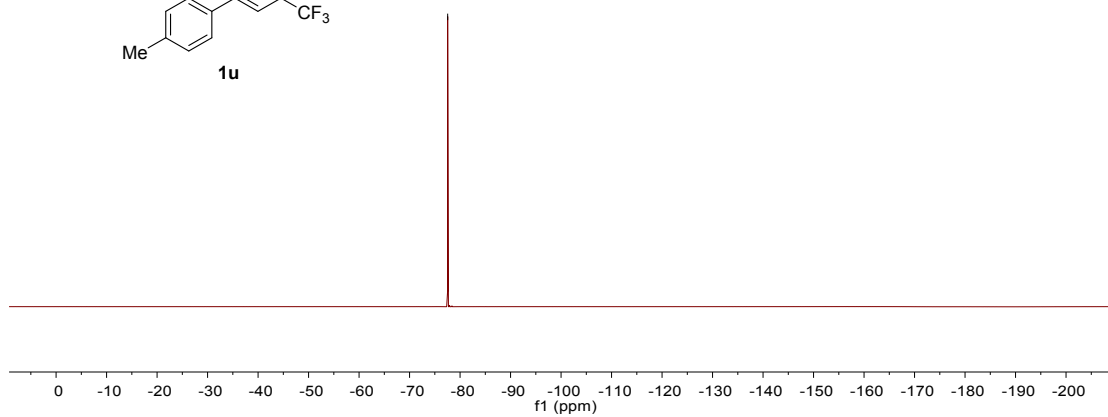

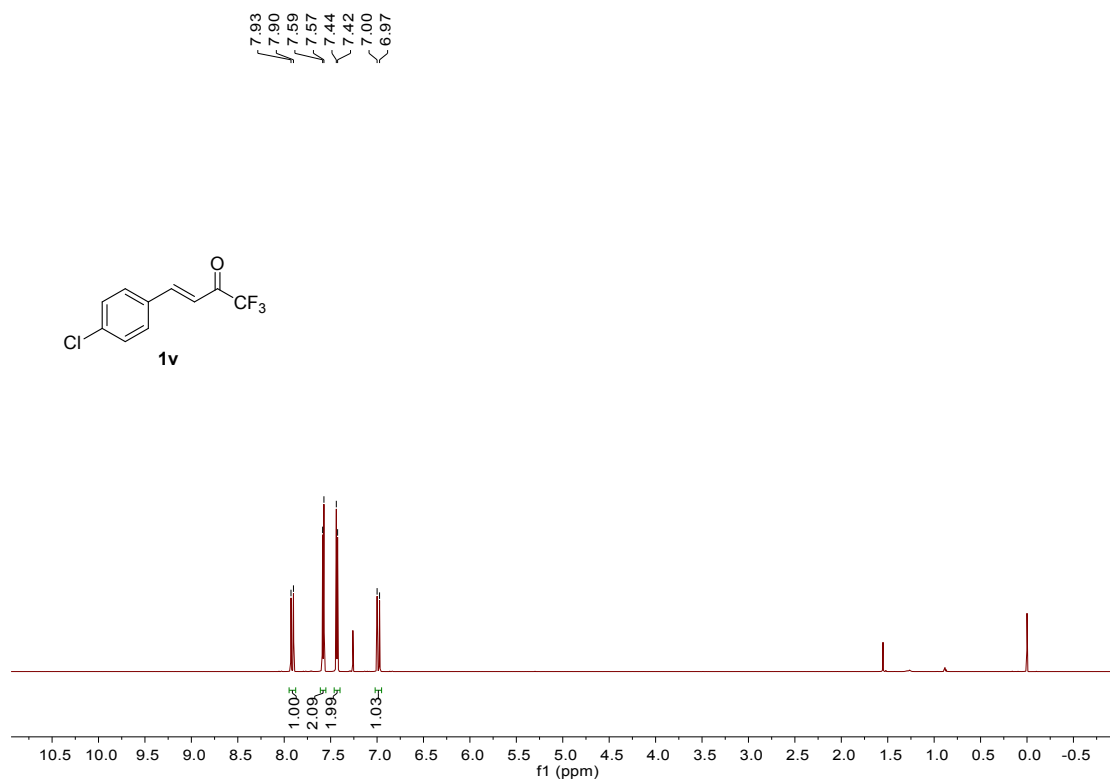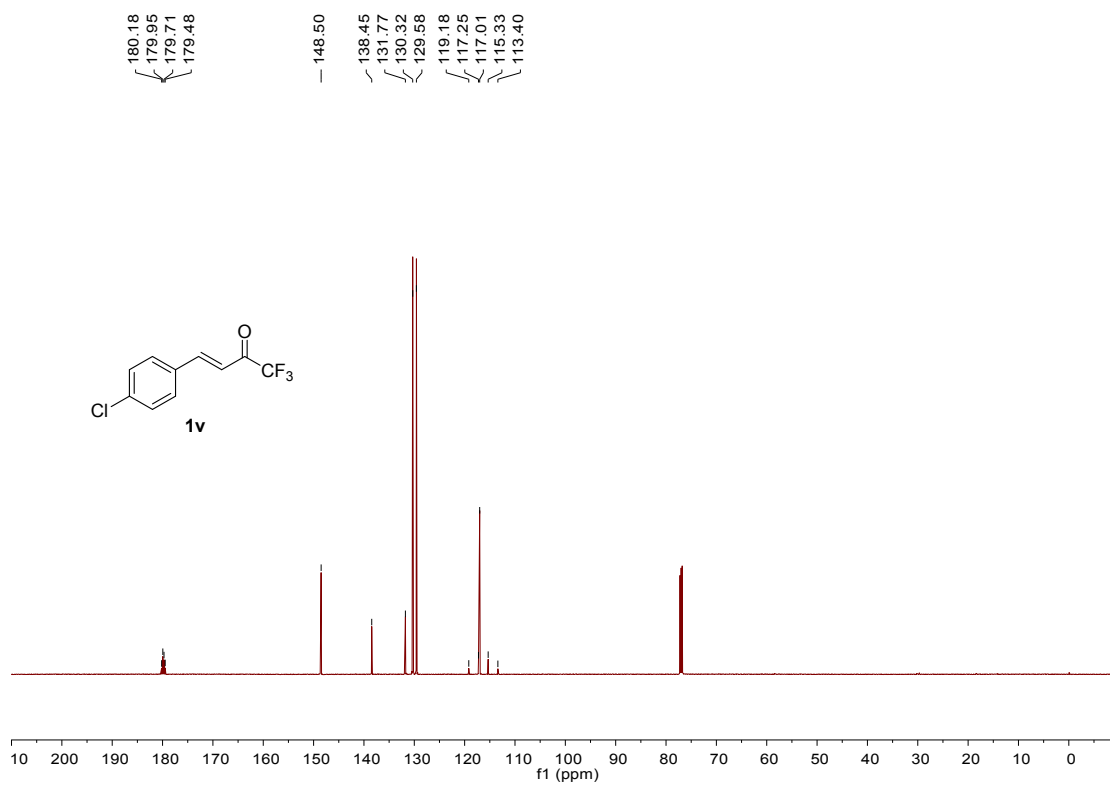

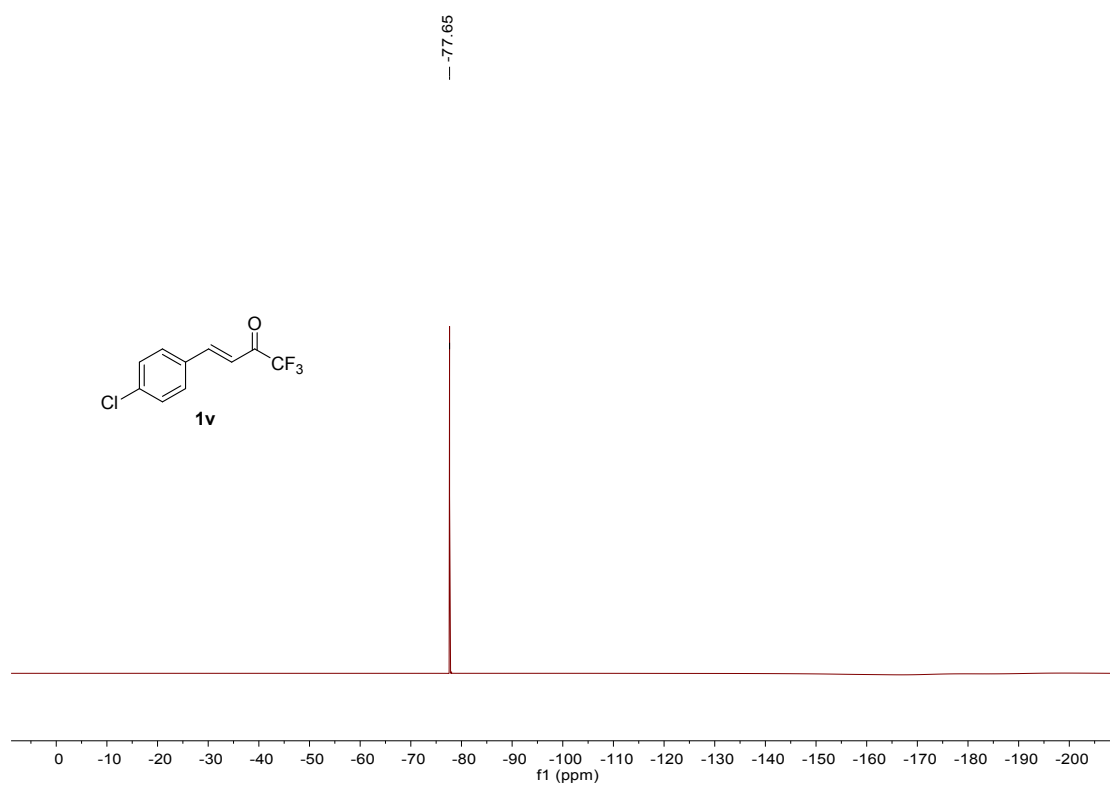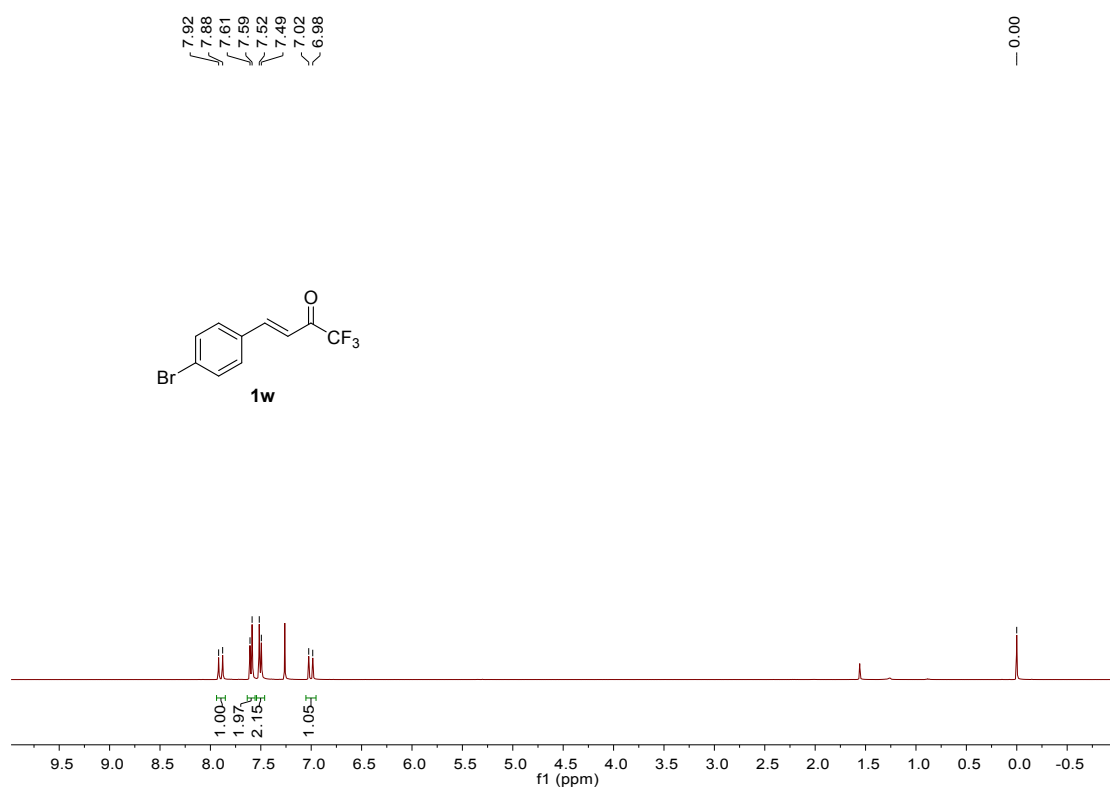

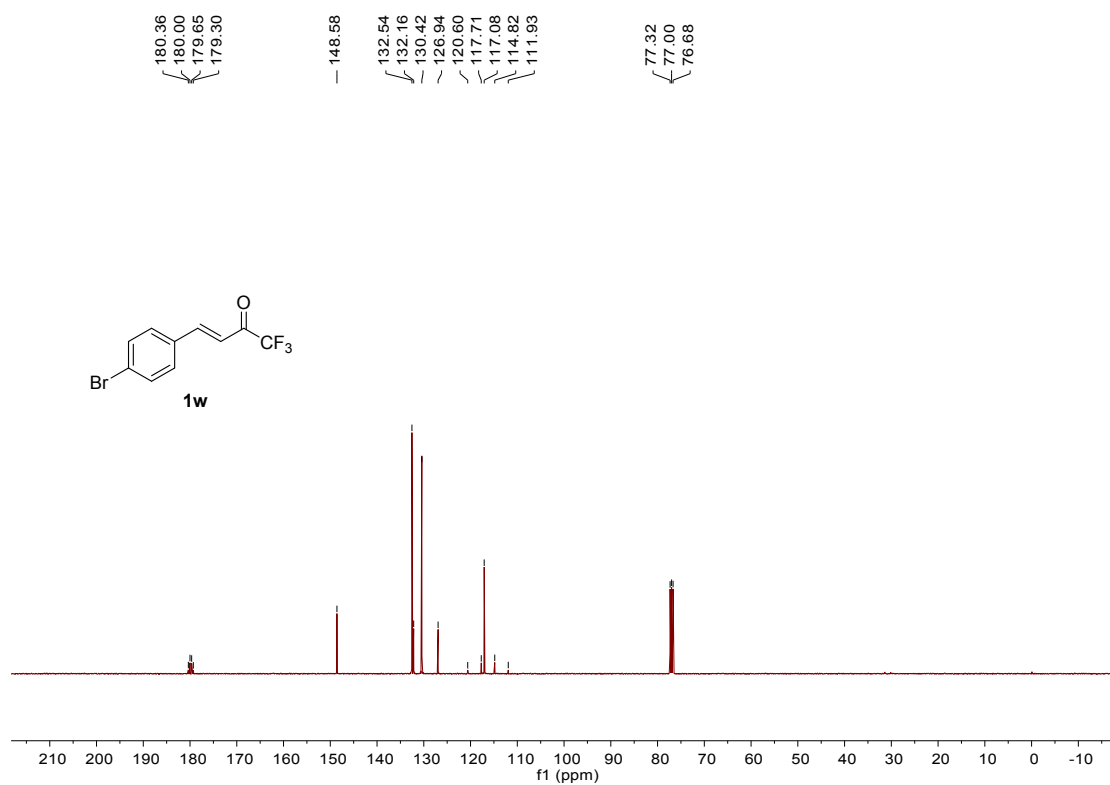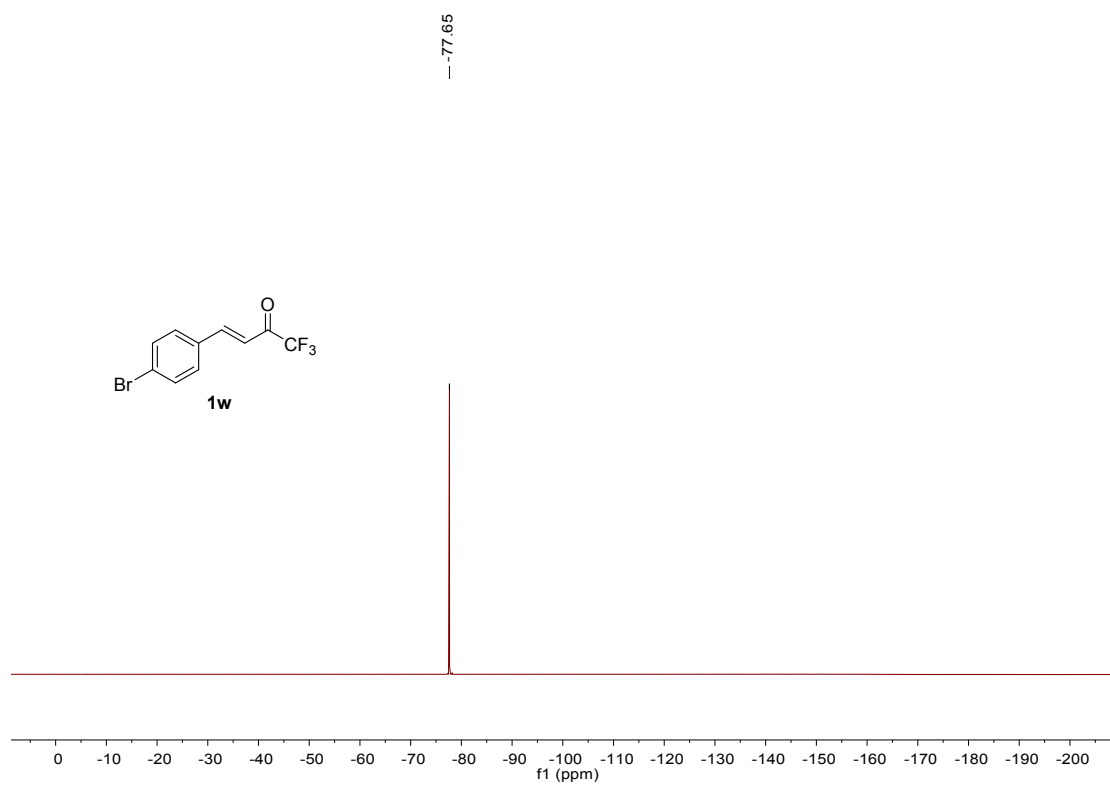

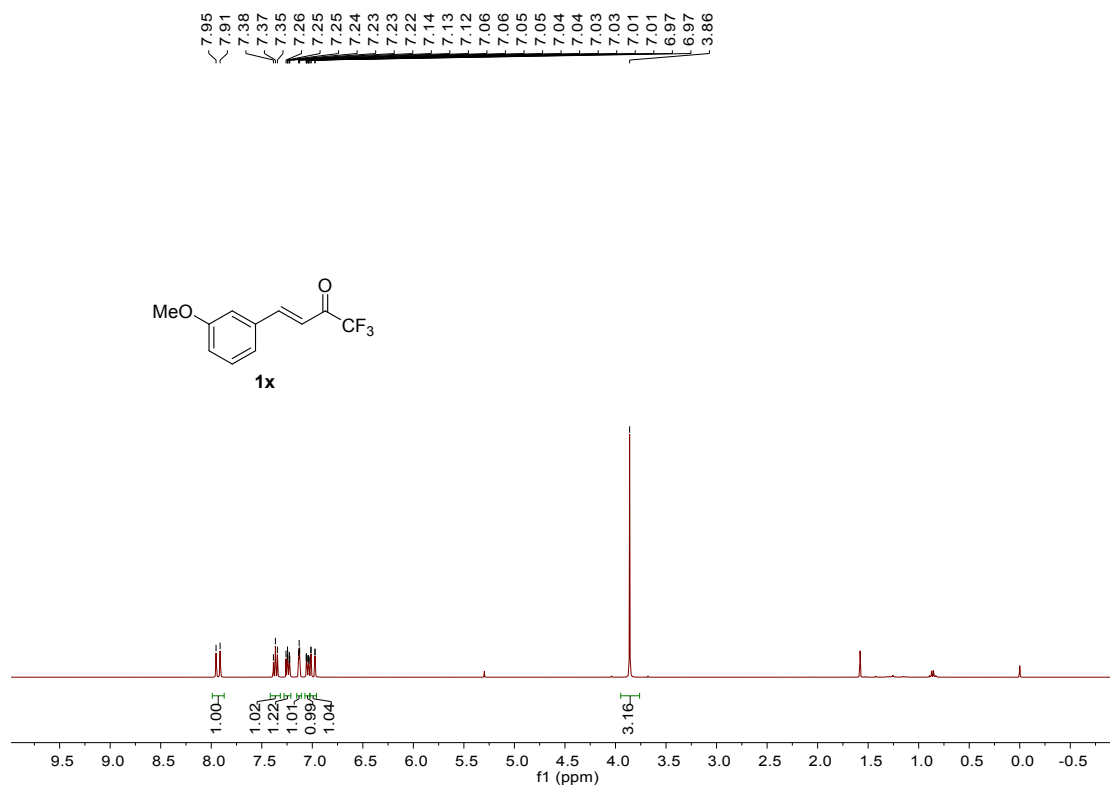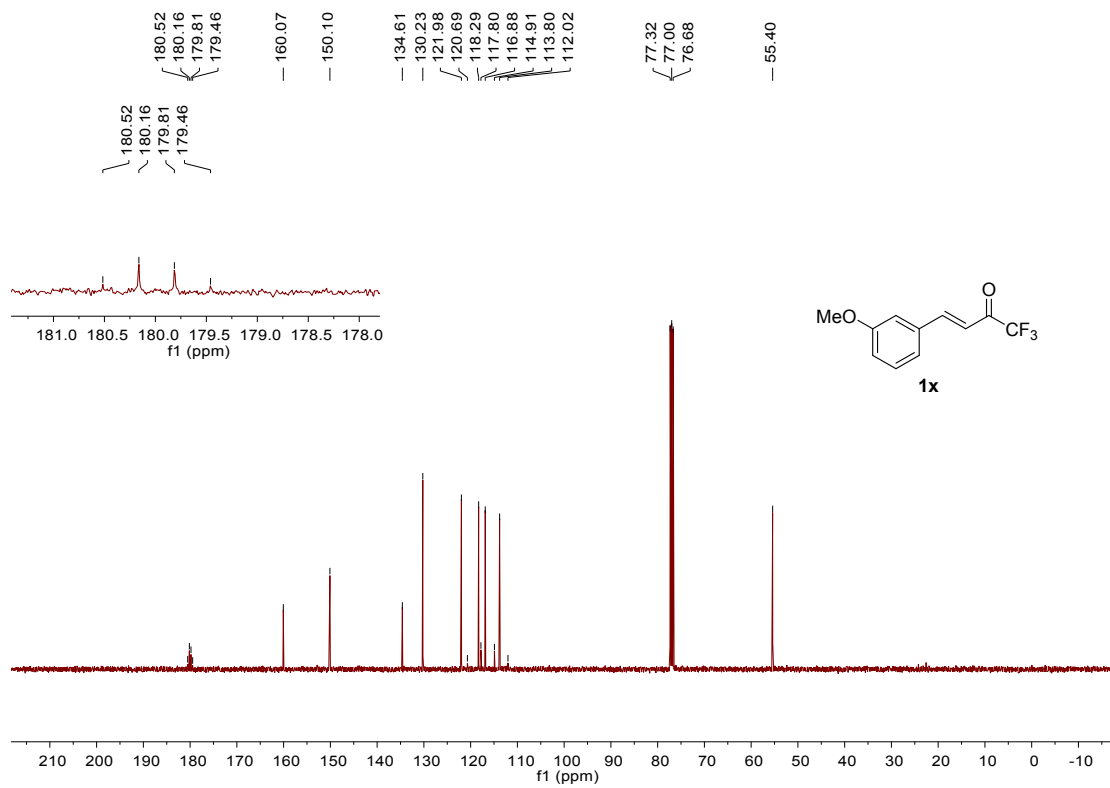



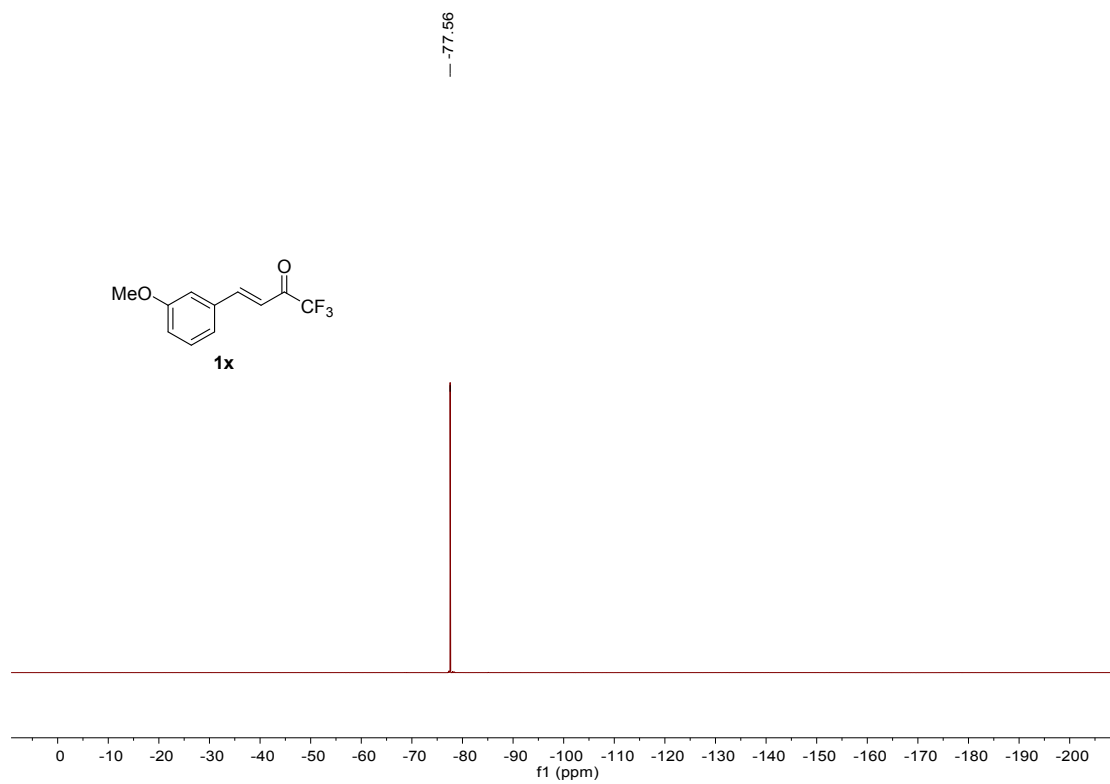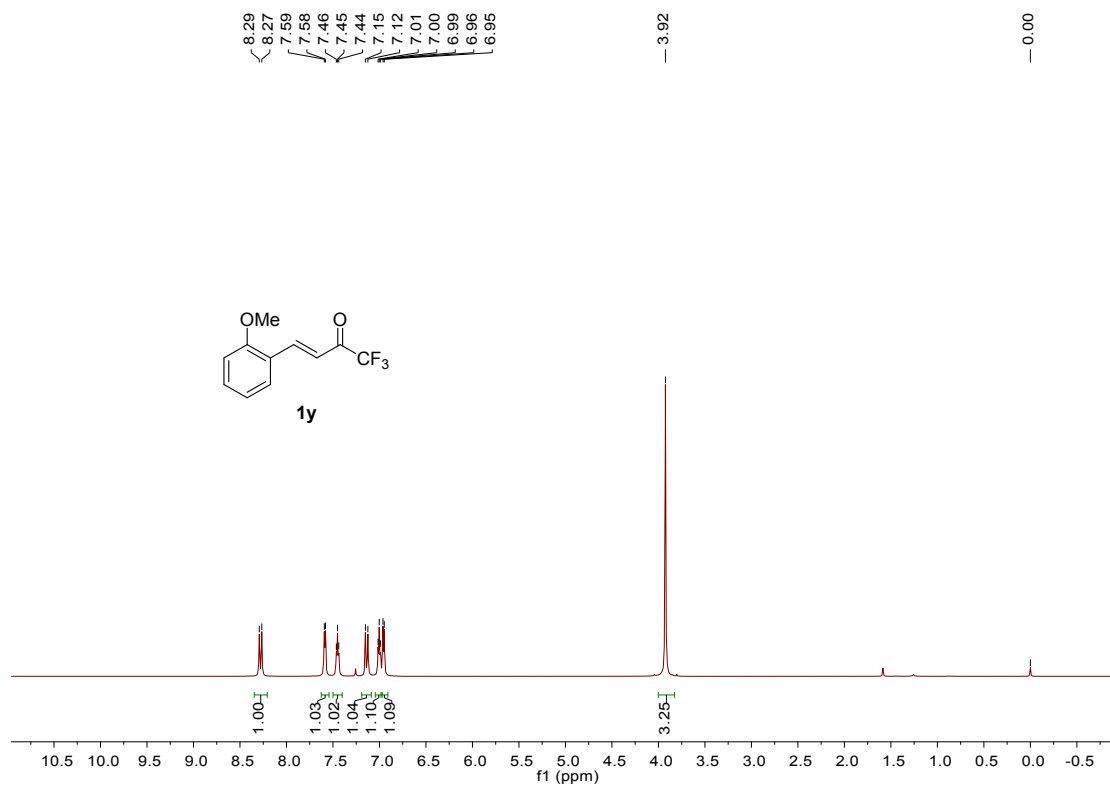

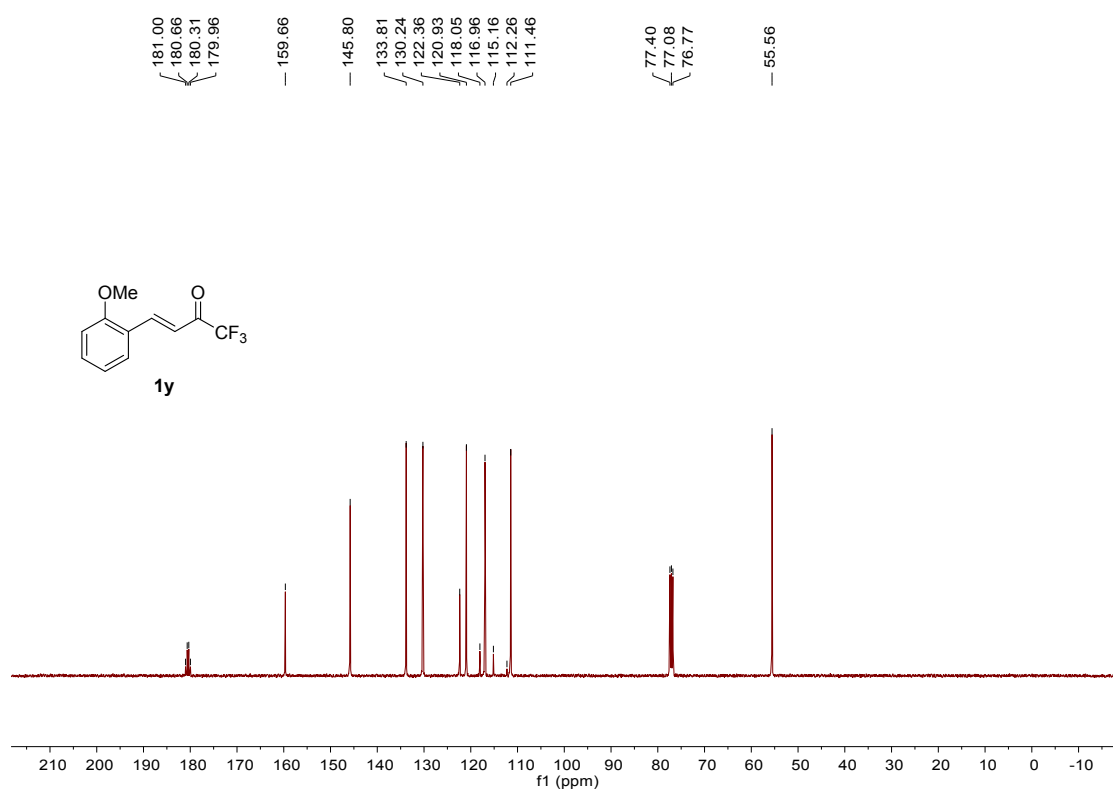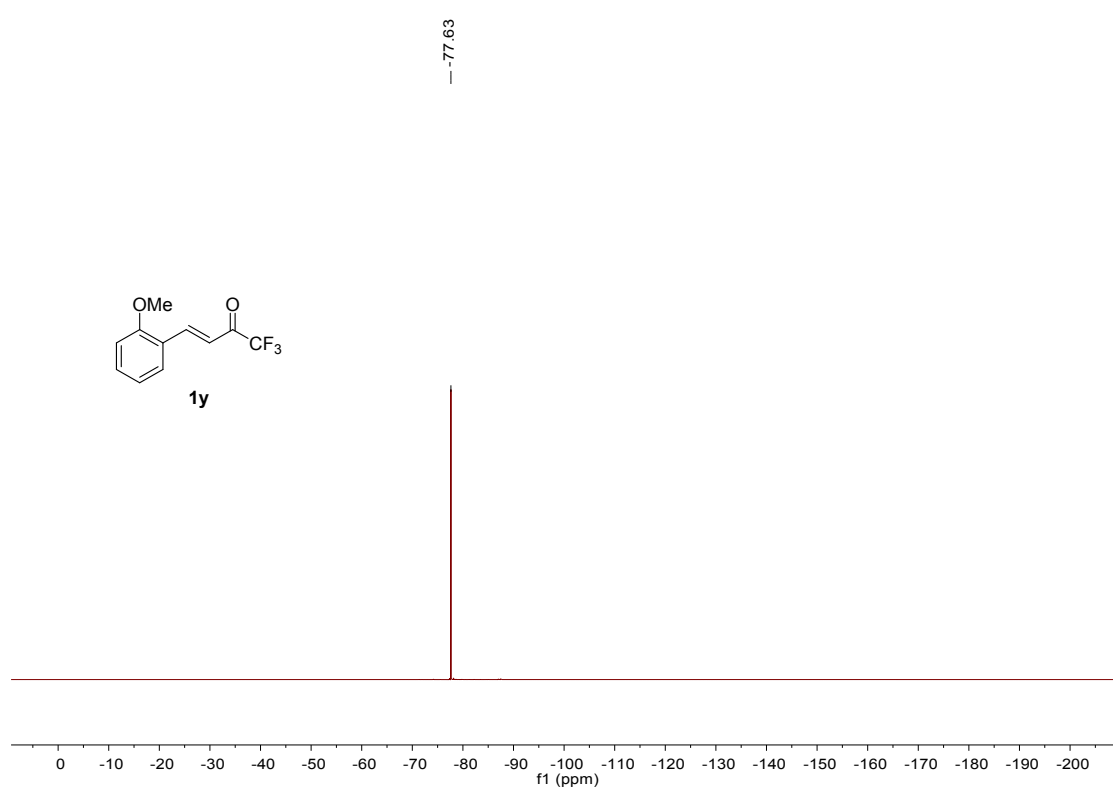

7.74  
7.49  
7.47  
7.45  
7.43  
7.41

-2.17

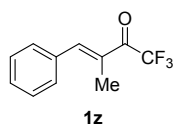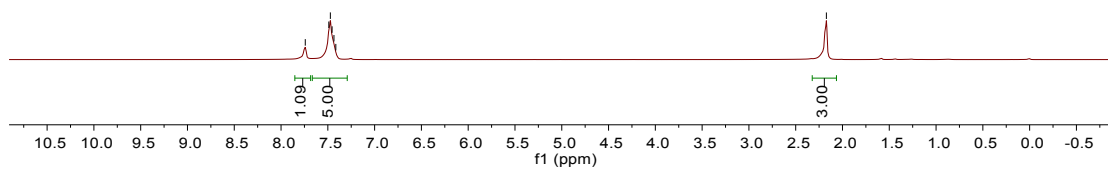

182.86  
182.68  
182.53  
182.35  
182.20  
181.87  
146.01  
145.97  
145.94  
145.90  
145.86  
145.82  
145.79  
145.75  
134.63  
131.10  
130.95  
130.48  
130.32  
130.12  
129.97  
128.87  
128.71  
121.37  
121.22  
118.47  
118.31  
115.57  
115.41  
112.67  
112.51

13.43  
13.28

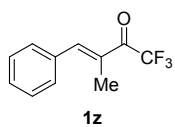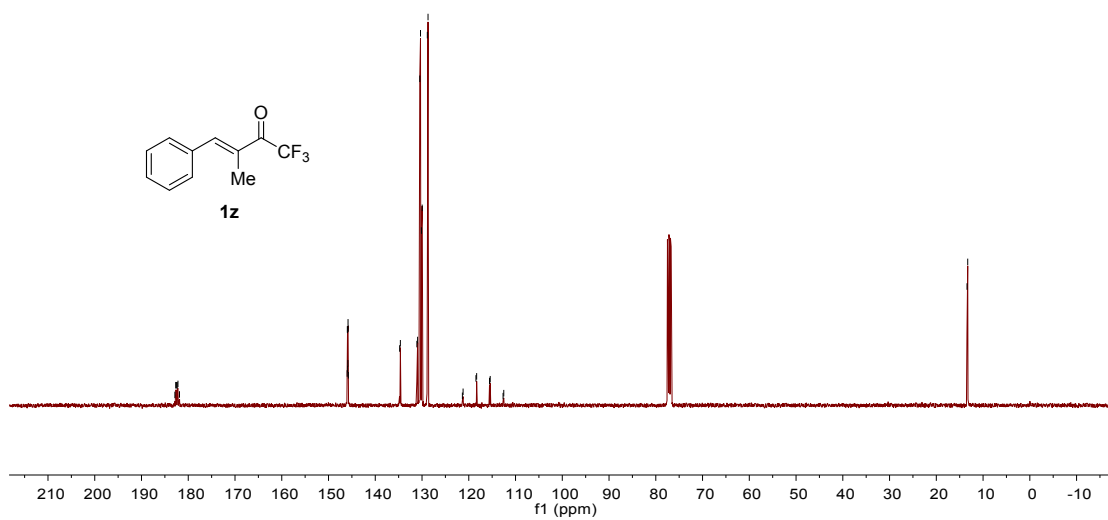

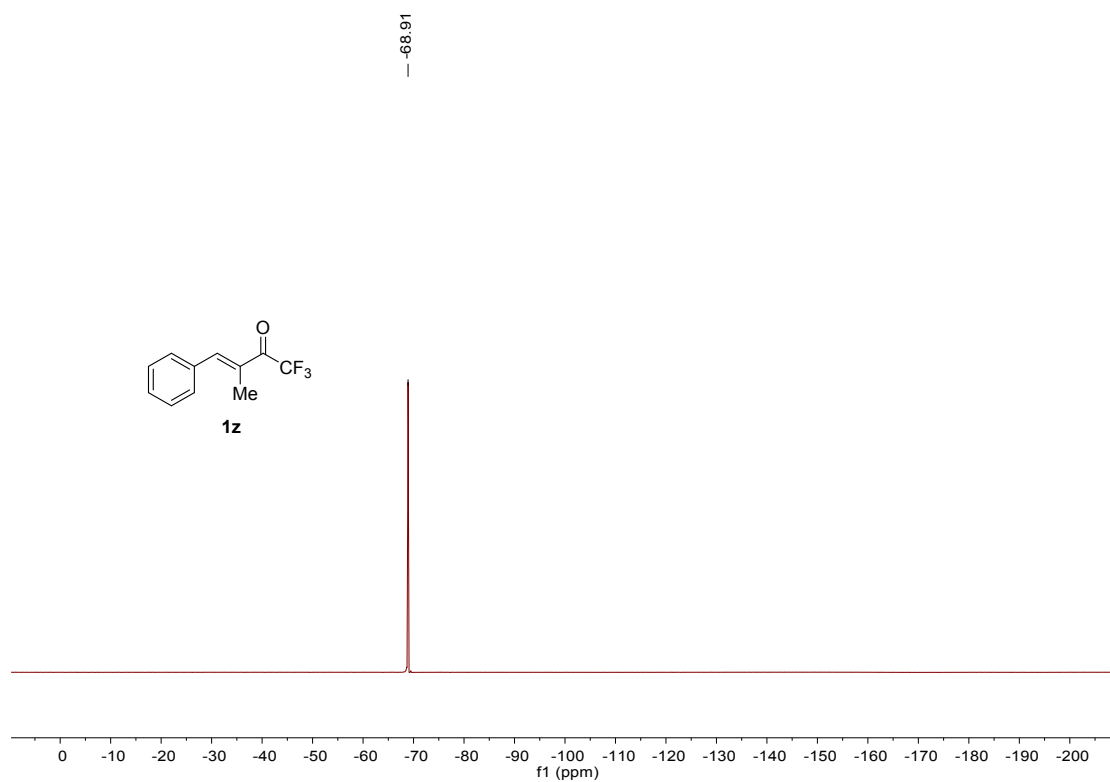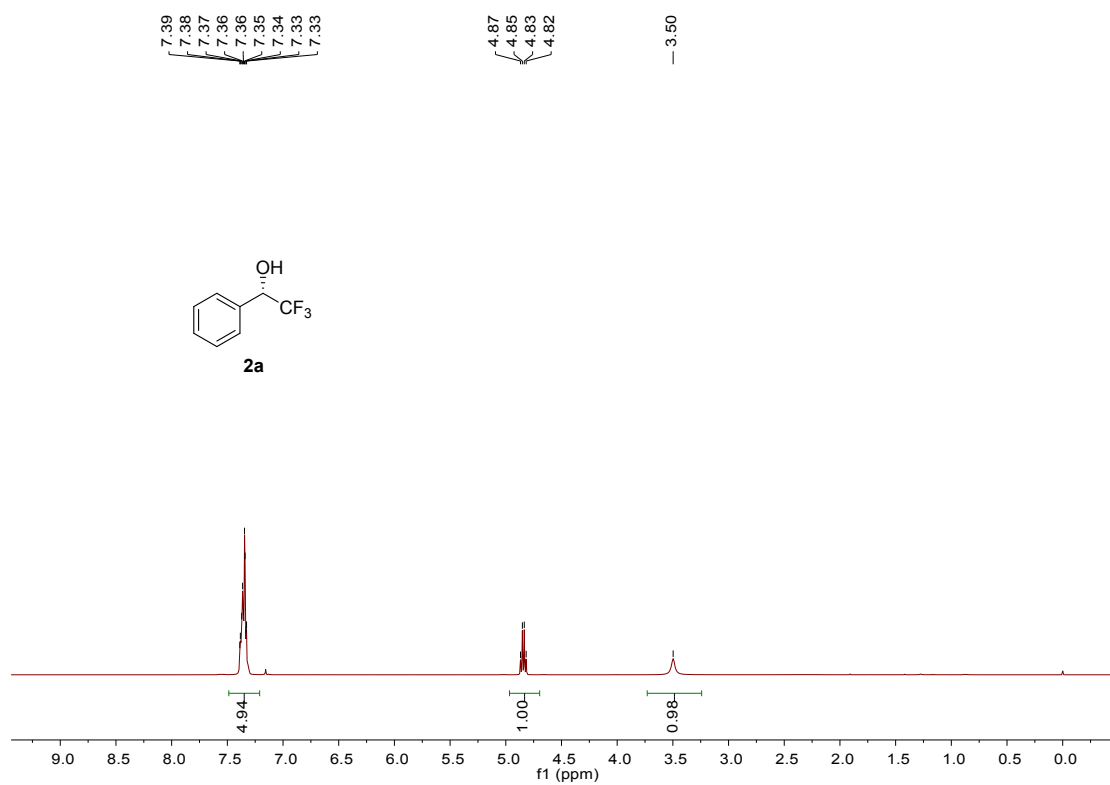

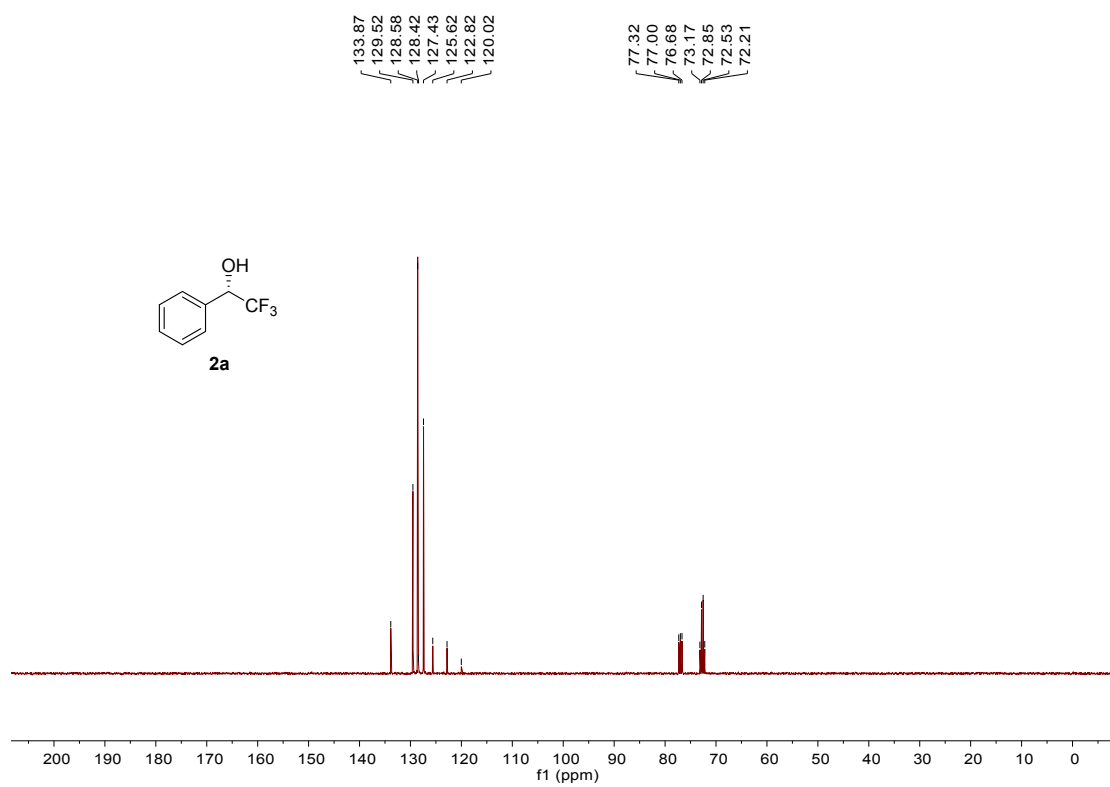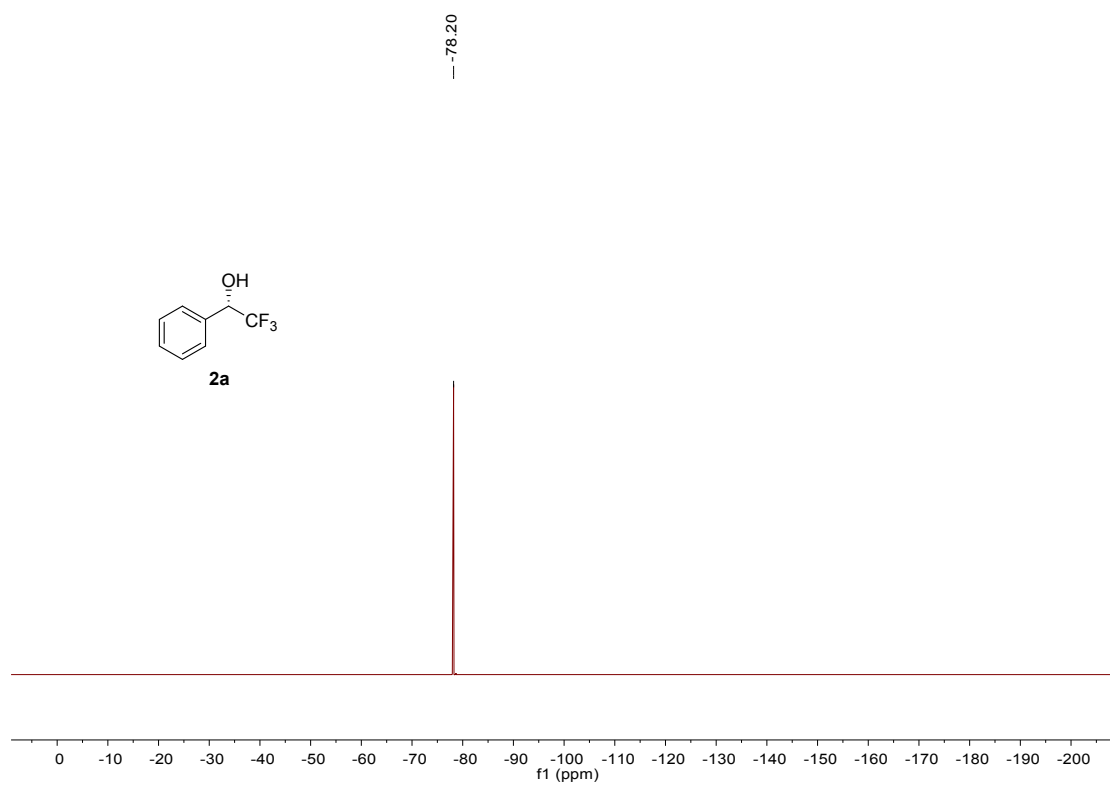

7.37  
7.35  
7.26  
7.23  
7.21

5.01  
5.00  
4.99  
4.98  
4.97  
4.96  
4.95

2.64  
2.63  
2.37

-0.00

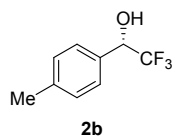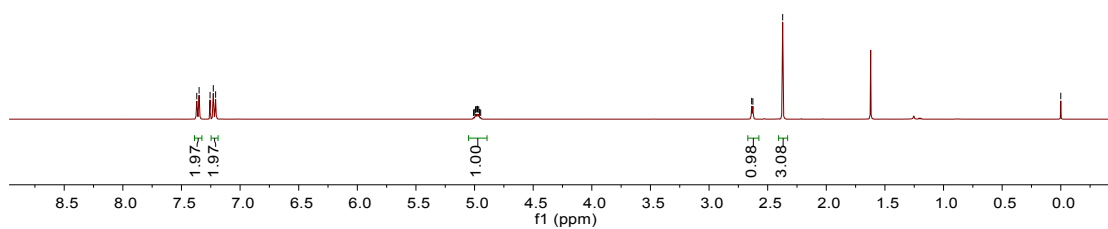

139.56  
131.06  
129.33  
128.50  
127.32  
125.71  
122.91  
120.09

77.32  
77.00  
76.68  
73.20  
73.17  
72.88  
72.85  
72.57  
72.53  
72.25  
72.21

21.19  
21.15

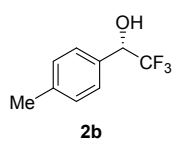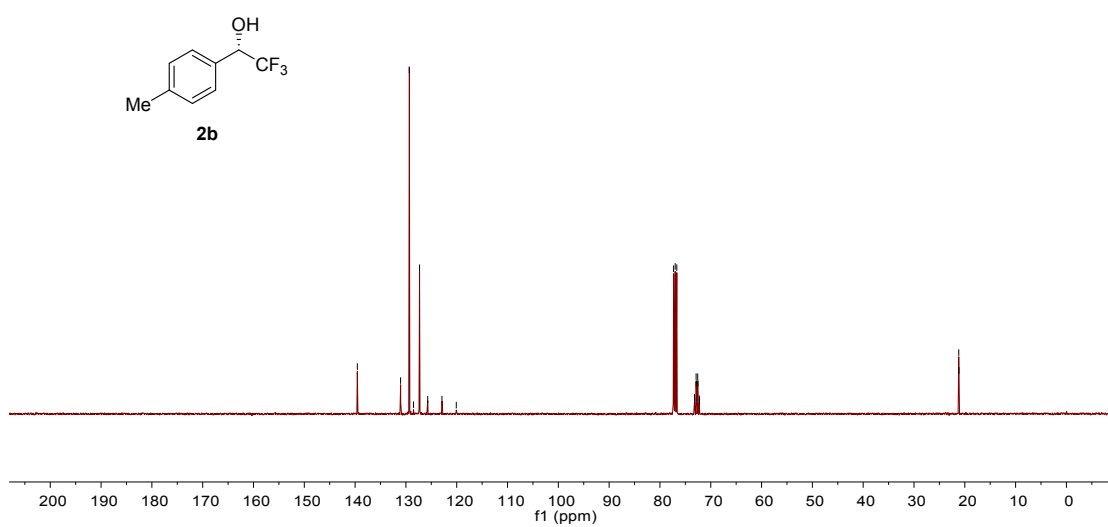

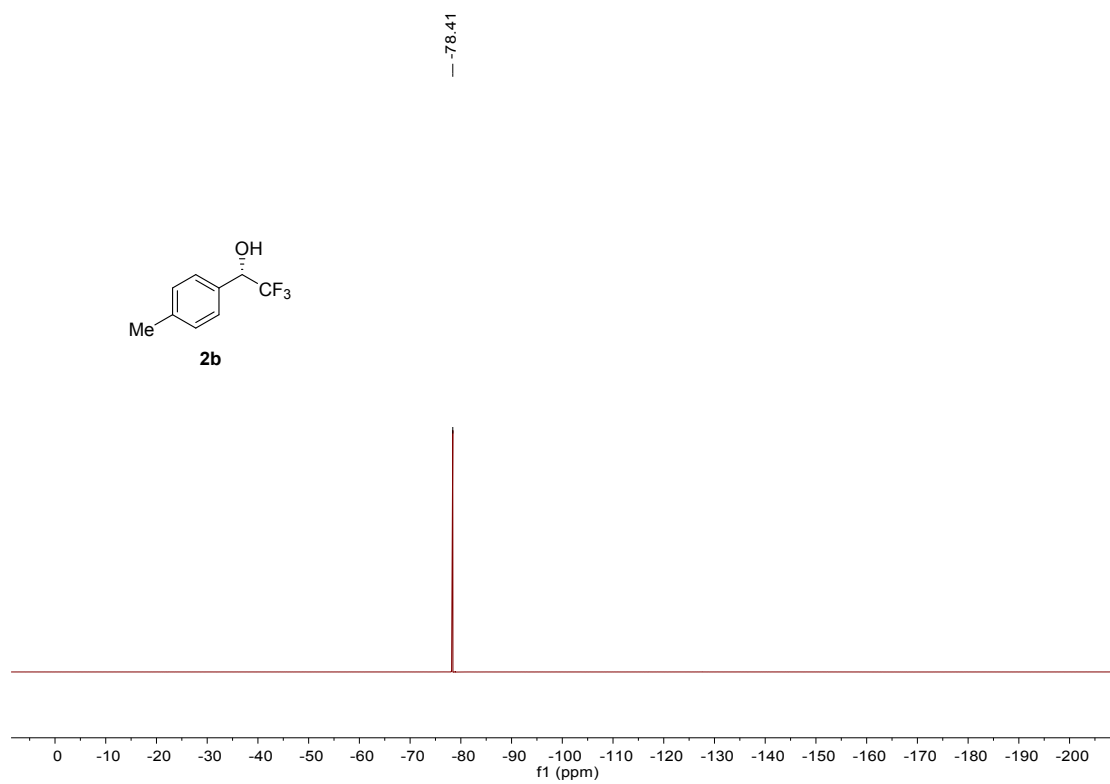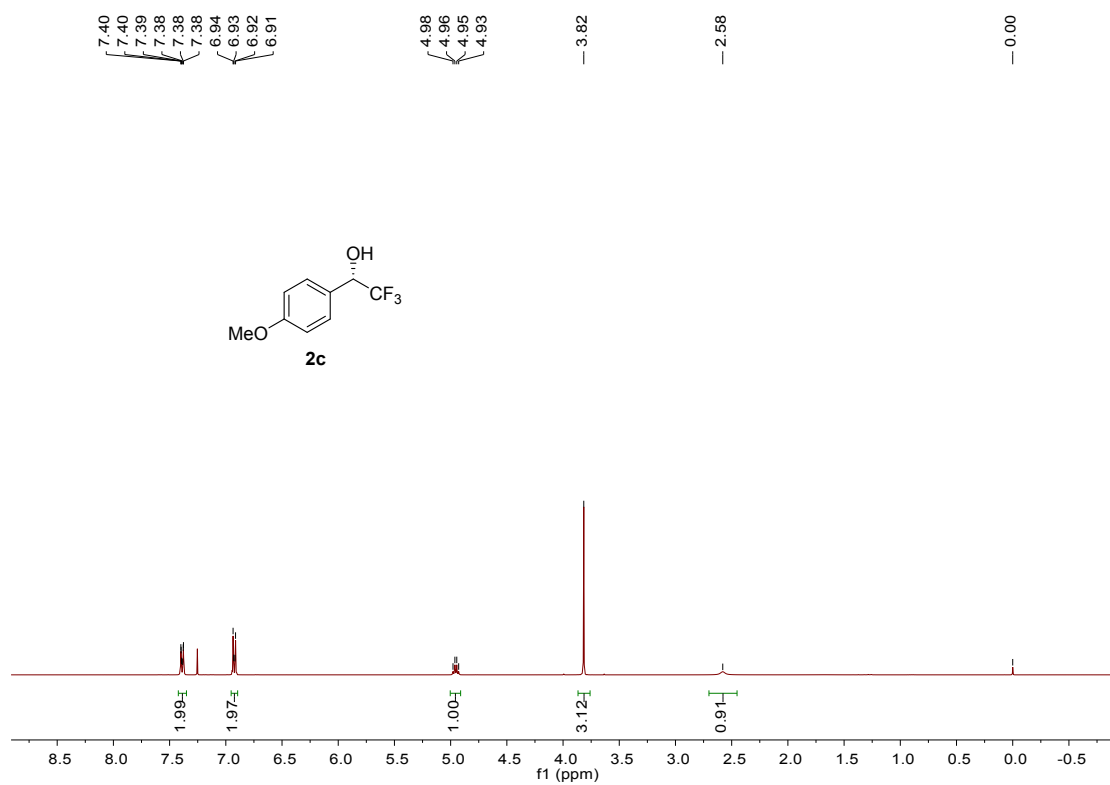

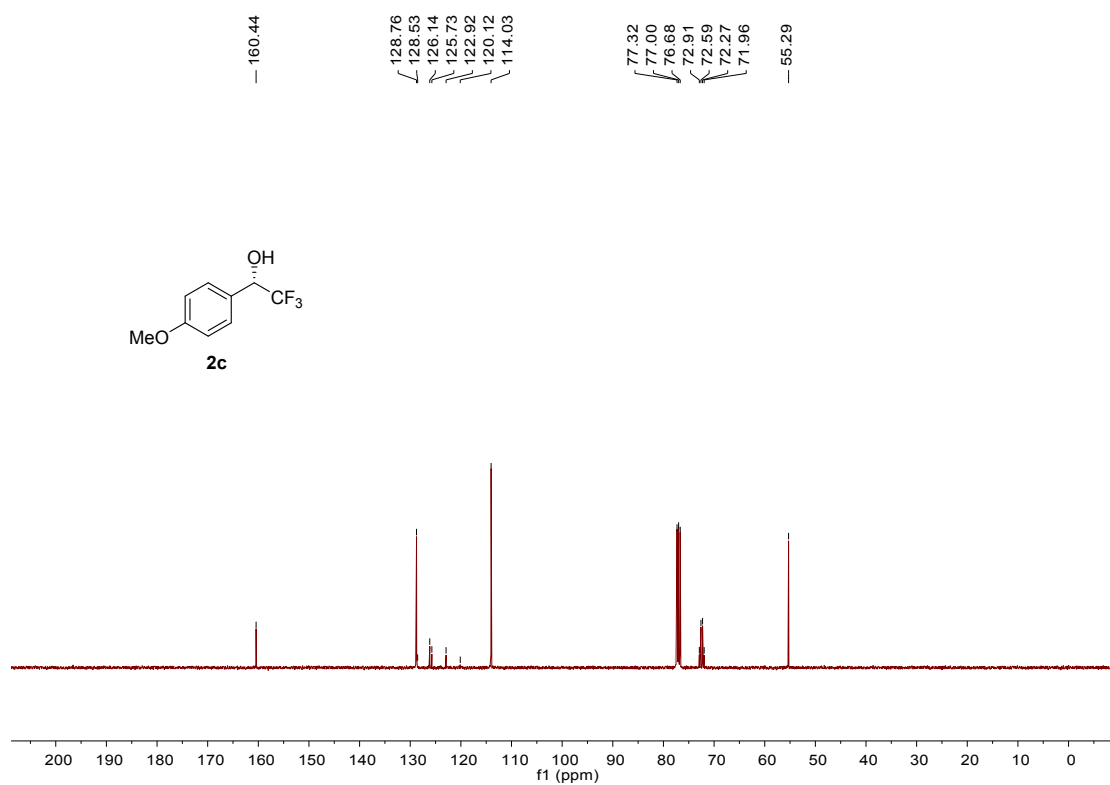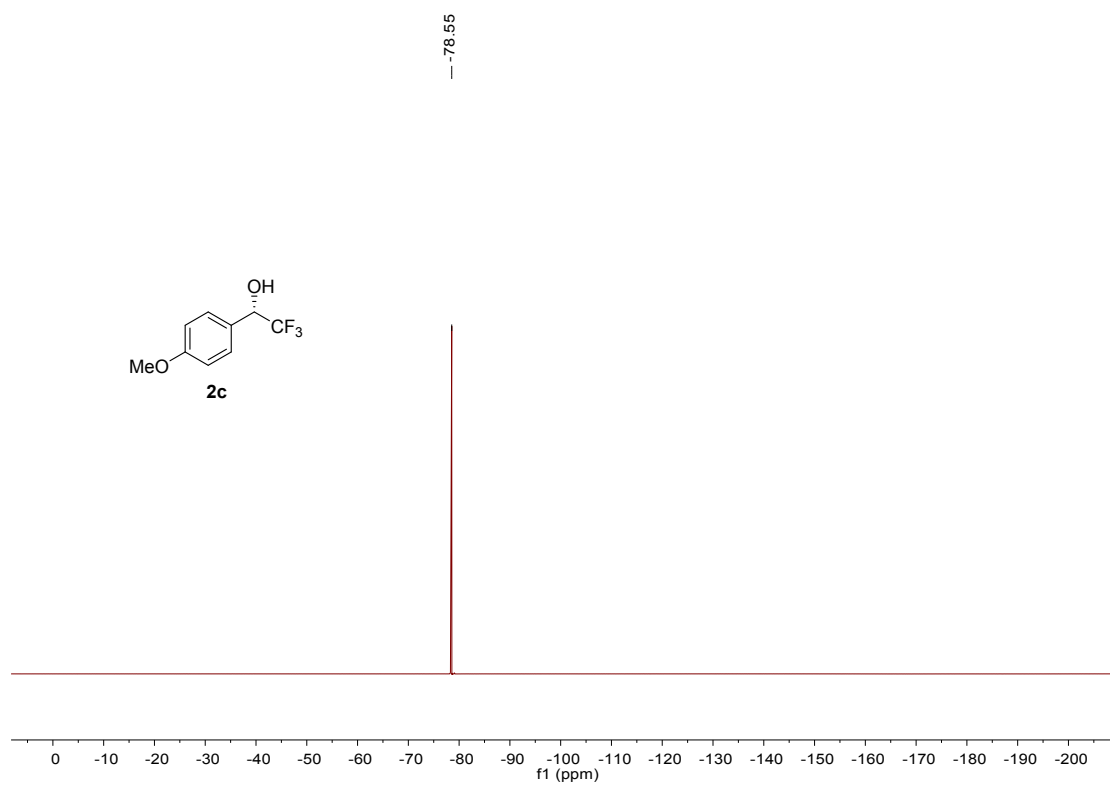



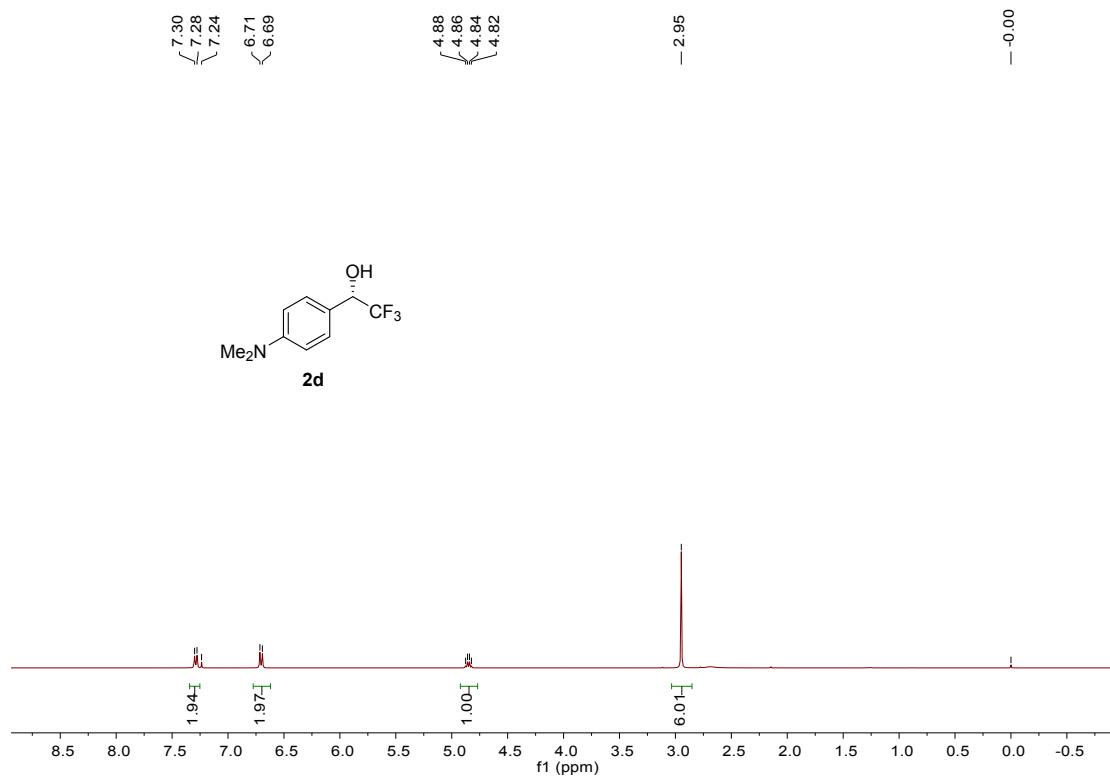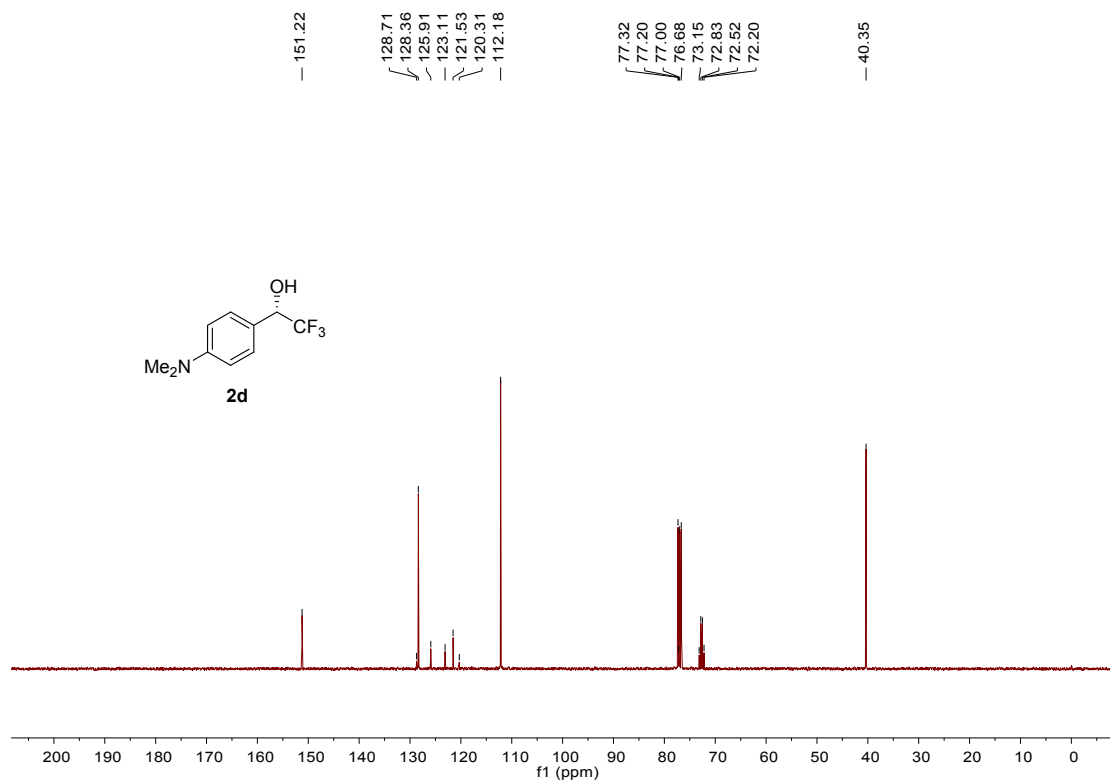

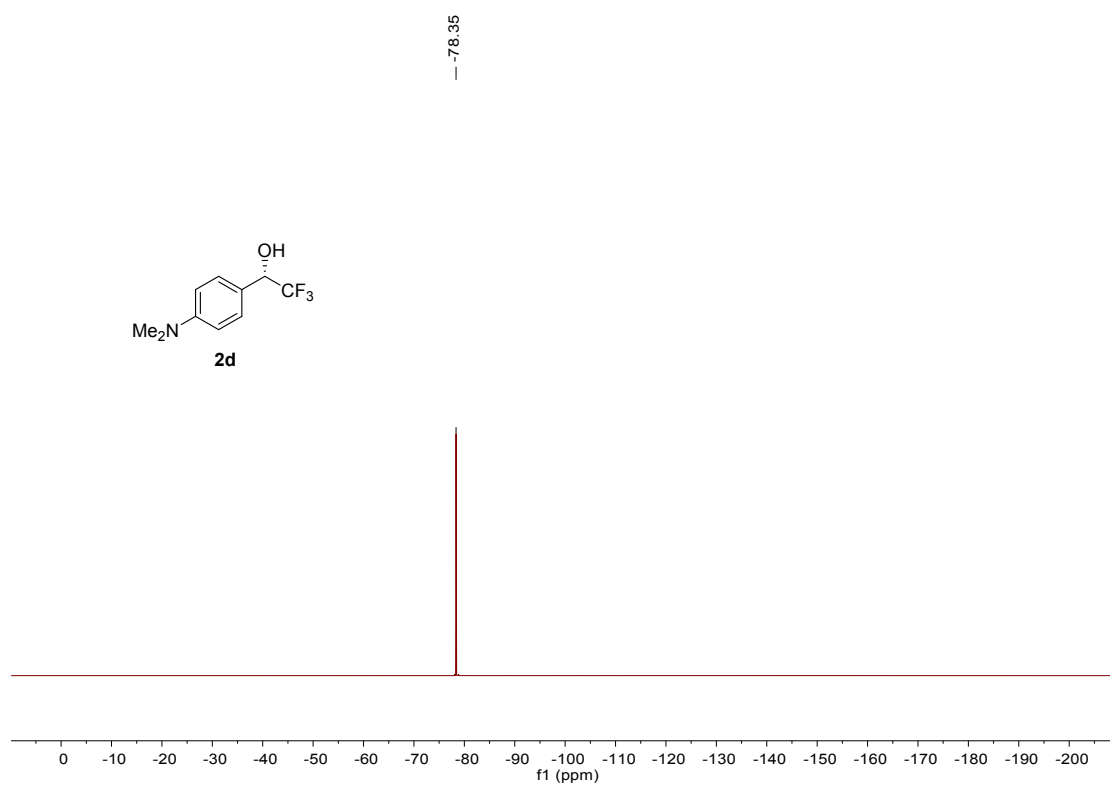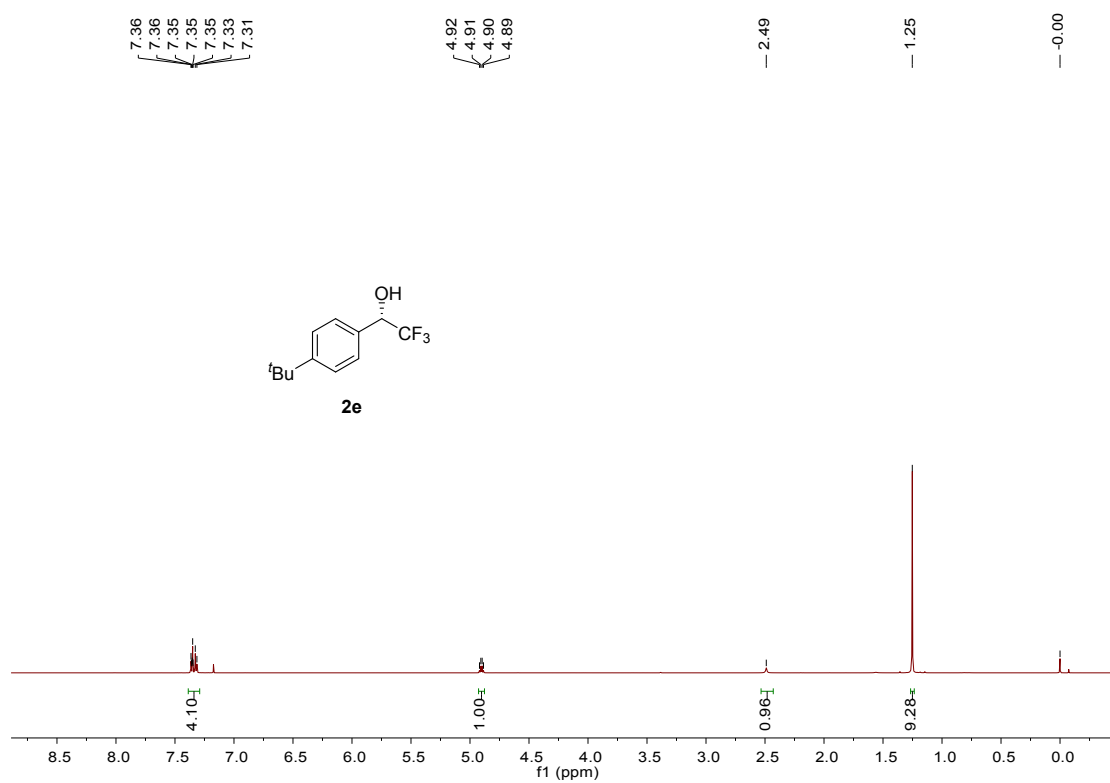

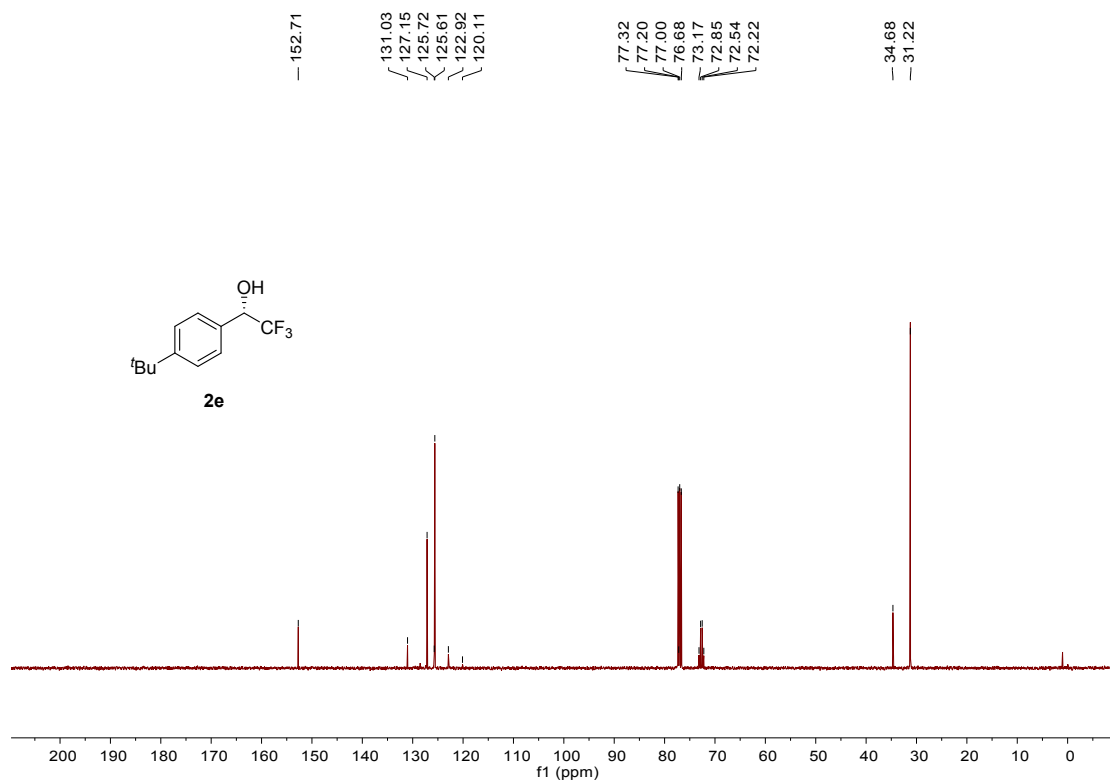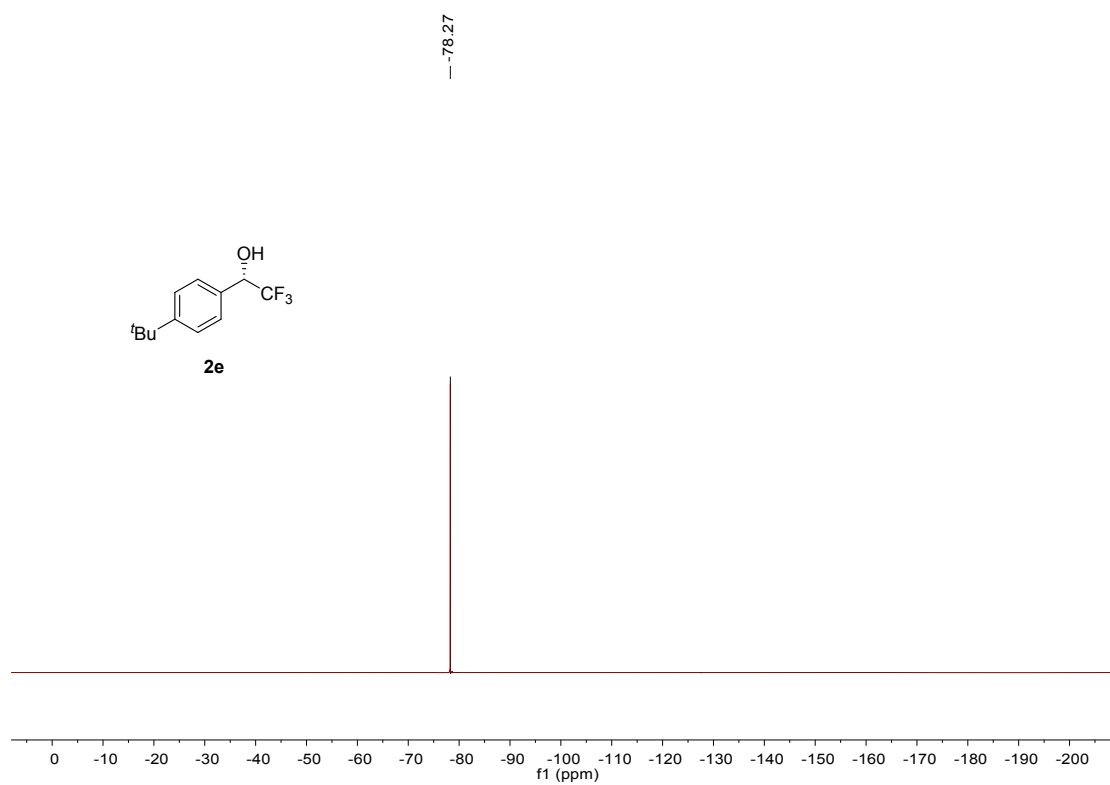

7.48  
7.46  
7.46  
7.44  
7.13  
7.12  
7.11  
7.11  
7.10  
7.09  
7.08  
7.08

5.04  
5.02  
5.00  
4.99

-2.81

-0.00

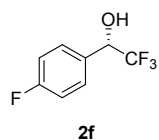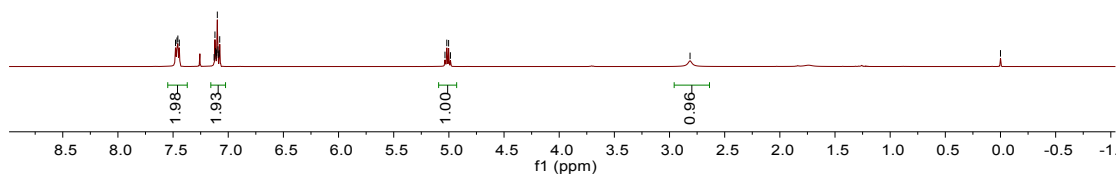

164.21  
162.57

129.79  
129.37  
129.31  
126.94  
125.07  
123.20  
121.33  
115.72  
115.58

72.46  
72.25  
72.03  
71.82

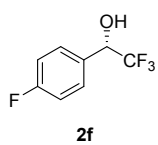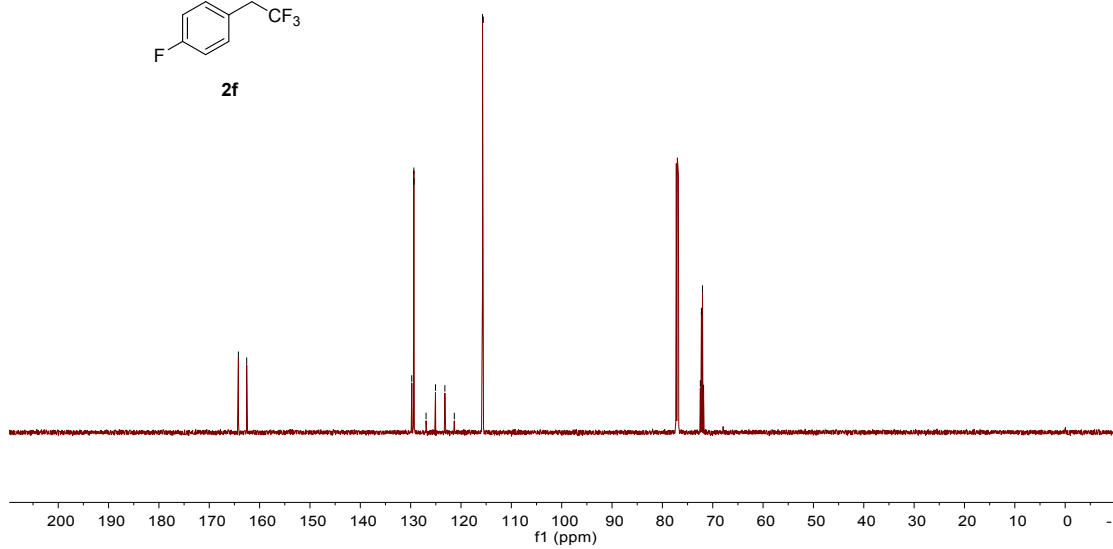

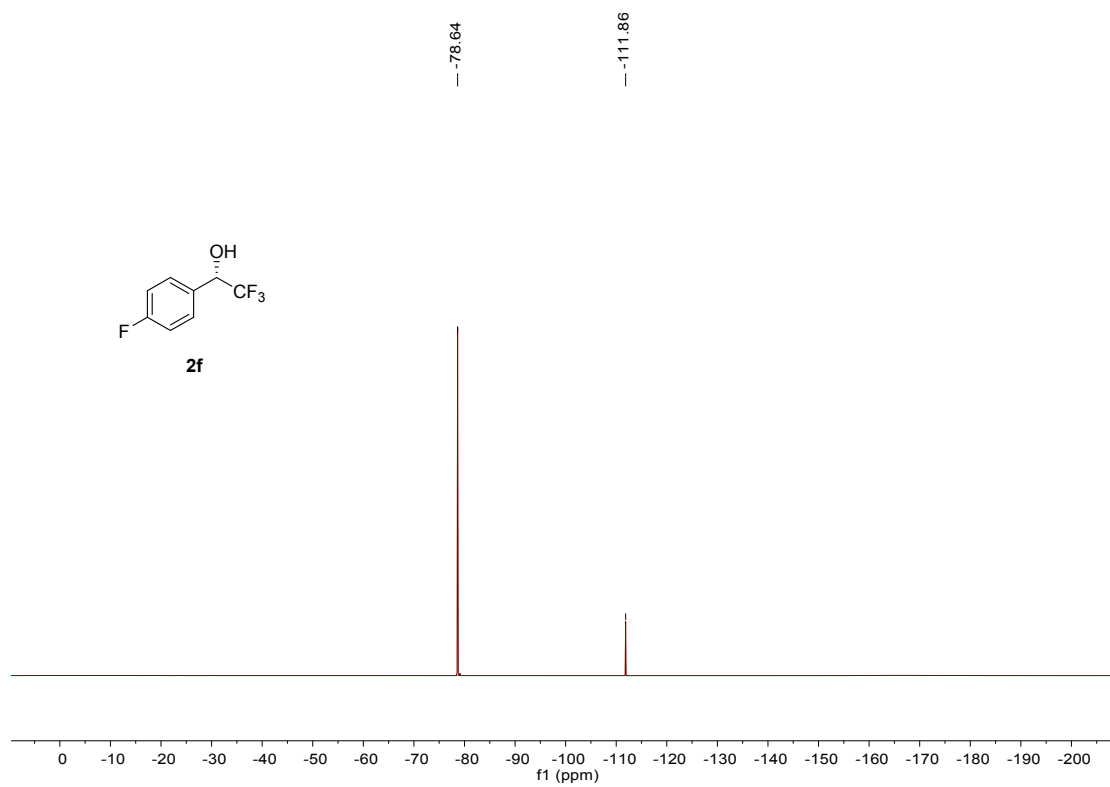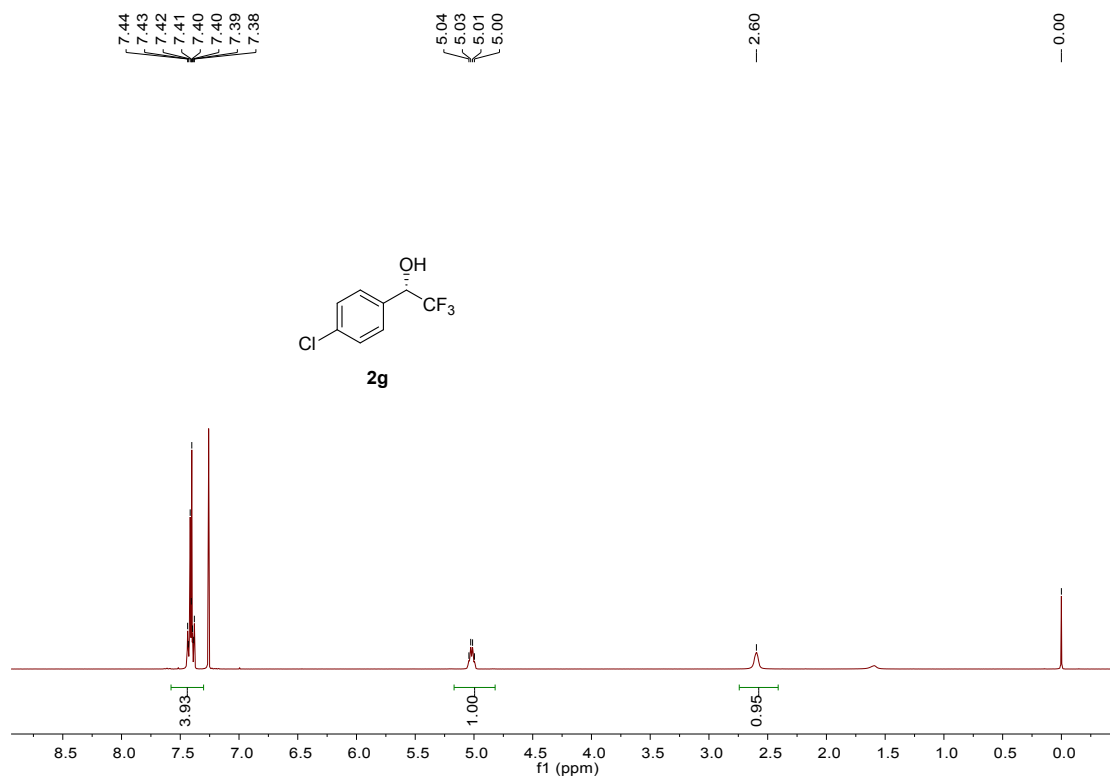

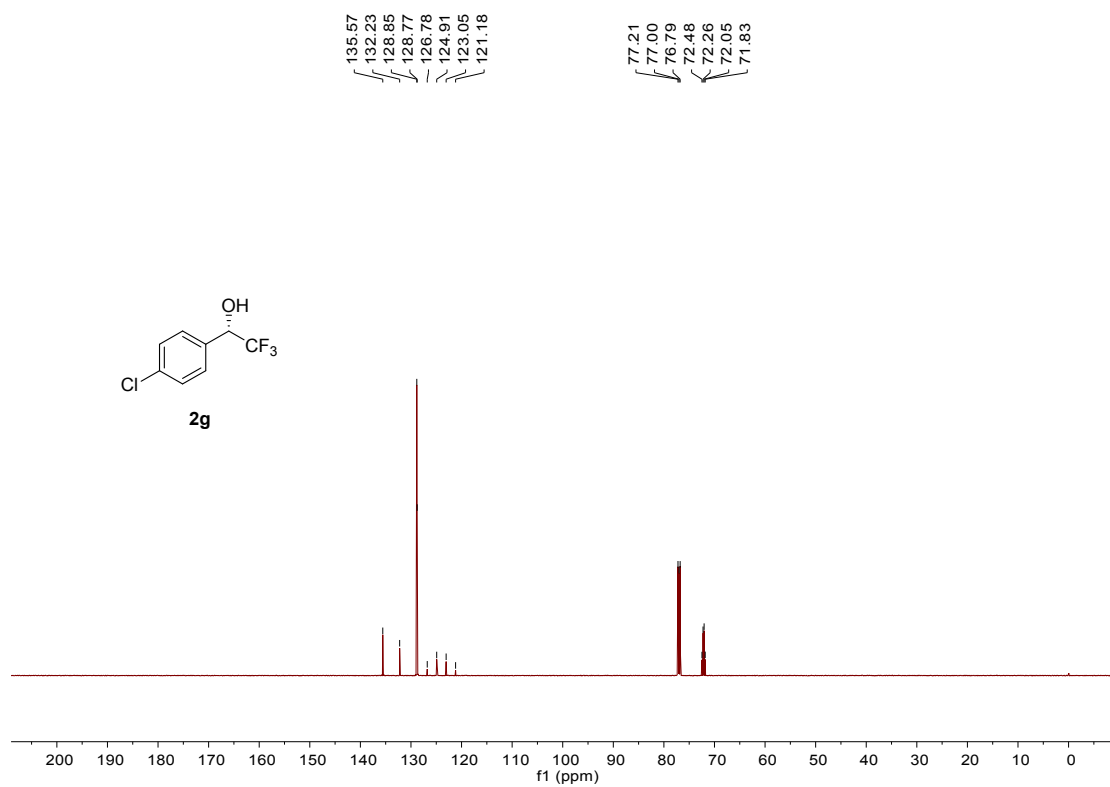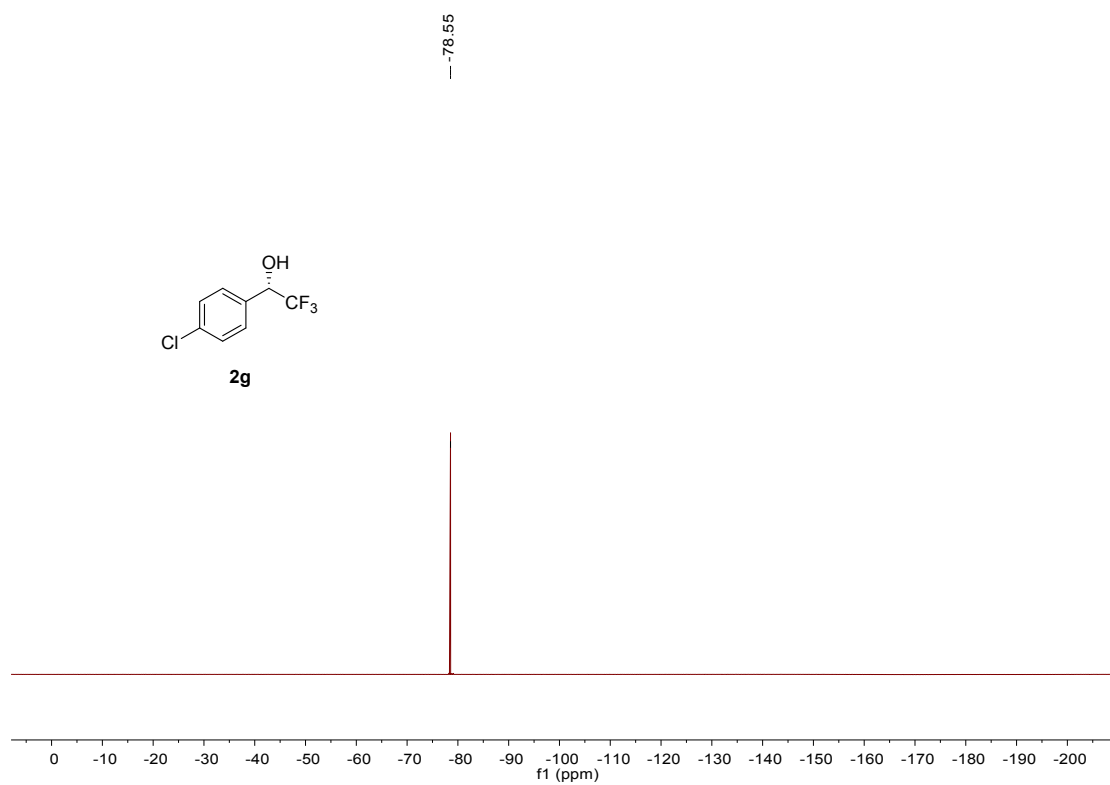

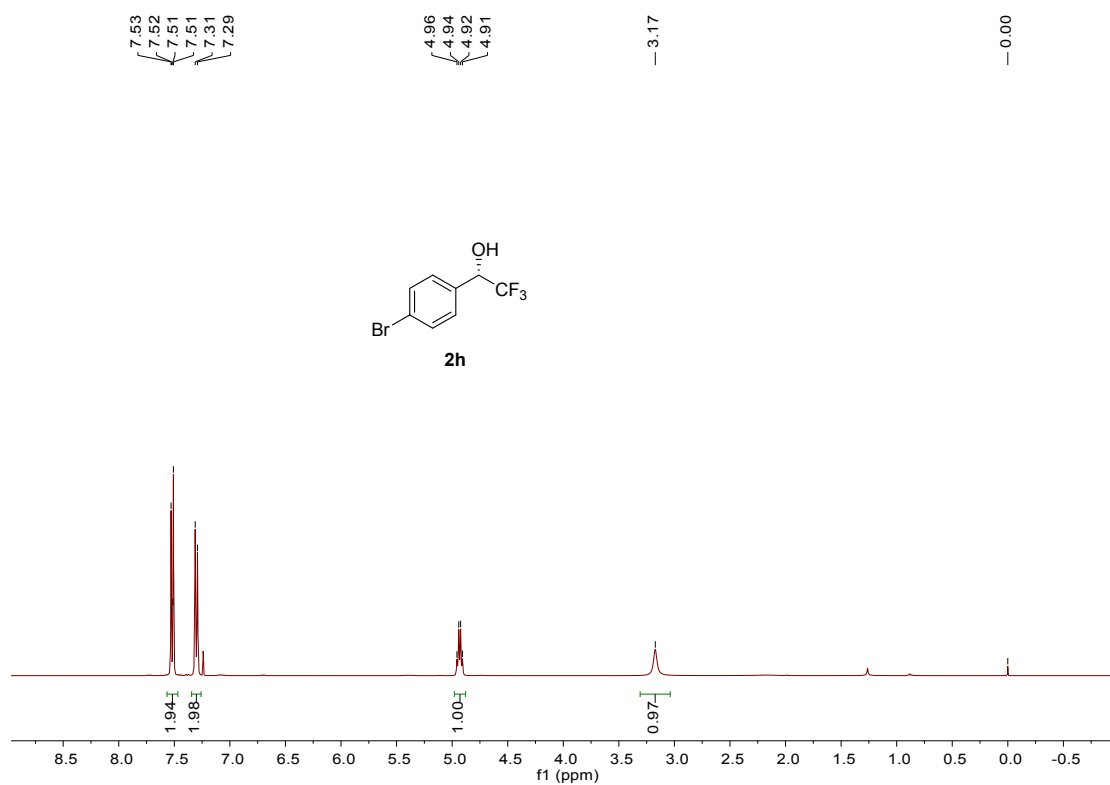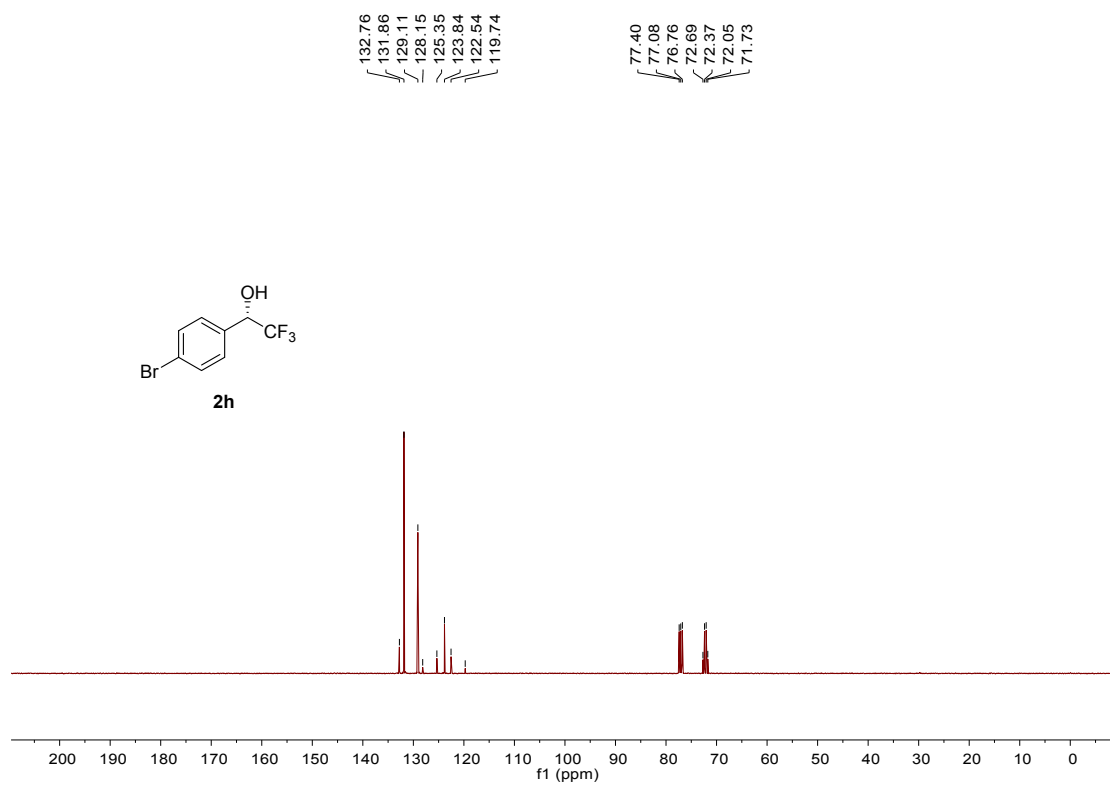

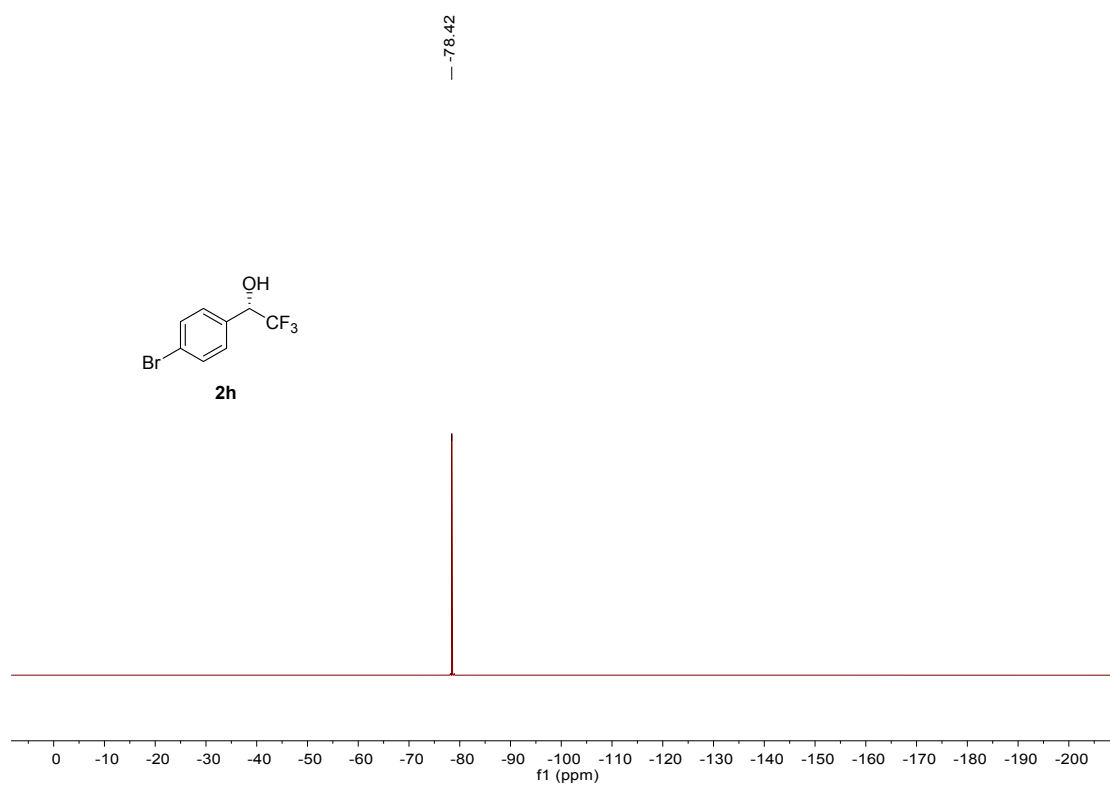

7.31  
7.29  
7.27  
7.26  
7.25  
7.24  
7.23  
7.22  
7.22  
7.21  
7.21  
7.20  
7.20  
7.20

4.97  
4.95  
4.94  
4.92  
4.92

-2.68  
-2.37

0.00

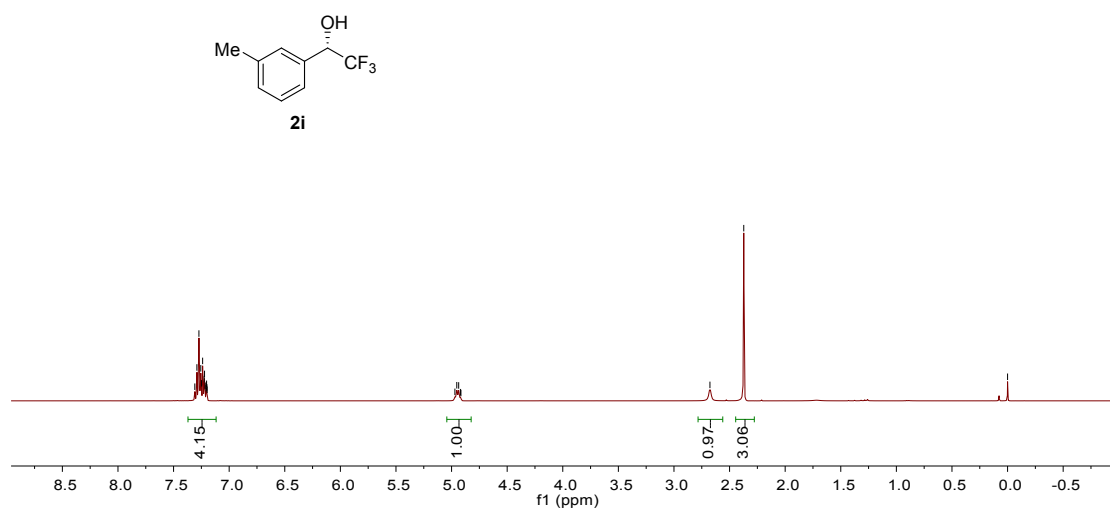



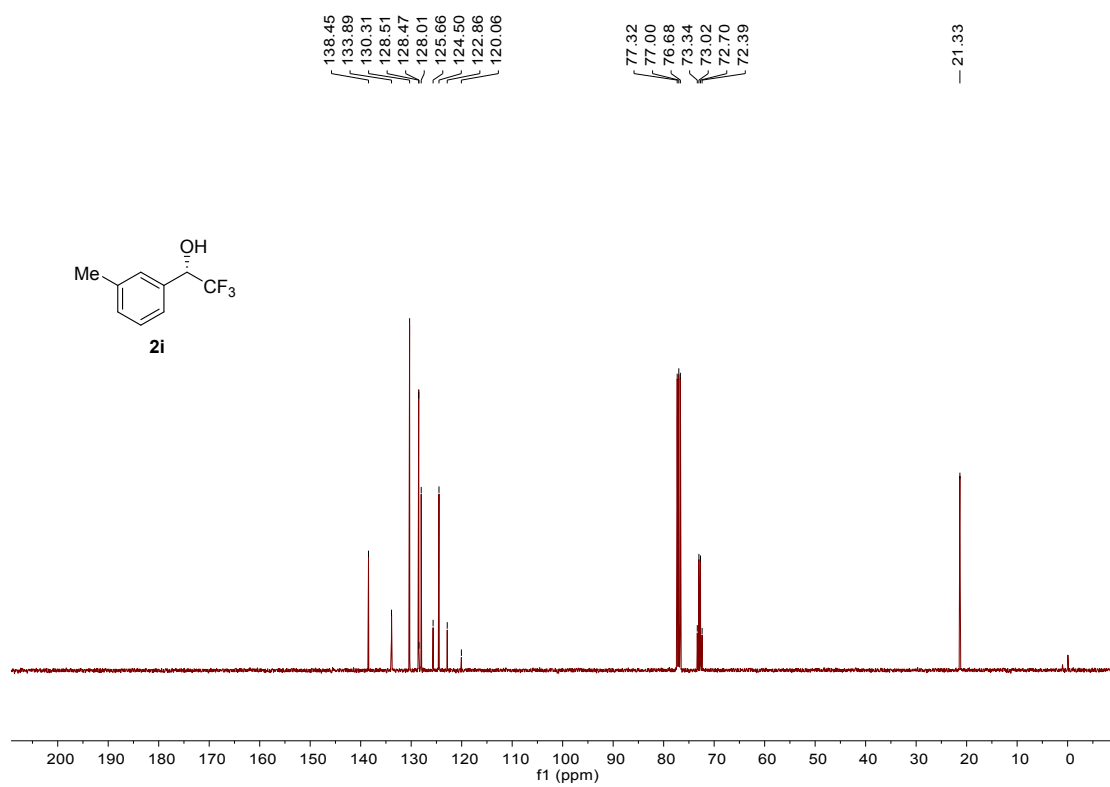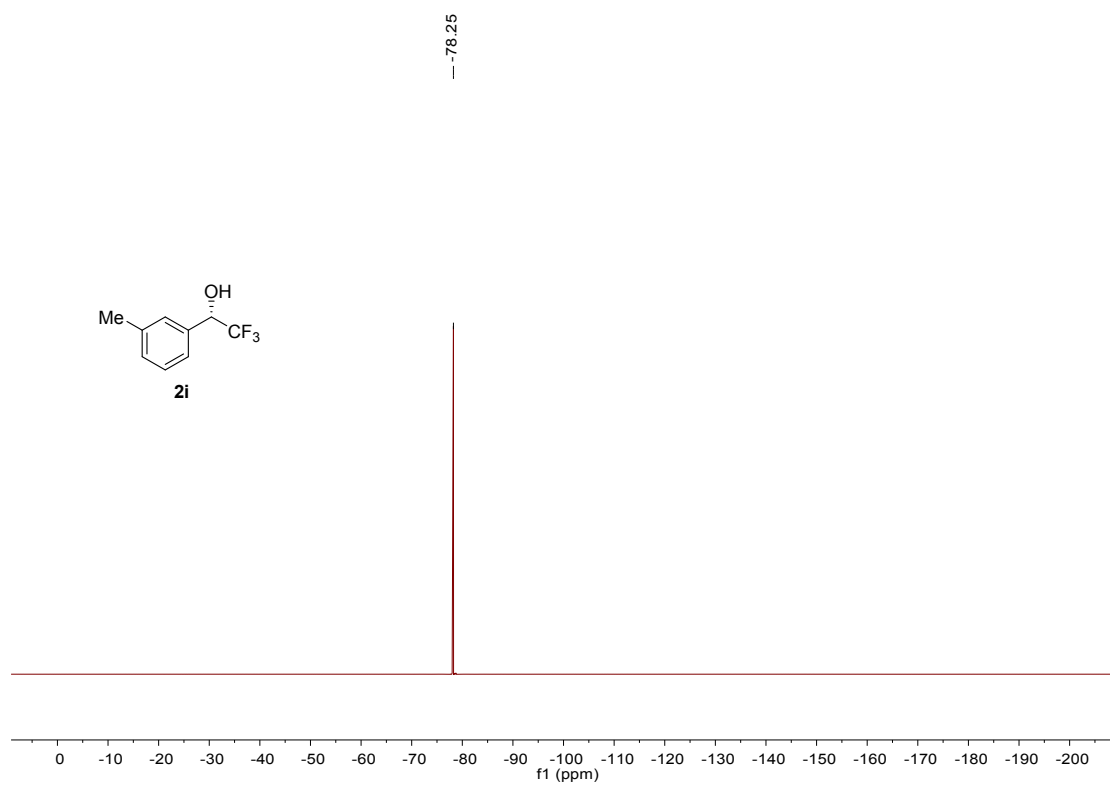

7.40  
7.40  
7.39  
7.38  
7.37  
7.36  
7.35  
7.25  
7.25  
7.24  
7.23  
7.21  
7.21  
7.20  
7.13  
7.13  
7.12  
7.12  
7.11  
7.11  
7.10  
7.09  
7.09  
7.08  
7.08  
5.05  
5.04  
5.04  
5.03  
5.02  
5.01  
5.00  
4.99

2.79  
2.78

0.00

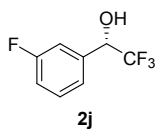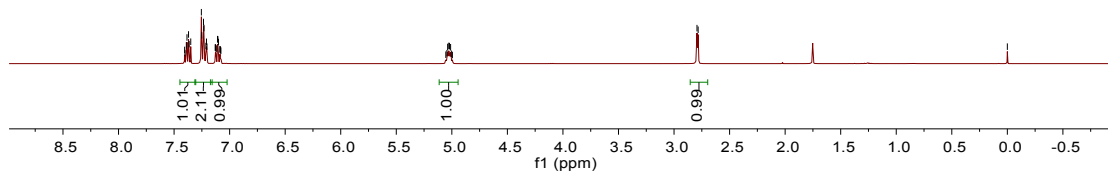

163.58  
161.95

136.21  
136.16  
130.20  
130.15  
126.78  
124.91  
123.14  
123.12  
123.04  
121.17  
116.59  
116.45  
114.62  
114.46

77.21  
77.00  
76.79  
72.47  
72.26  
72.04  
71.83

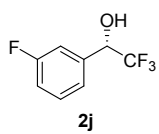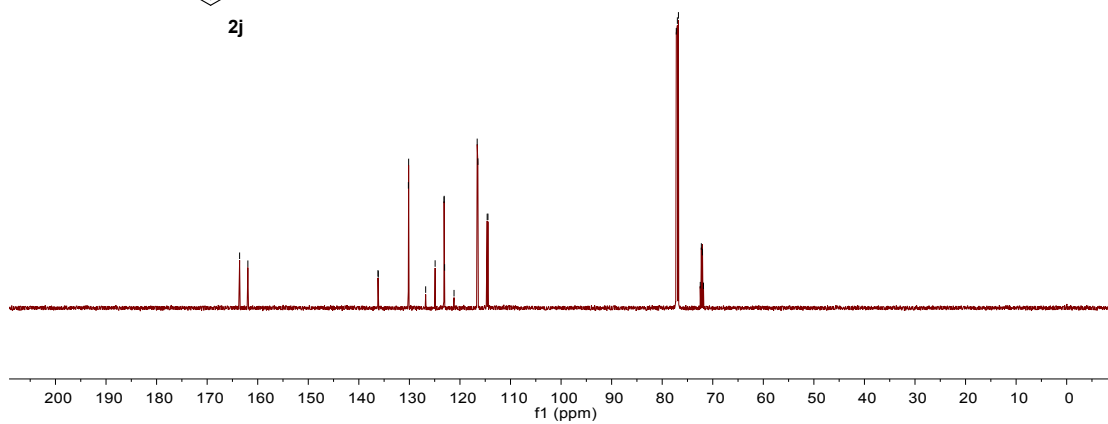

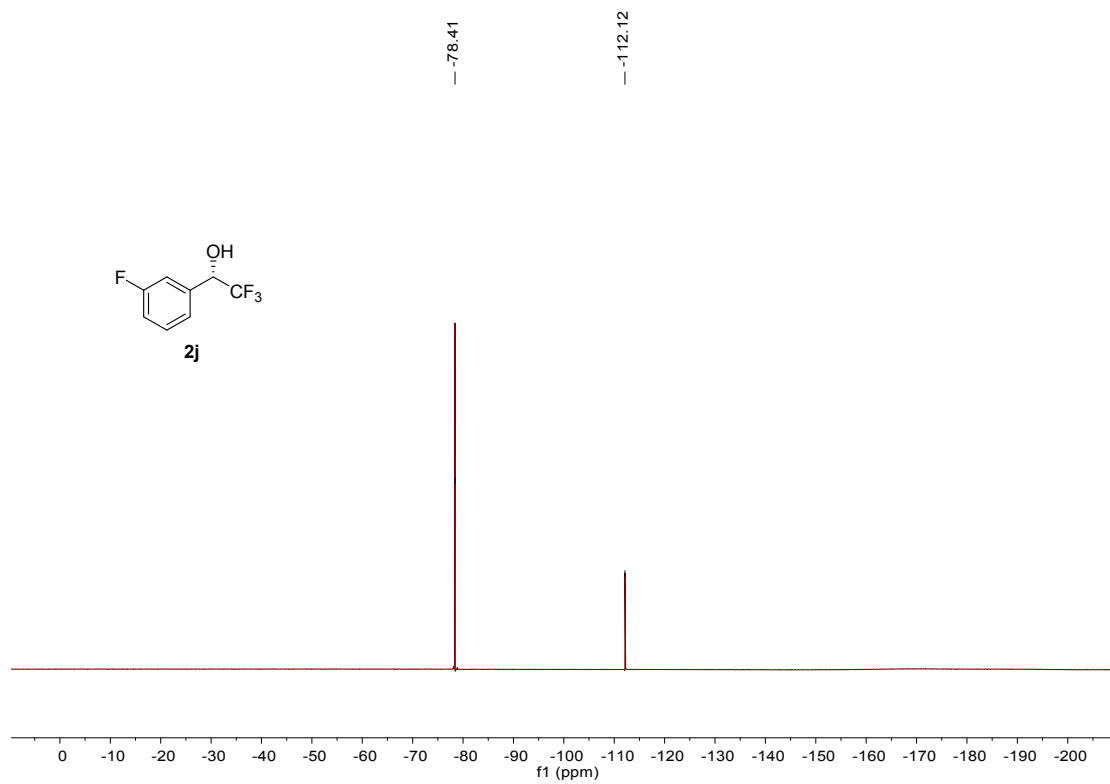

7.49  
7.40  
7.40  
7.39  
7.39  
7.38  
7.38  
7.37  
7.35  
7.34

5.03  
5.01  
5.00  
4.98

-2.75

0.00

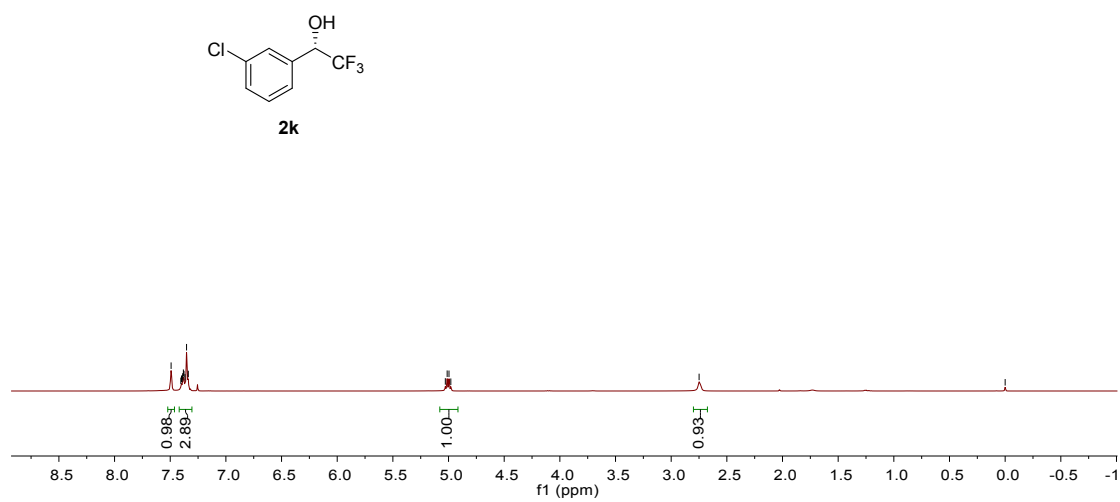

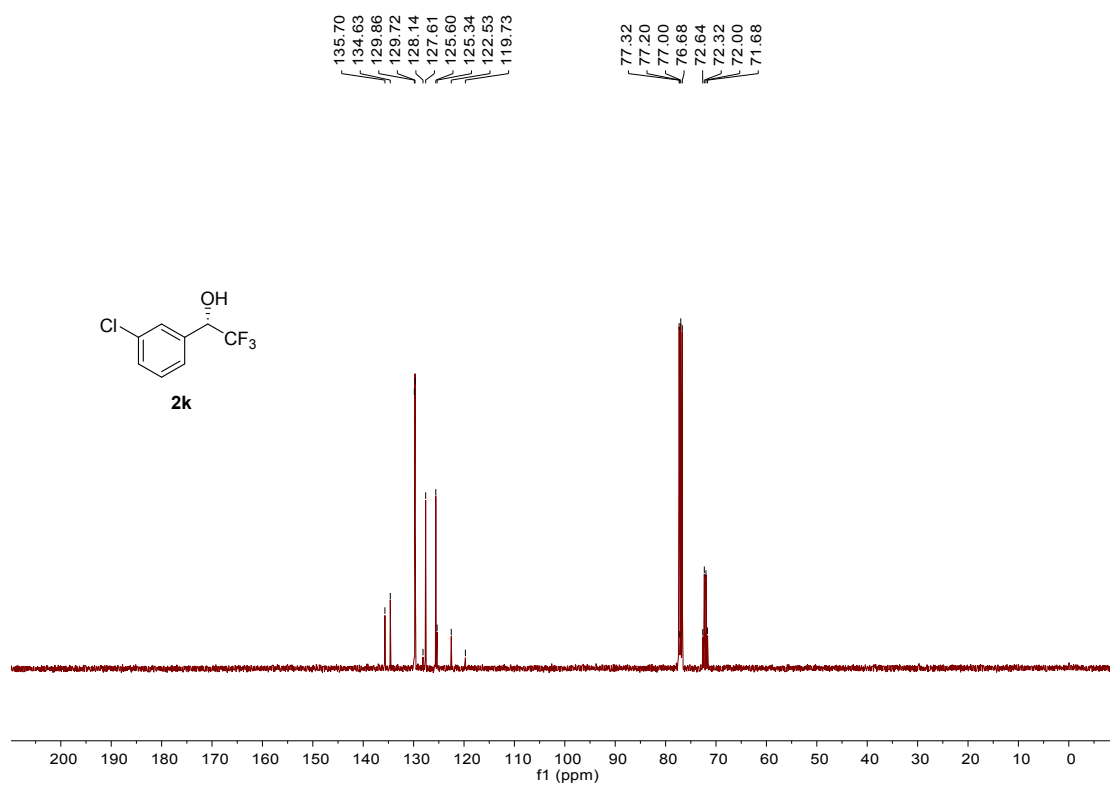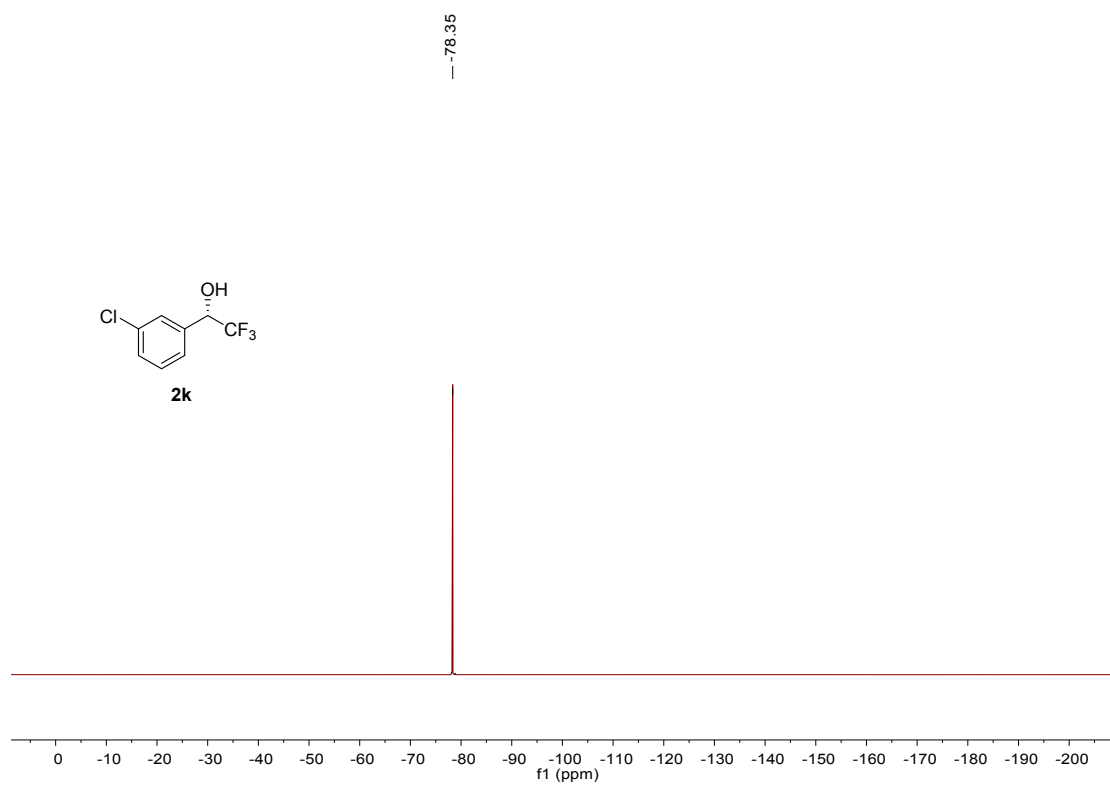

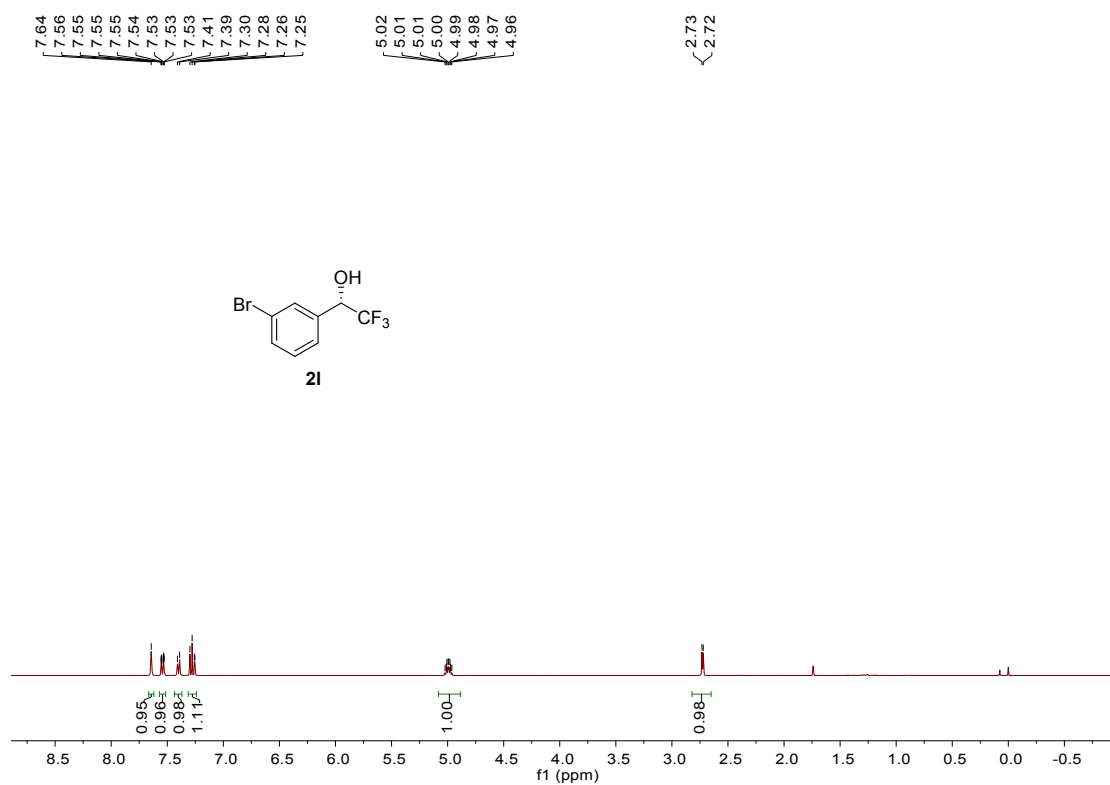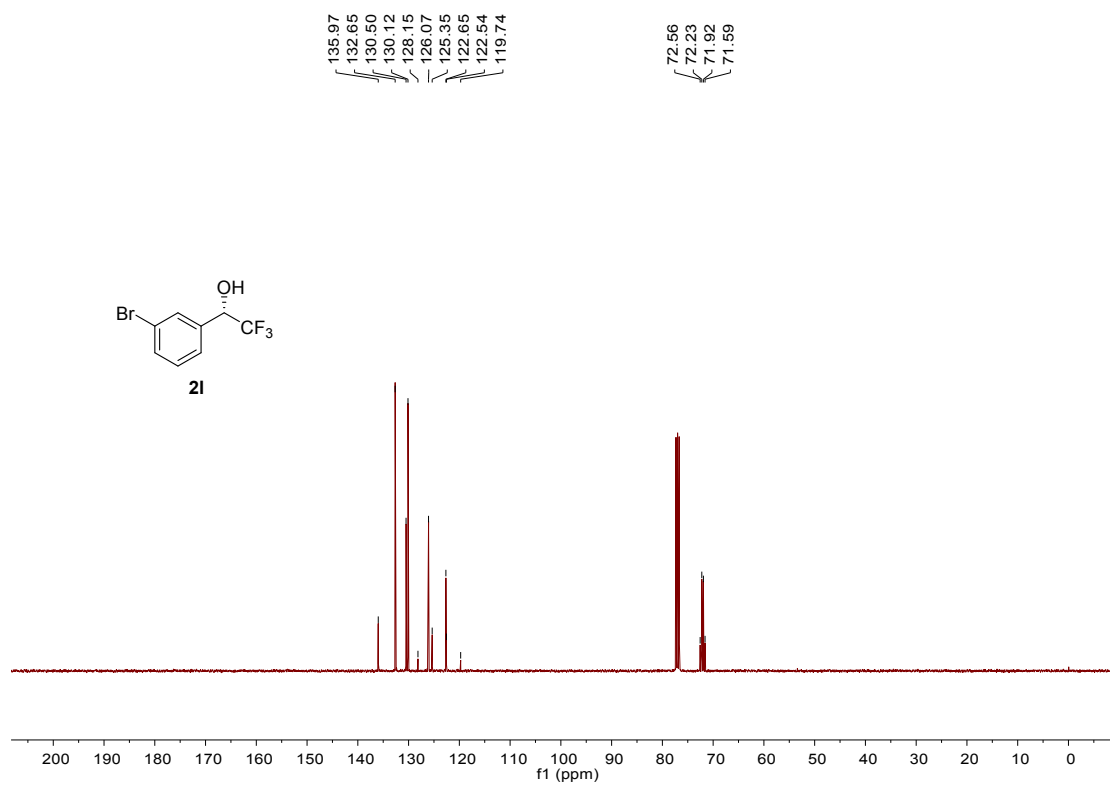

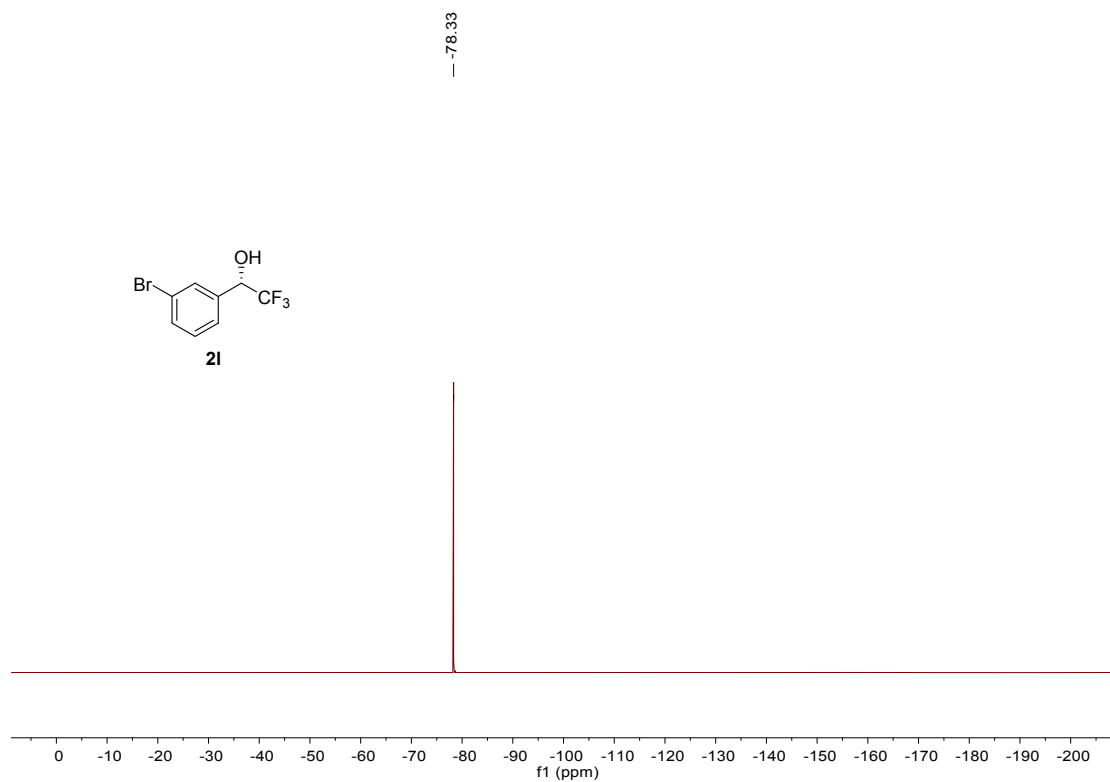

7.98  
7.93  
7.91  
7.90  
7.89  
7.61  
7.59  
7.58  
7.57  
7.56  
7.55  
7.54

5.24  
5.23  
5.22  
5.21  
5.20  
5.19  
5.18

2.79  
2.78

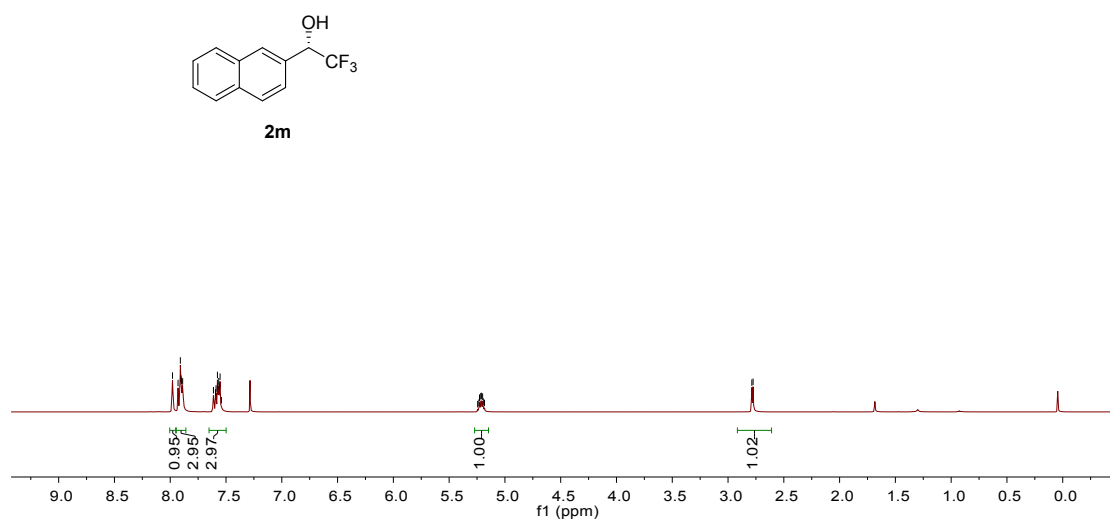

133.72  
132.86  
131.24  
128.50  
128.21  
127.72  
127.32  
127.12  
126.86  
126.55  
125.25  
124.26  
123.38  
121.51

77.21  
77.00  
76.79  
73.28  
73.06  
72.85  
72.64

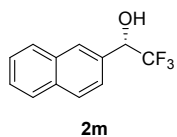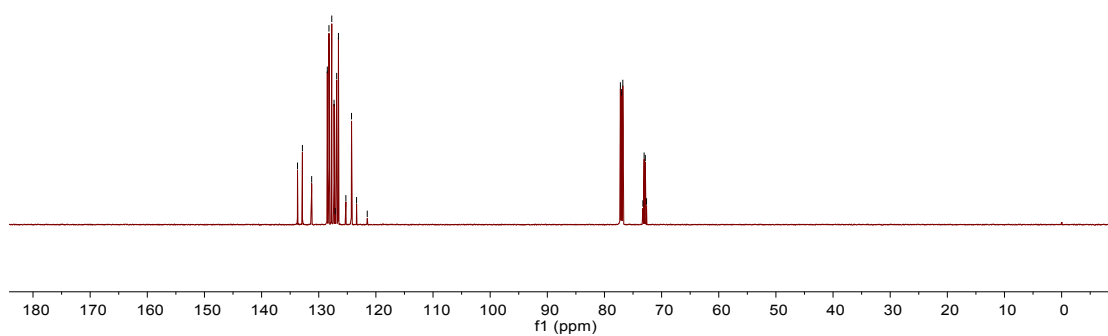

— 78.00

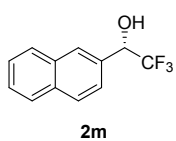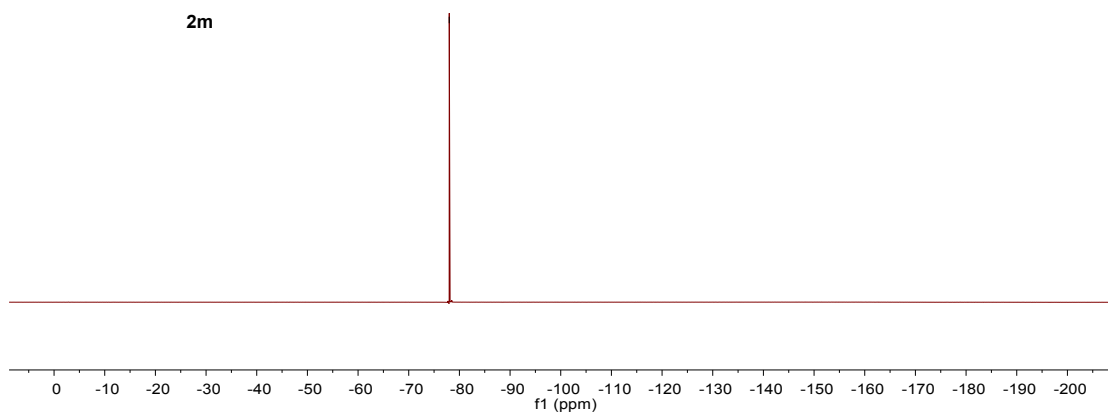

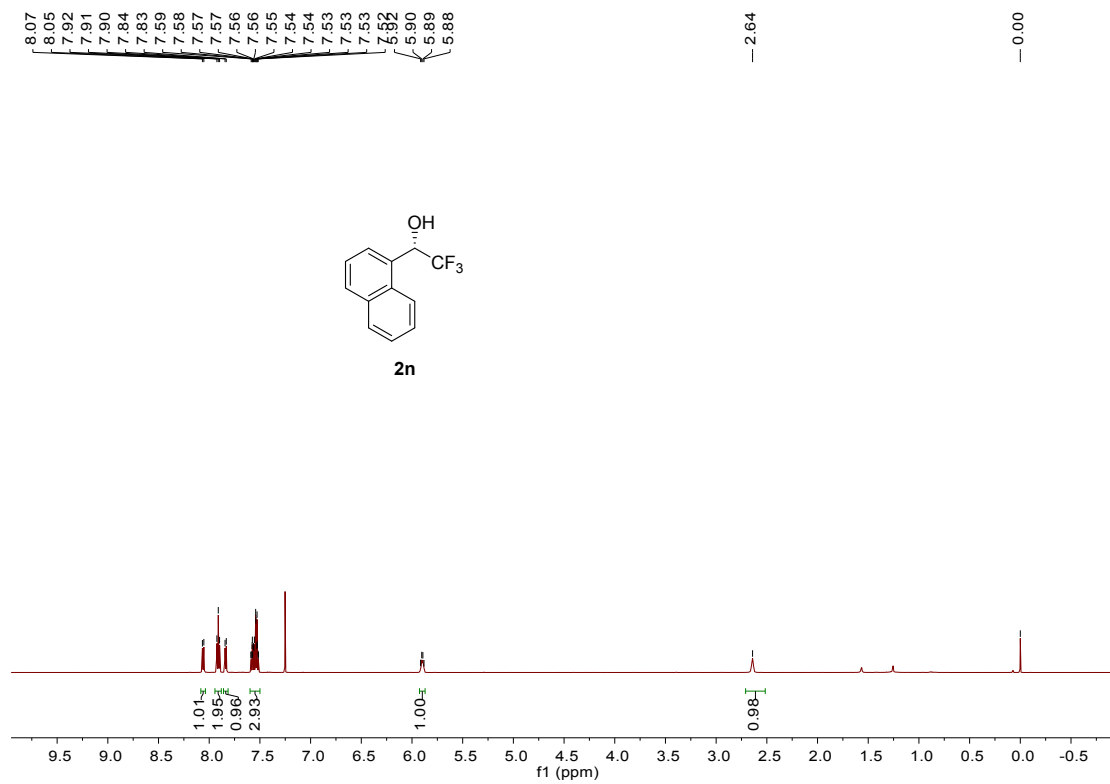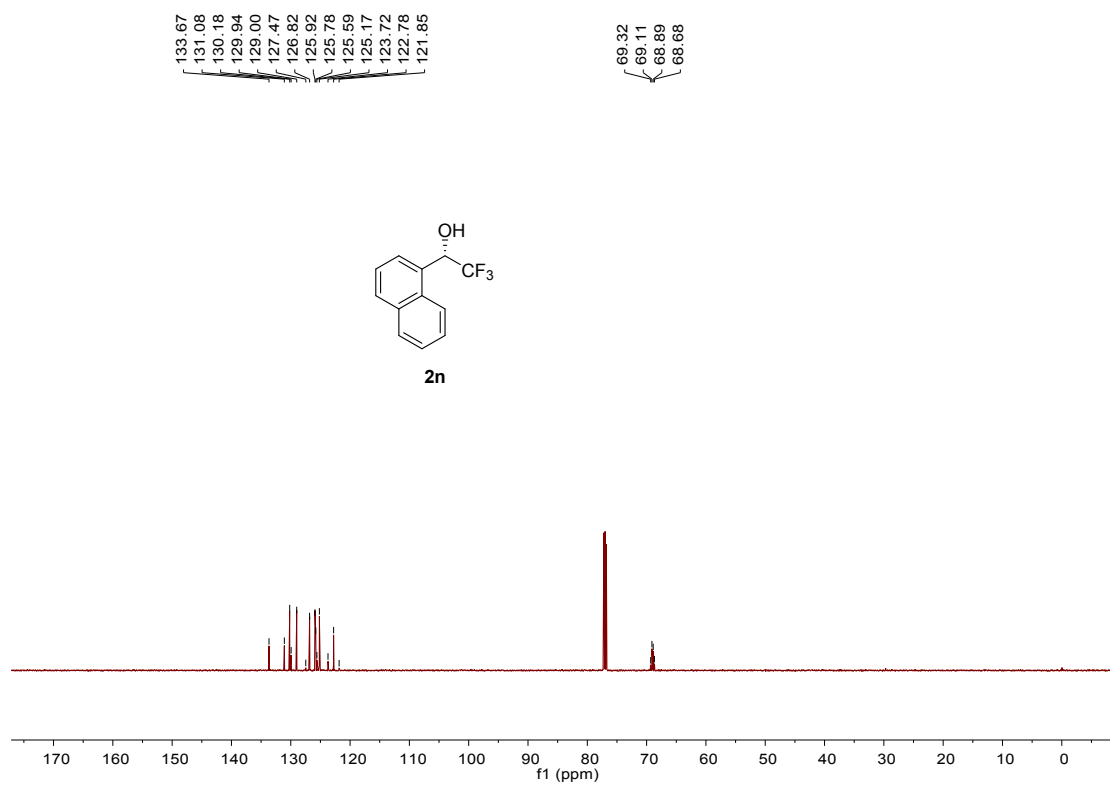



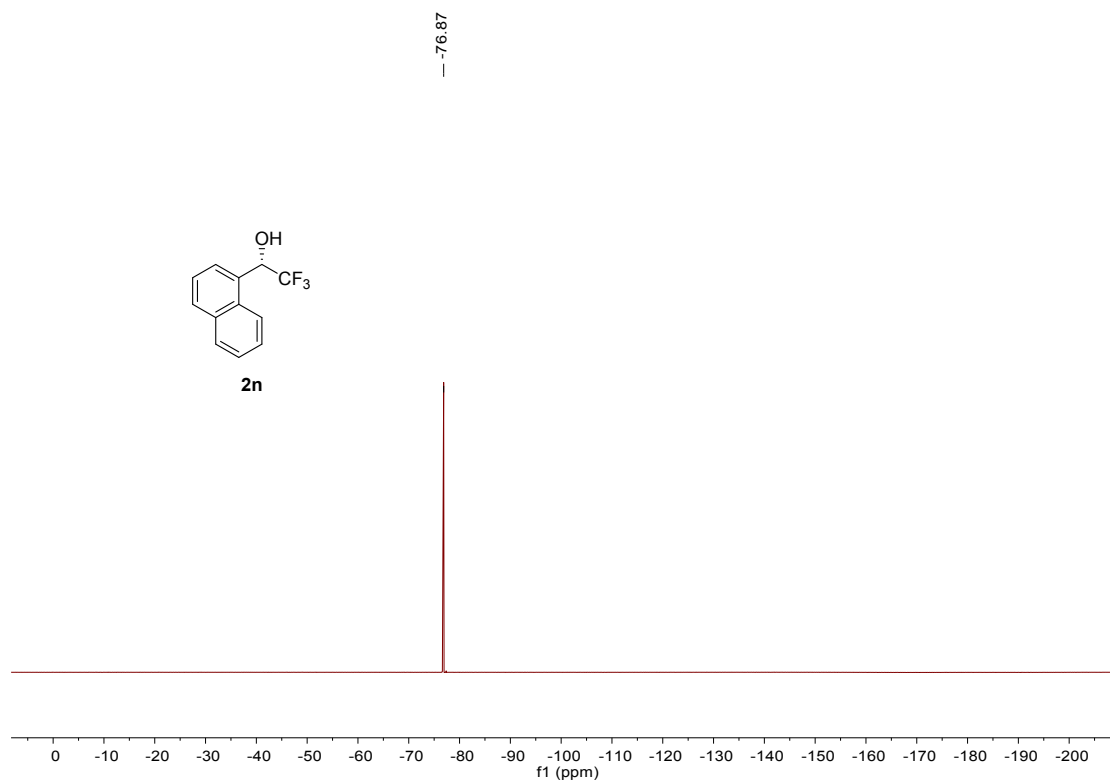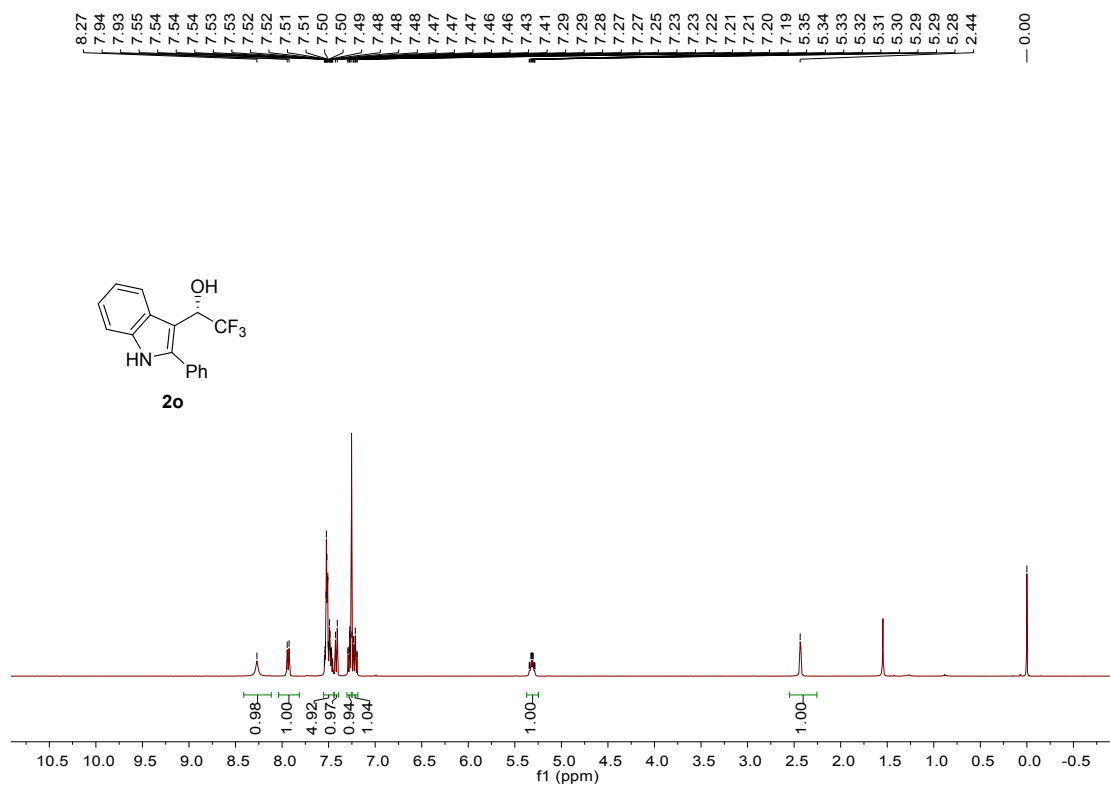

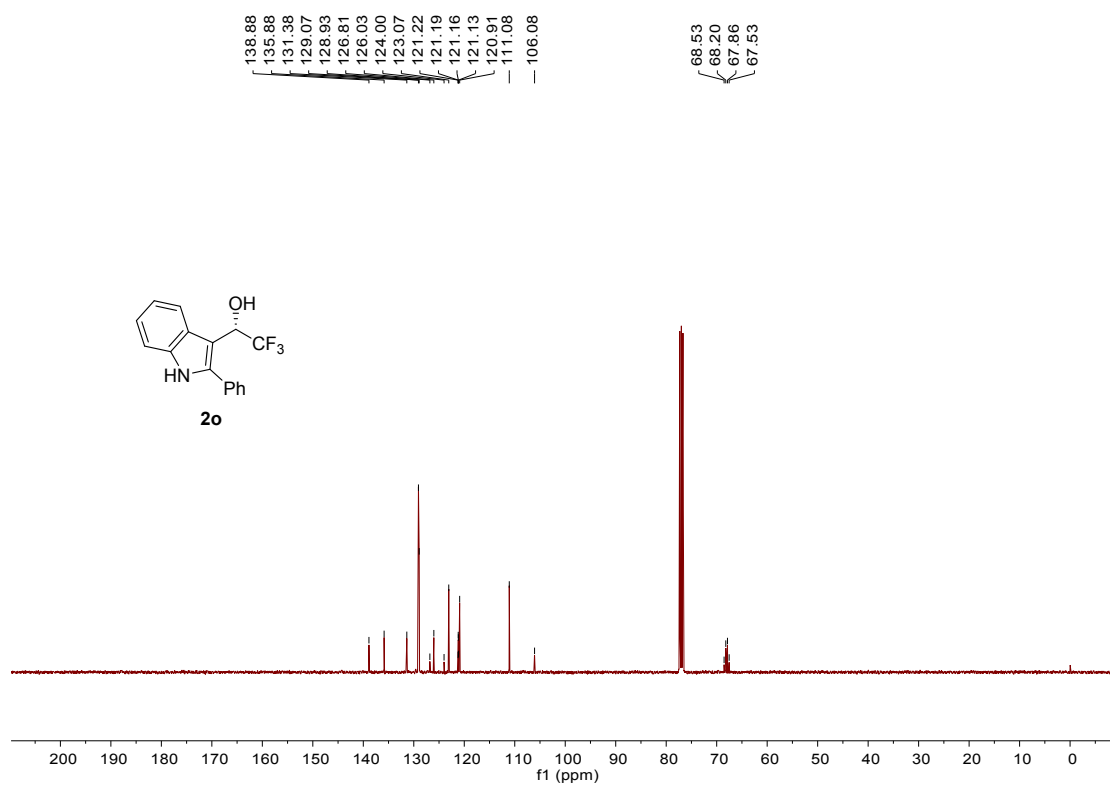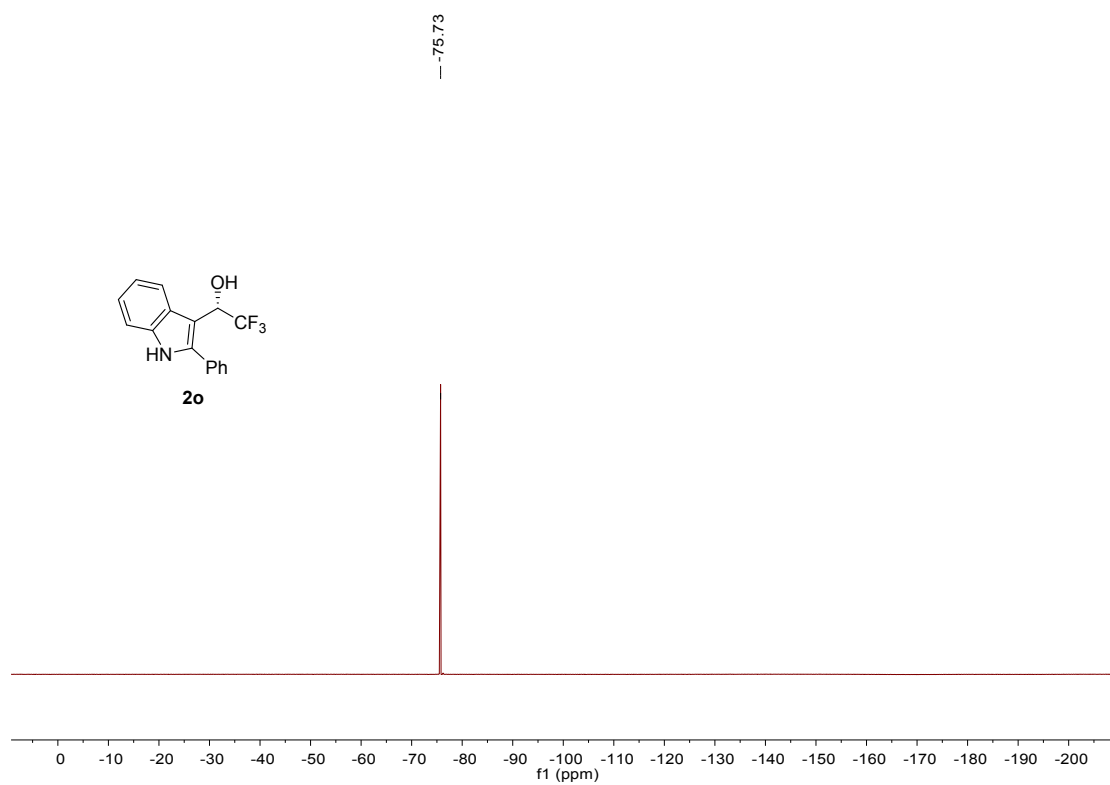

7.40  
7.40  
7.39  
7.39  
7.21  
7.21  
7.20  
7.20  
7.06  
7.06  
7.05  
7.05  
7.04  
7.04

5.30  
5.29  
5.28  
5.27  
5.27  
5.25

-2.80

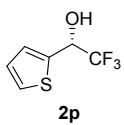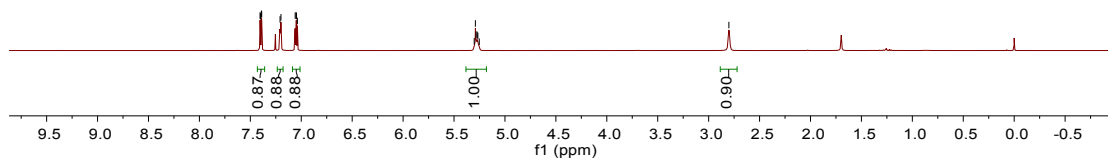

136.09  
127.89  
127.47  
127.08  
127.00  
125.09  
122.29  
119.49

69.83  
69.49  
69.16  
68.82

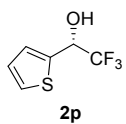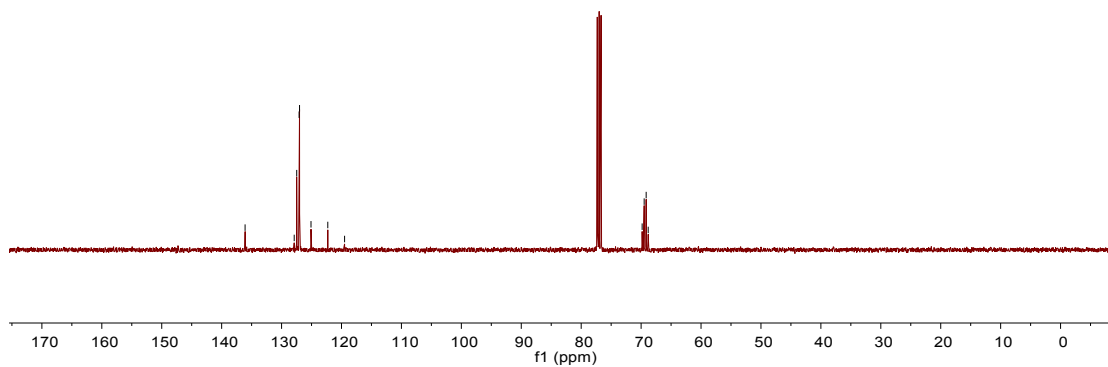

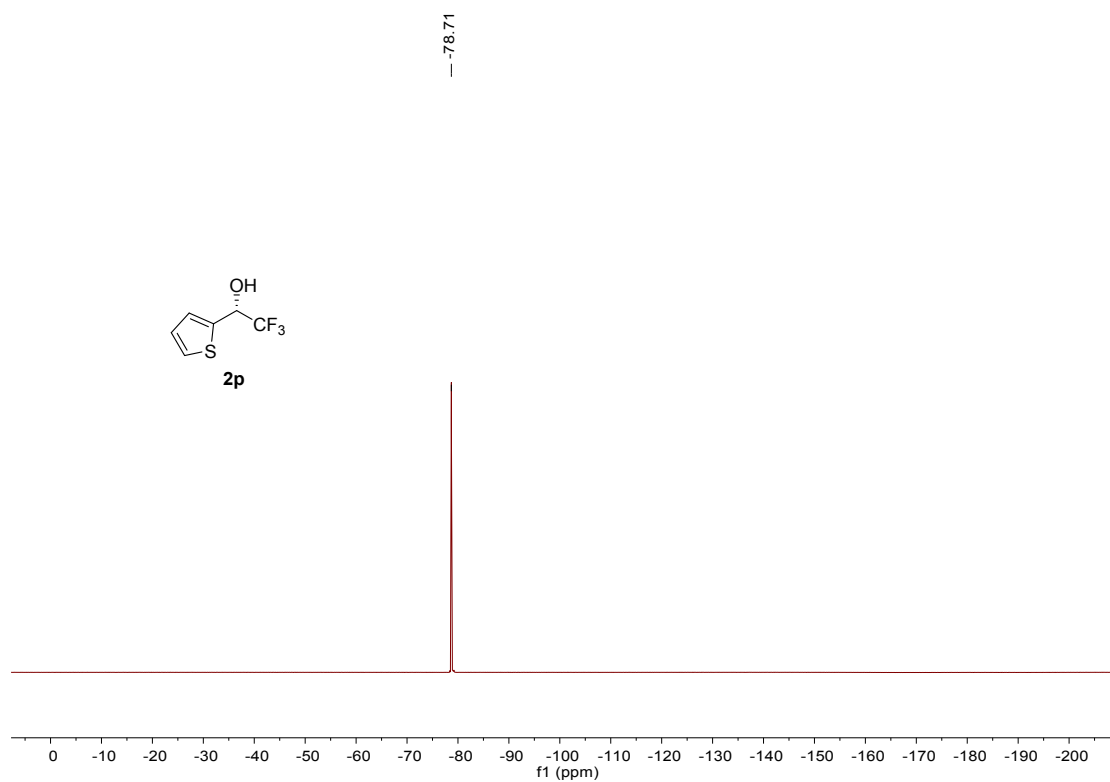

7.38  
7.37  
7.34  
7.33  
7.32  
7.31

5.04  
5.03  
5.02  
5.01  
5.00  
5.00  
4.99  
4.98  
4.97

4.57  
4.57  
4.55  
4.54  
4.49  
4.47  
4.46  
4.45  
4.43  
4.42  
4.37  
4.35  
4.33

2.64

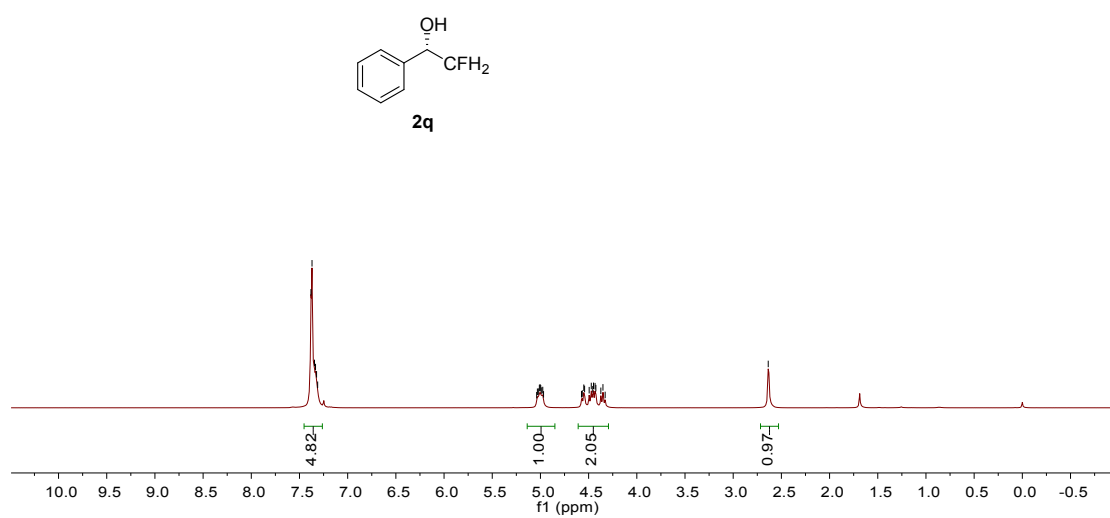

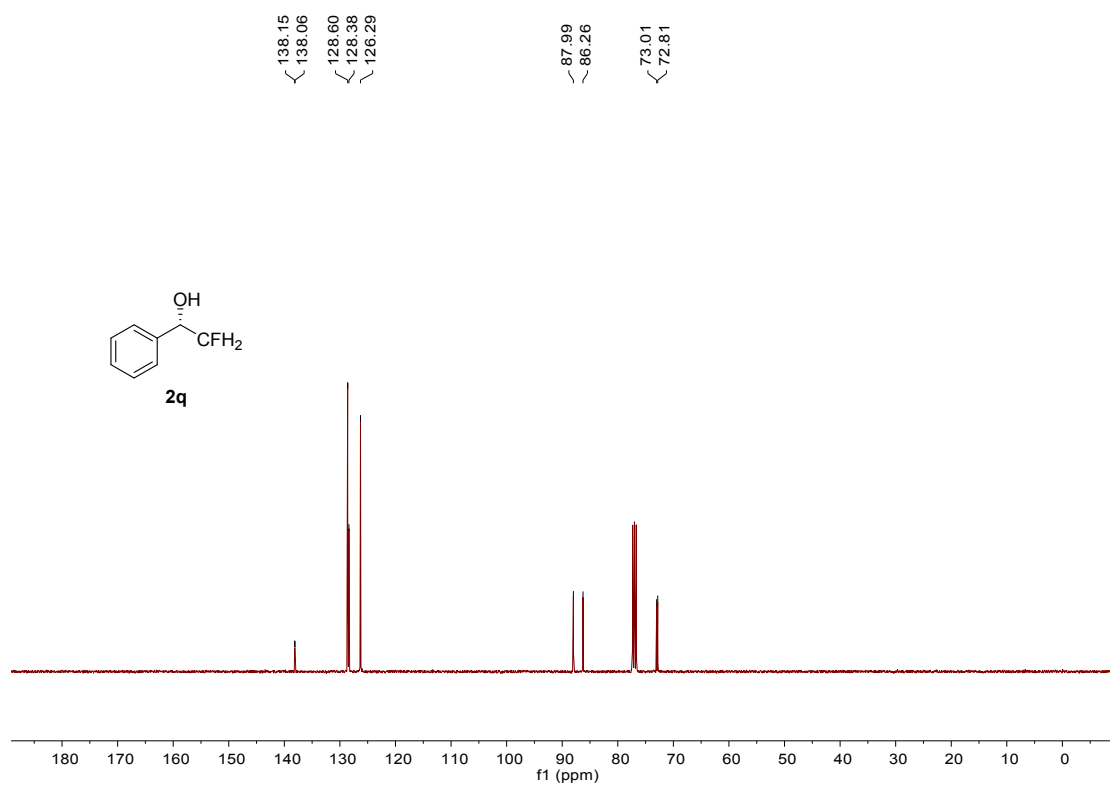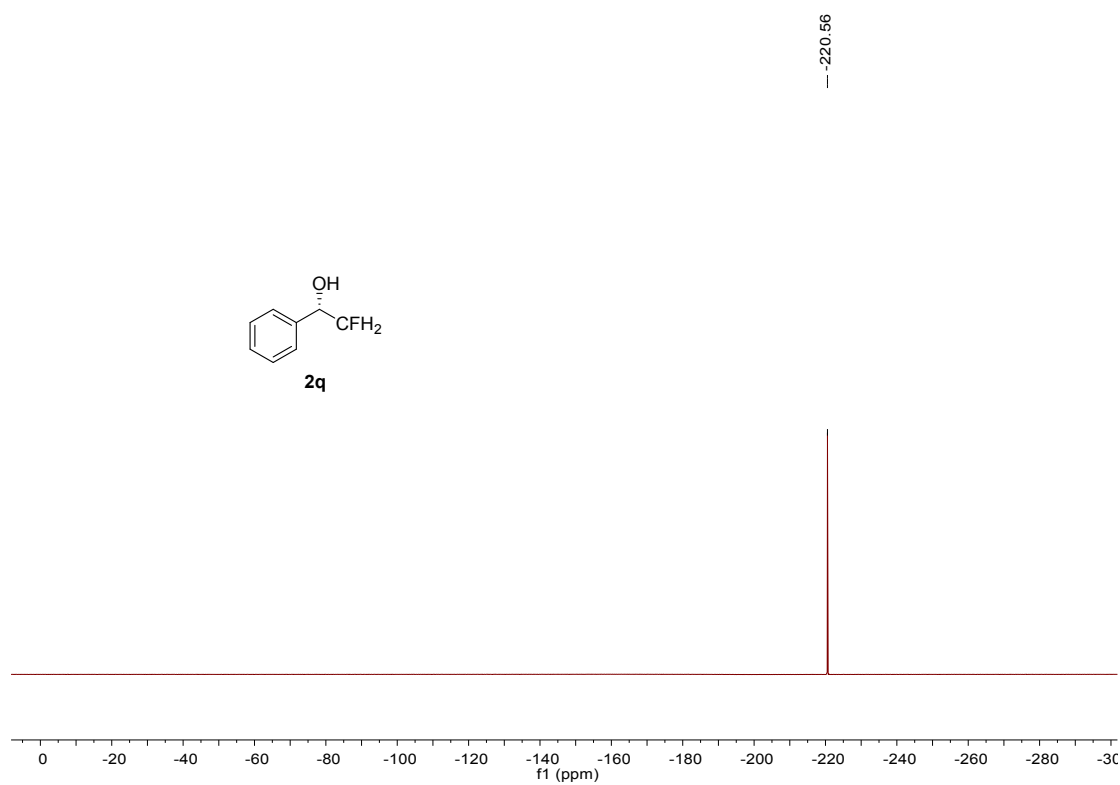

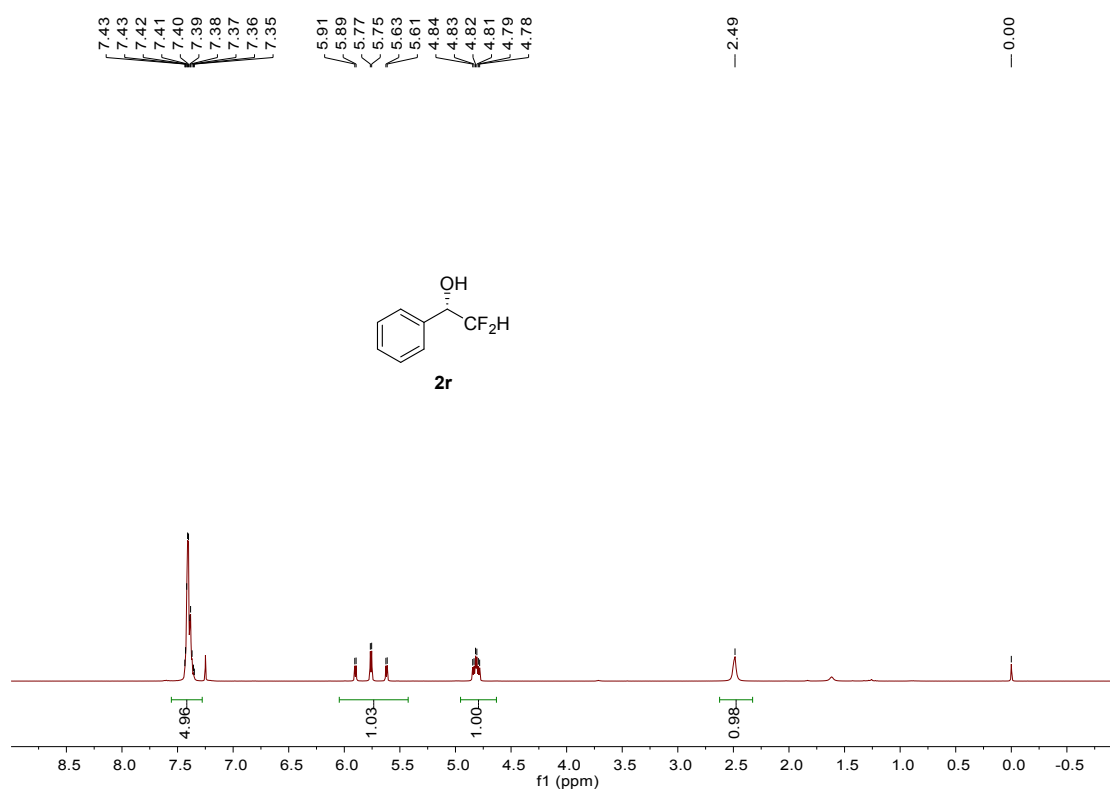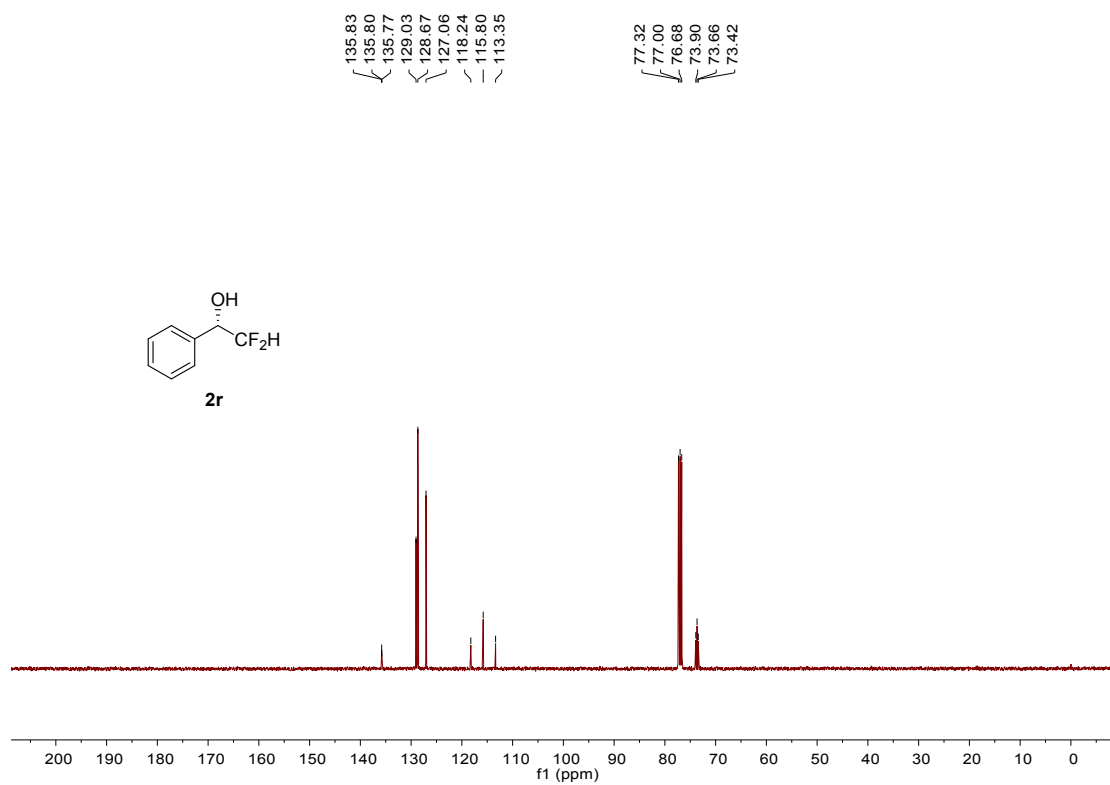

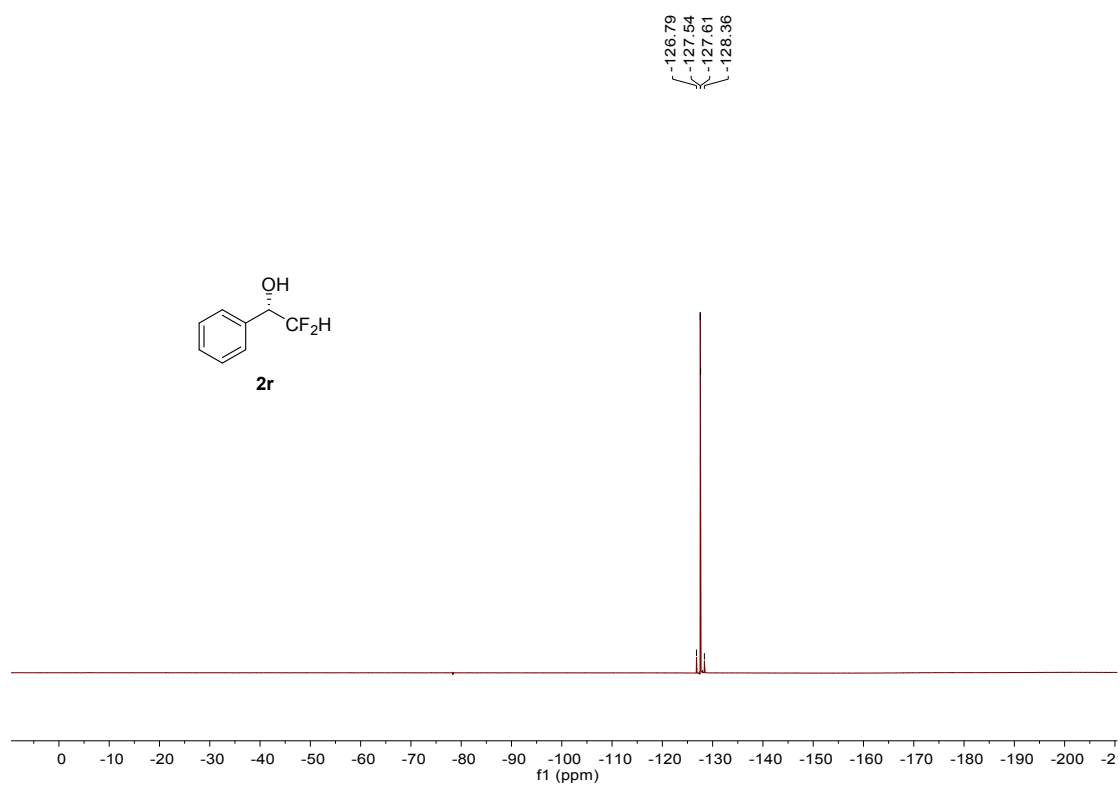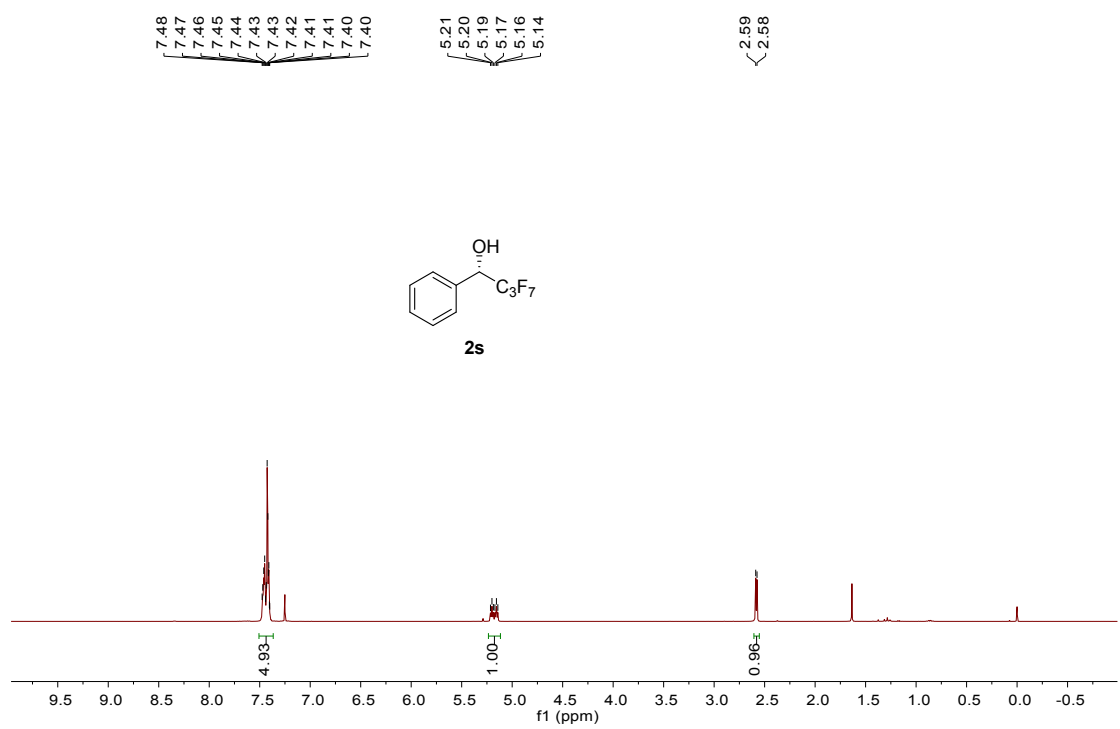

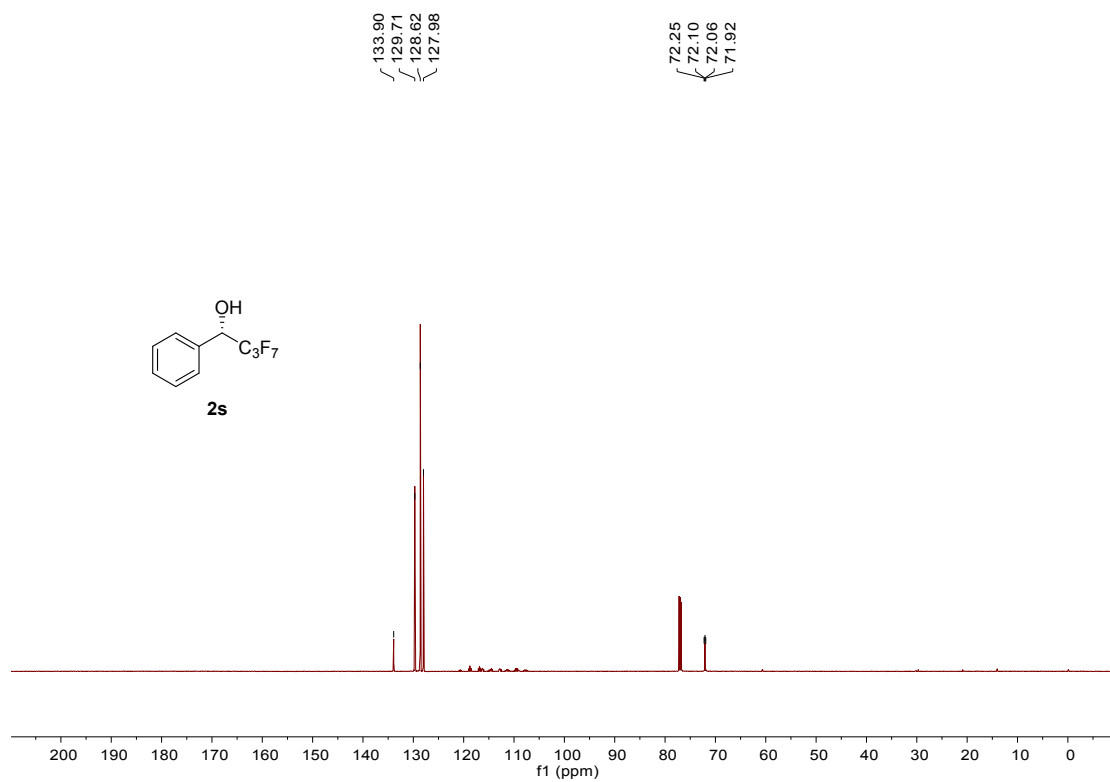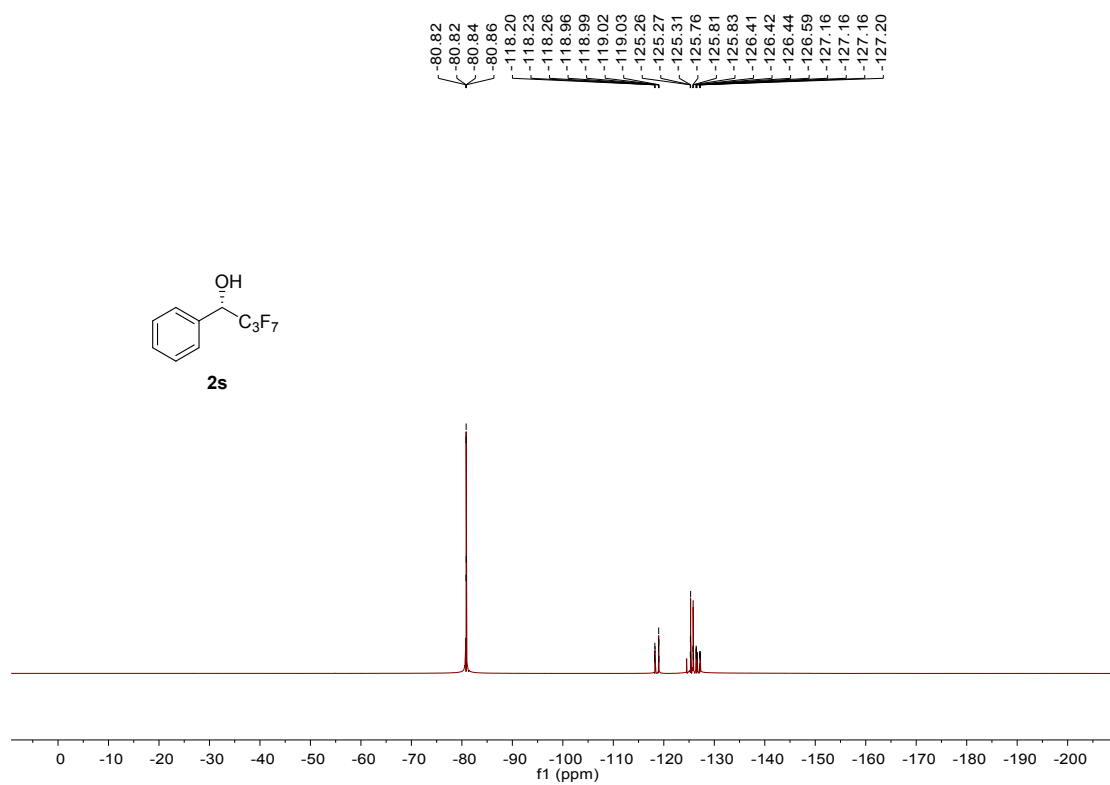



7.40  
7.40  
7.38  
7.35  
7.33  
7.31  
7.30  
7.29  
7.27  
6.84  
6.80  
6.21  
6.19  
6.17  
6.15  
4.62  
4.61  
4.59  
4.58  
2.70  
2.69

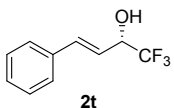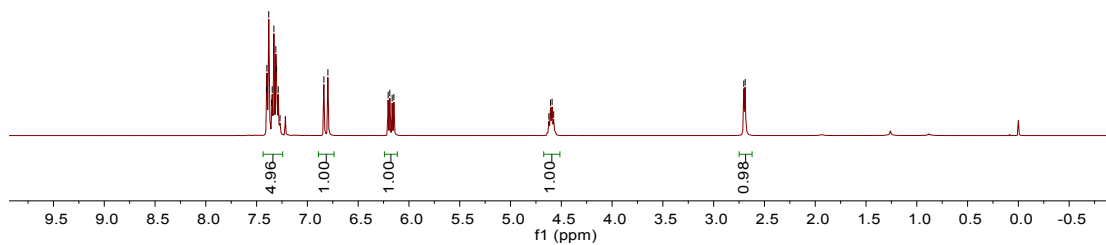

136.38  
135.28  
128.74  
128.71  
128.45  
126.86  
125.64  
122.84  
120.51  
120.49  
120.47  
120.04  
77.32  
77.00  
76.68  
72.08  
71.76  
71.44  
71.12

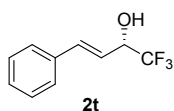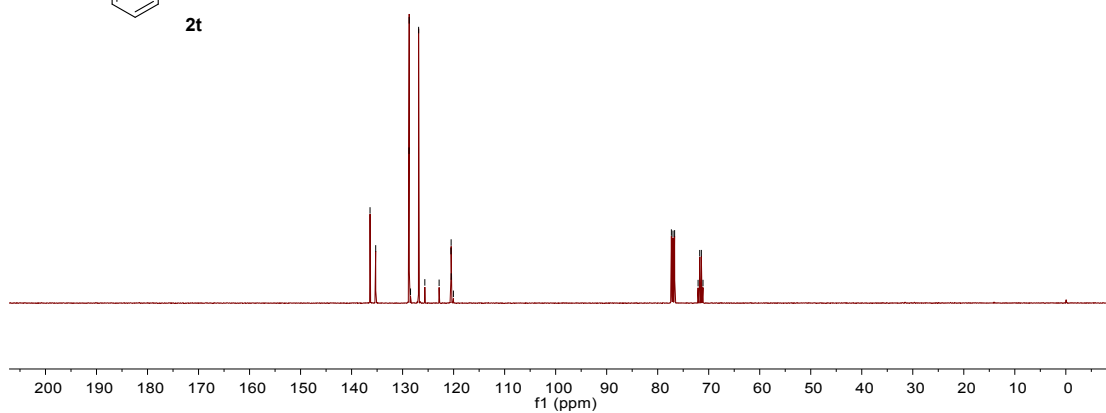

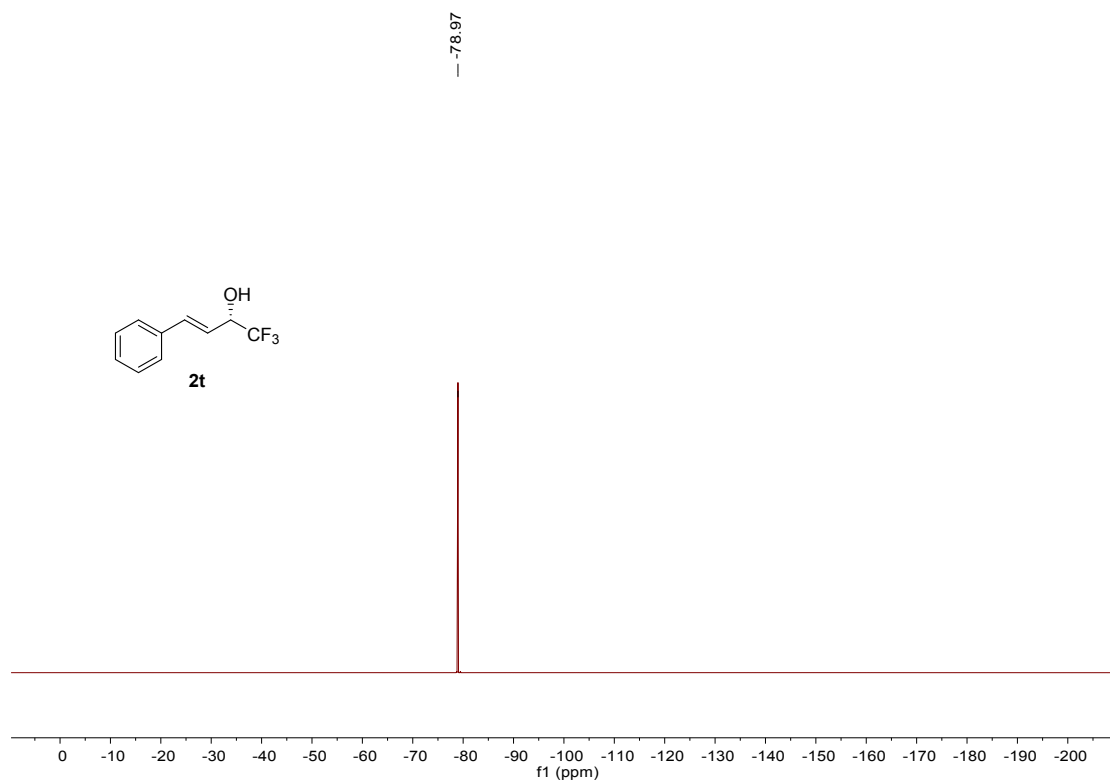

7.29  
7.27  
7.14  
7.12  
6.75  
6.79  
6.15  
6.13  
6.11  
6.09

4.60  
4.59  
4.57  
4.55  
4.54

— 2.71  
— 2.33

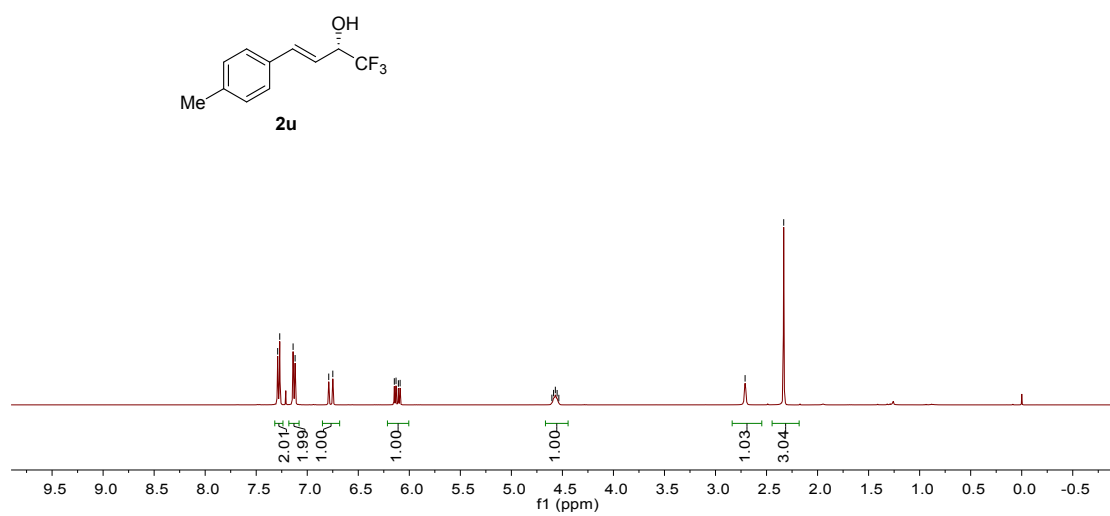

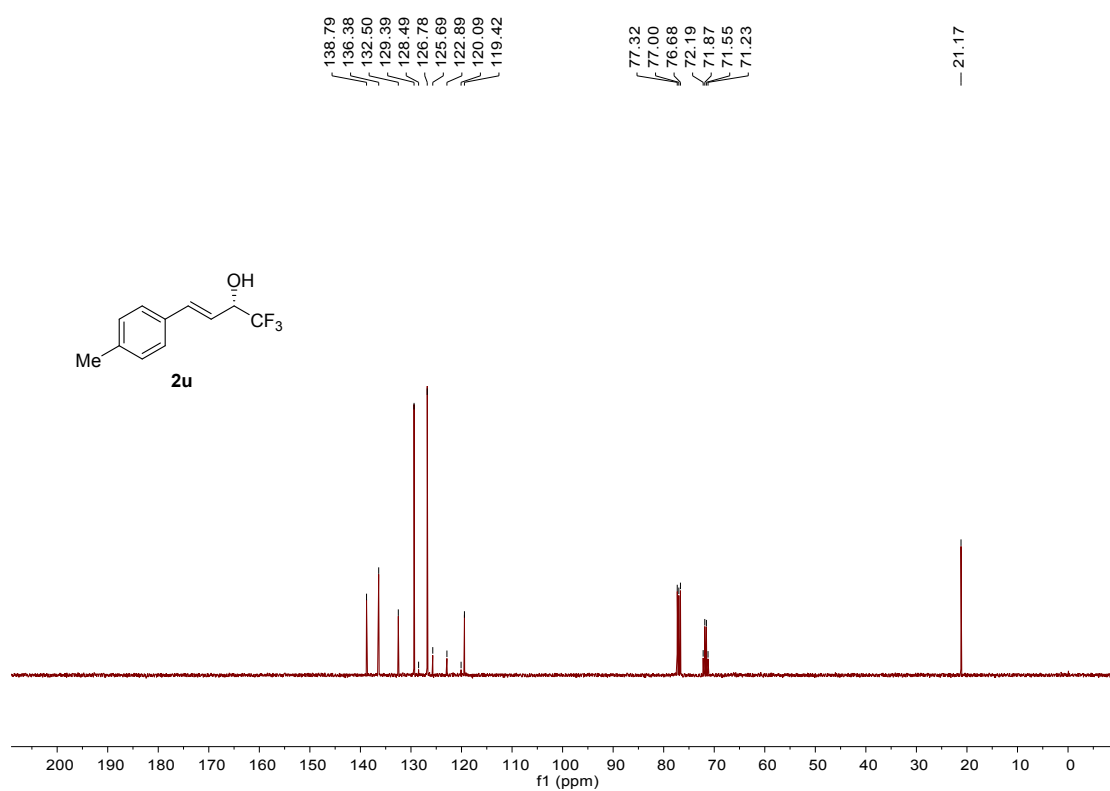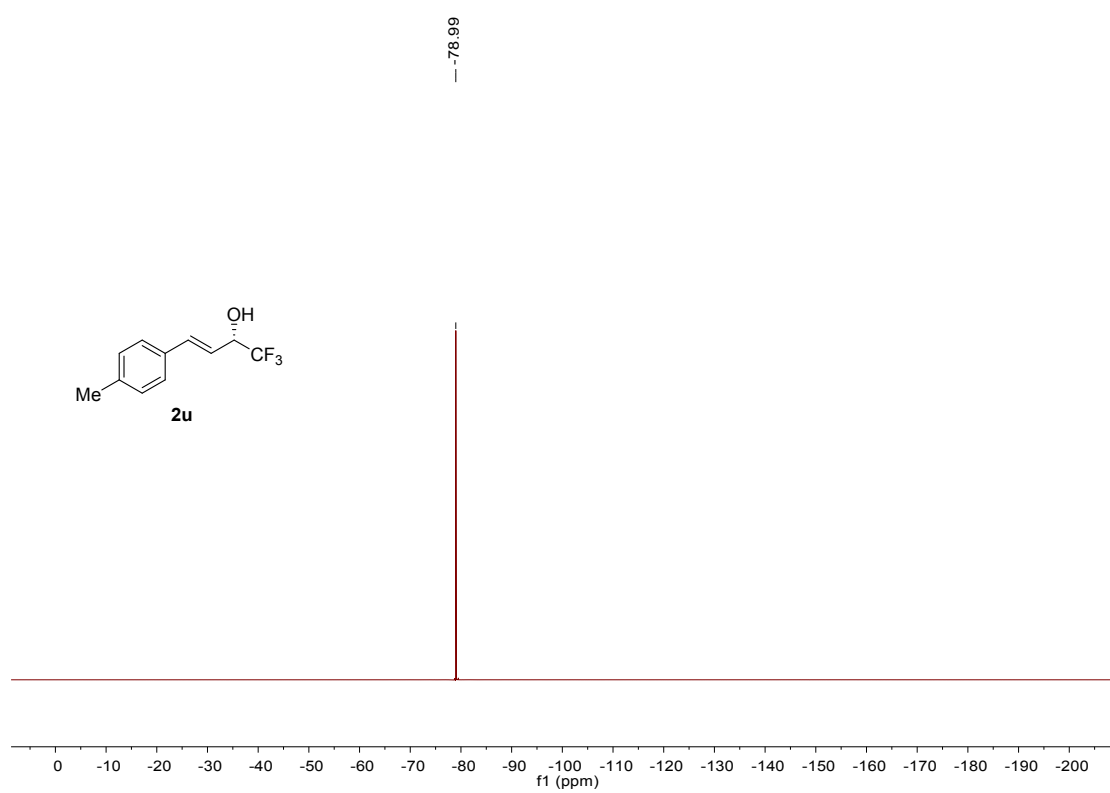

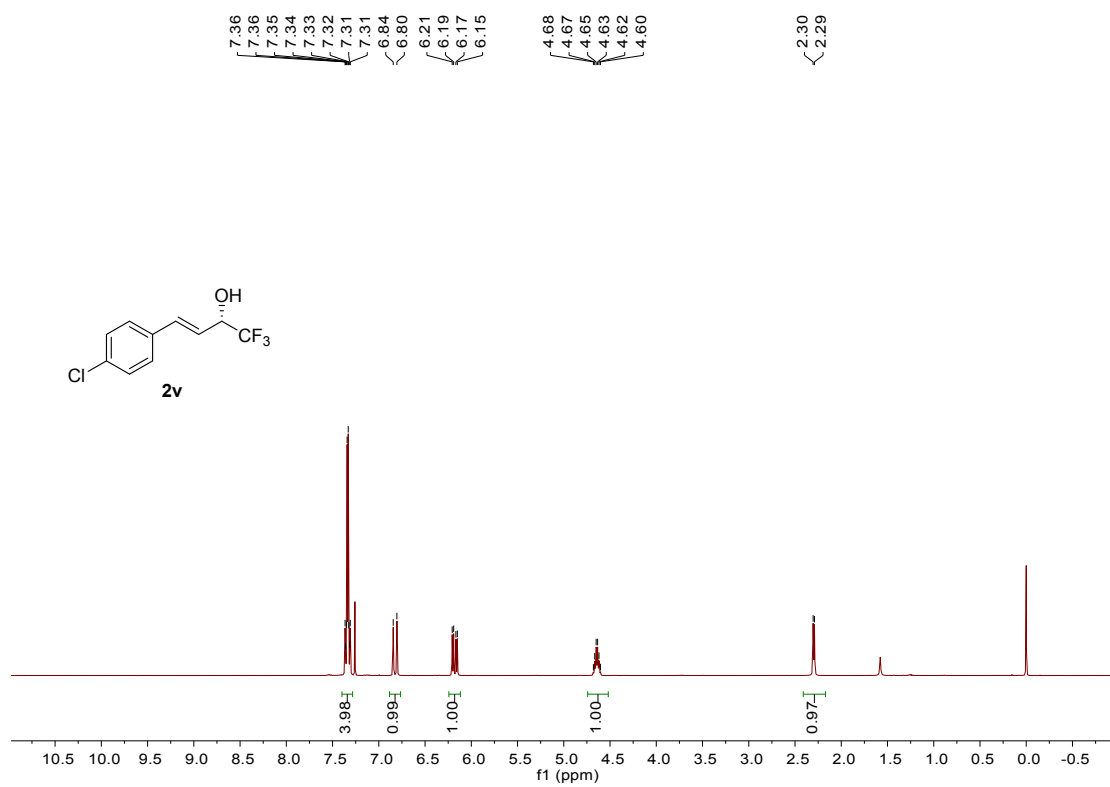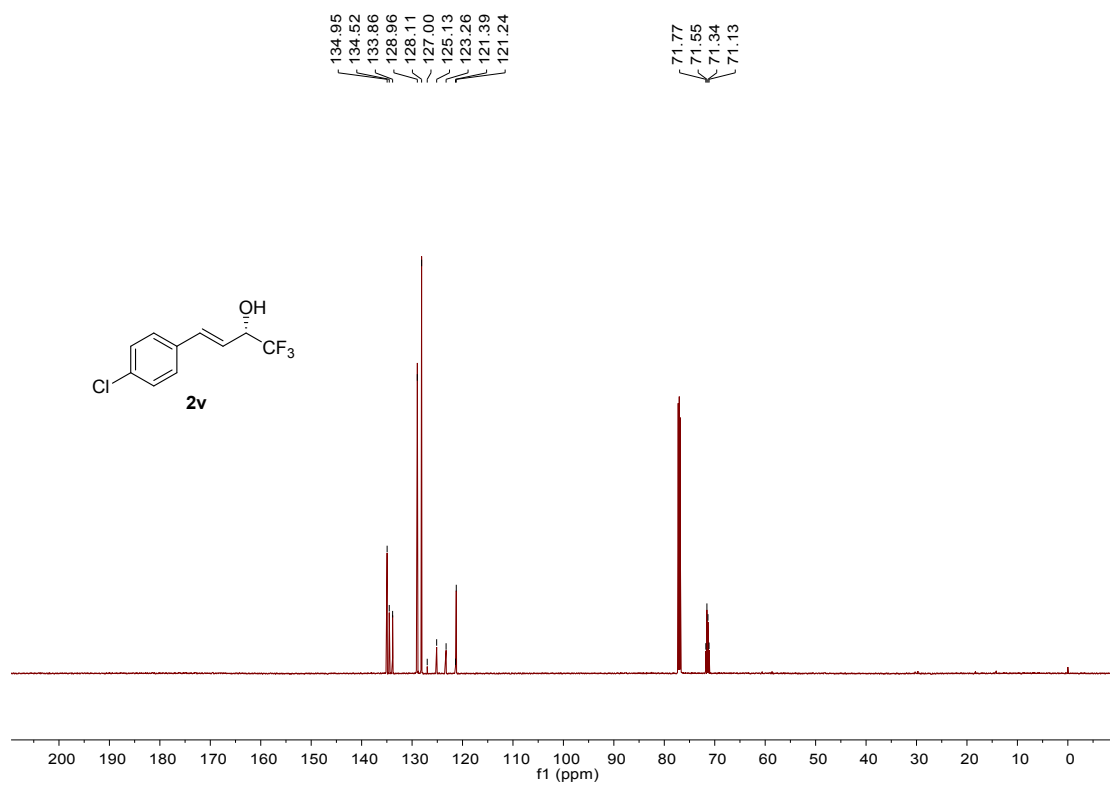

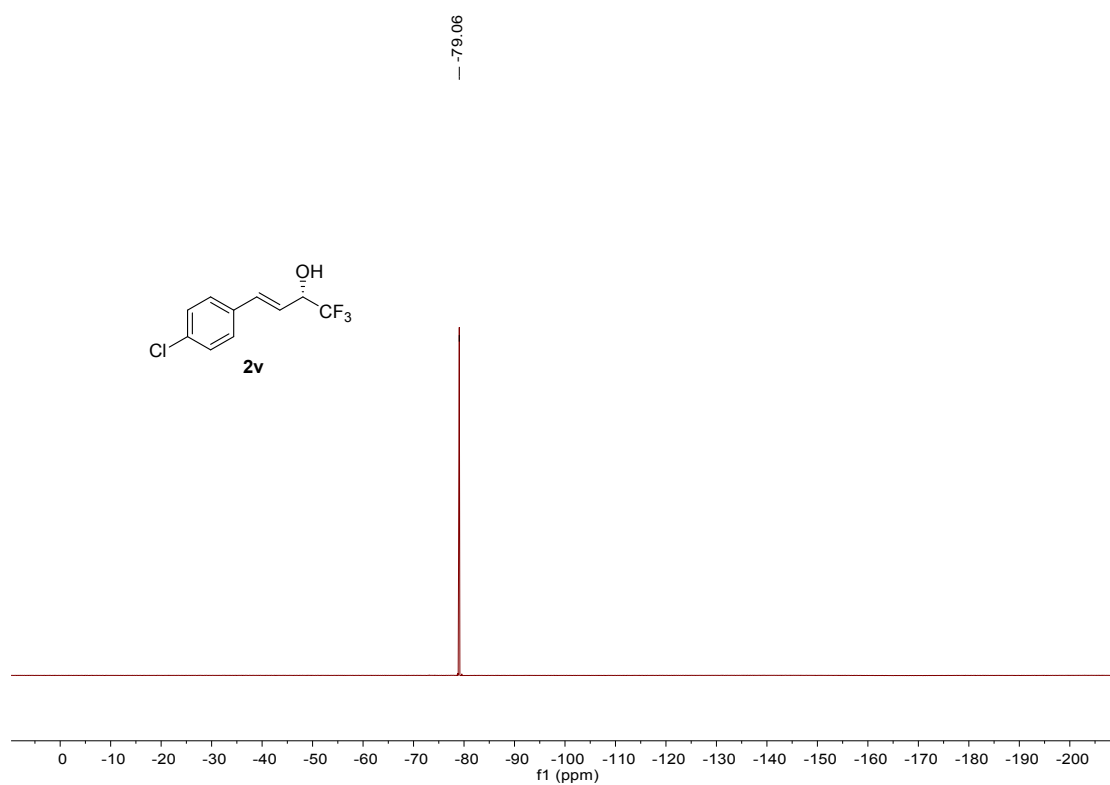

7.48  
7.48  
7.47  
7.47  
7.46  
7.46  
7.45  
7.45  
7.28  
7.28  
7.27  
7.26  
7.26  
7.25  
7.25  
6.81  
6.77  
6.21  
6.20  
6.17  
6.16  
4.67  
4.66  
4.65  
4.65  
4.64  
4.63  
4.62  
4.61  
4.60  
4.59  
4.59  
2.50  
2.49

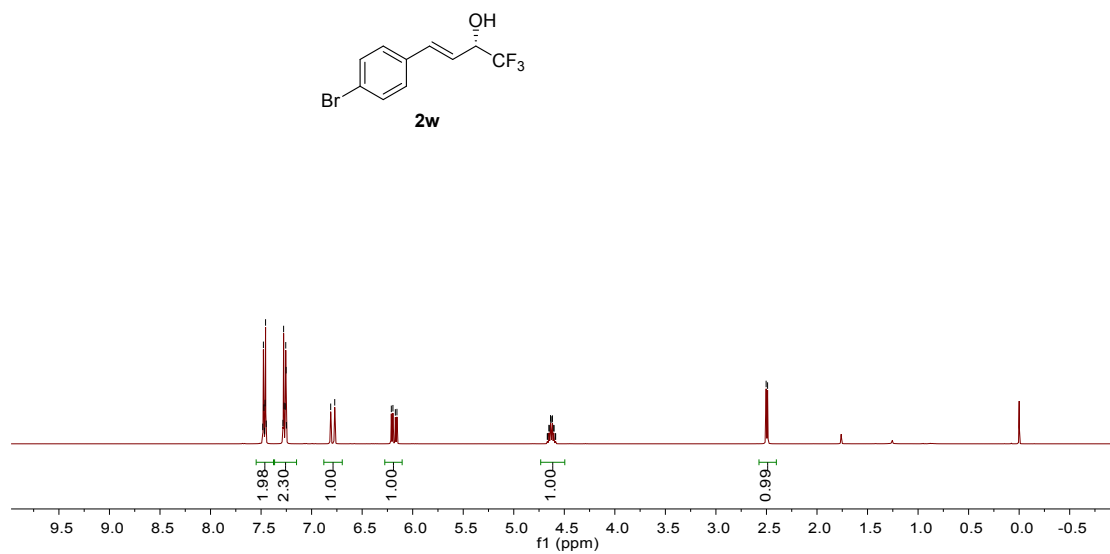

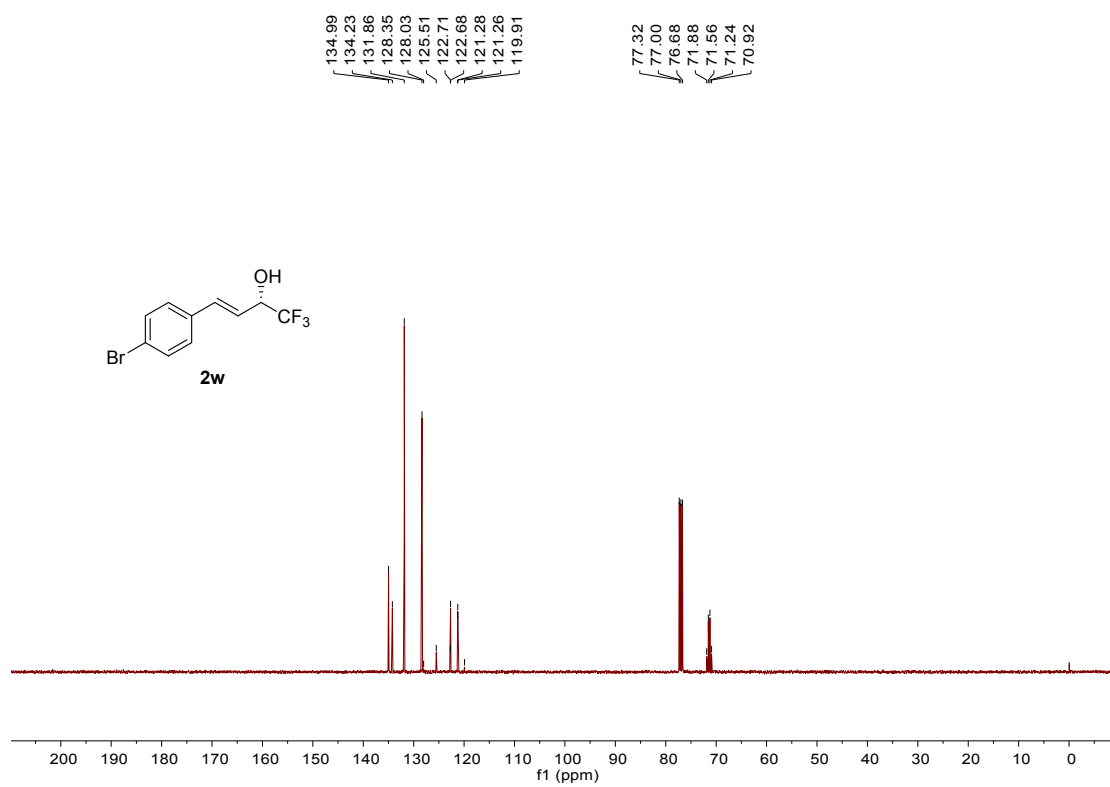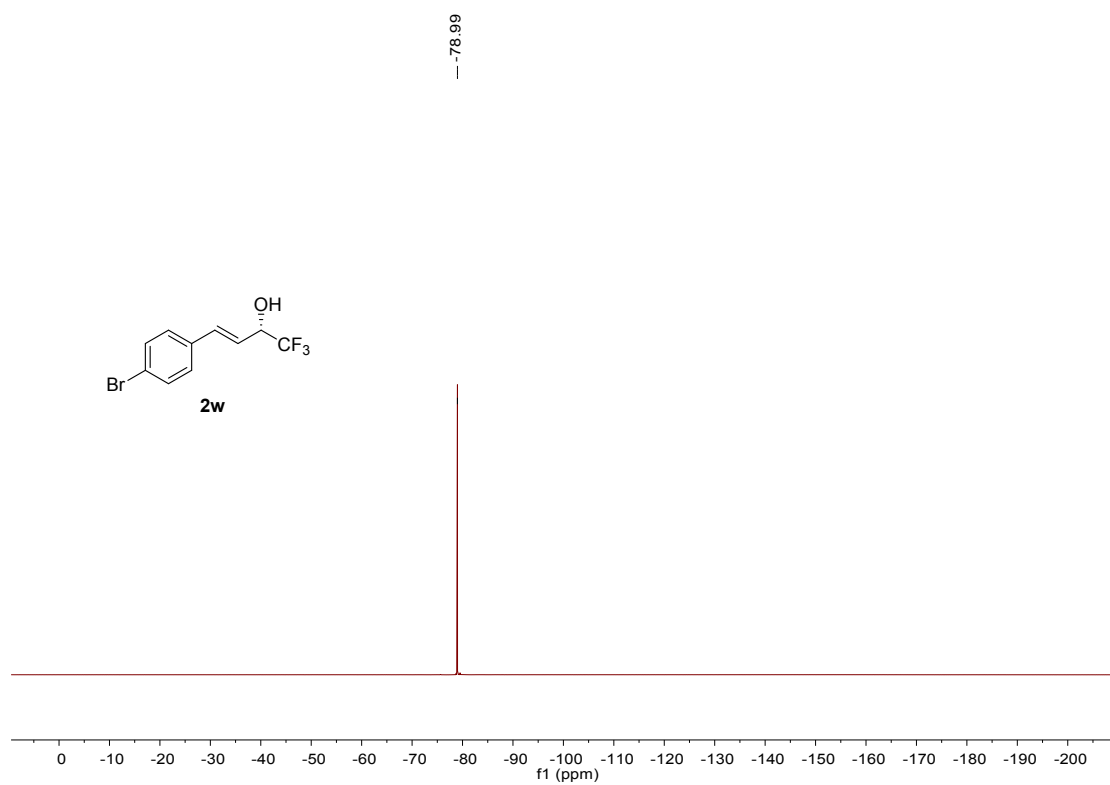

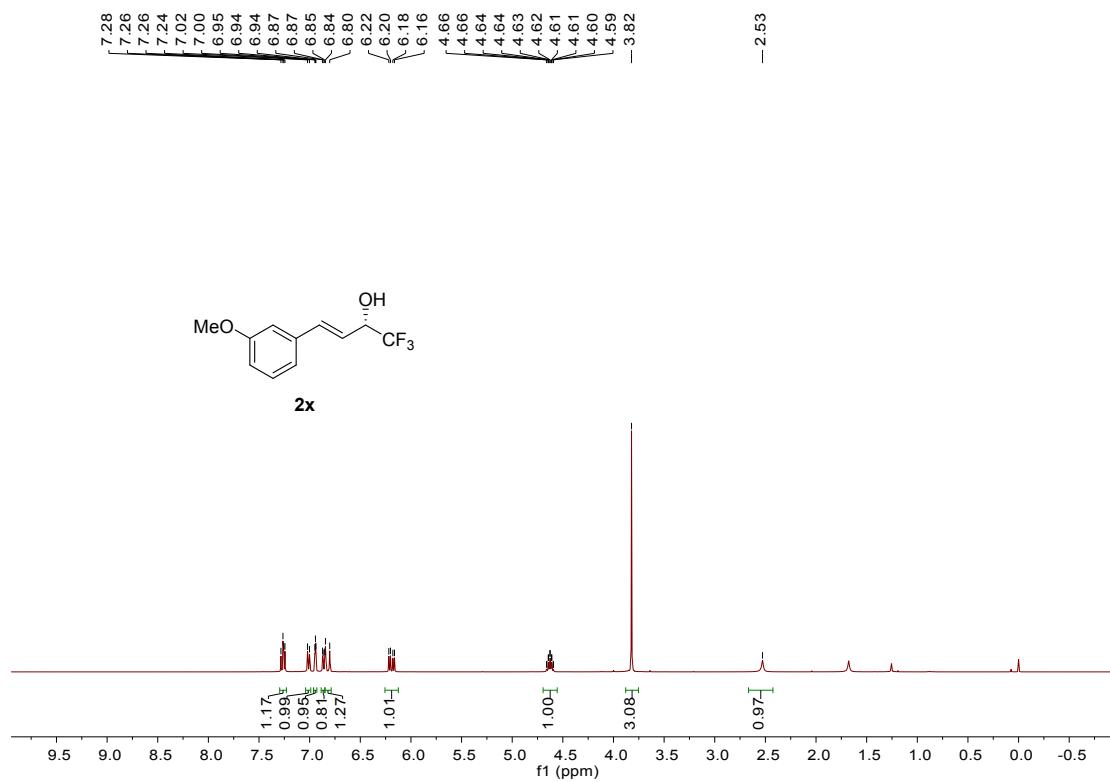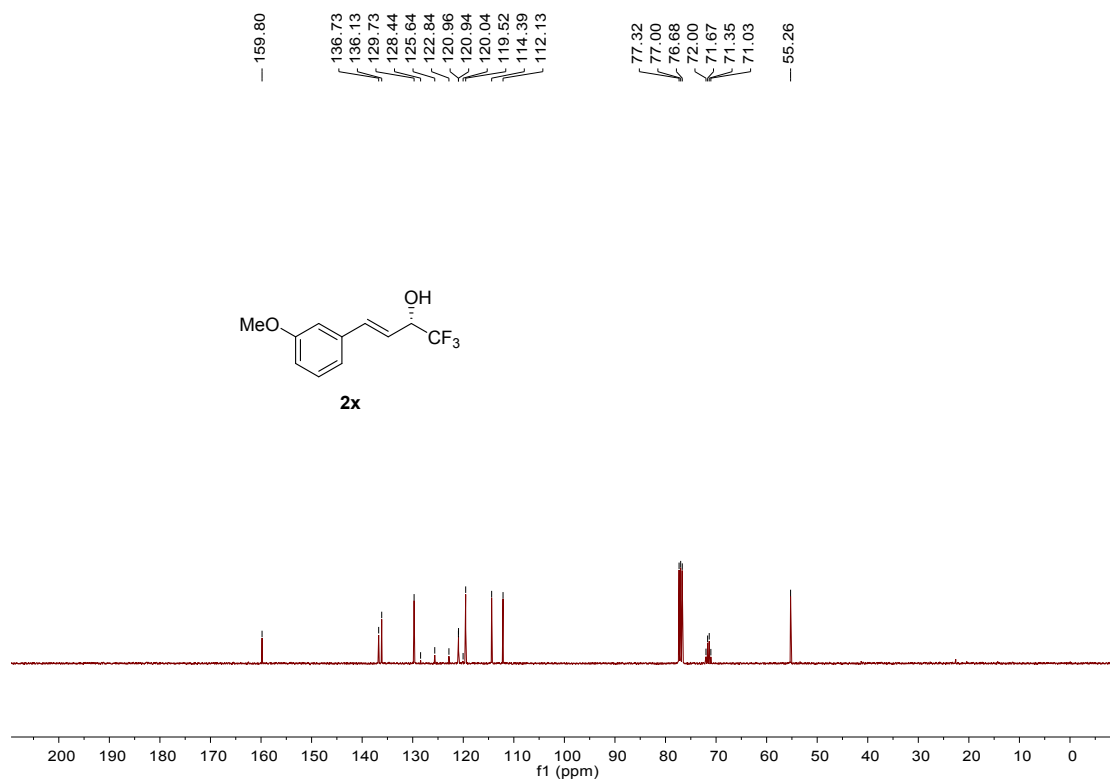

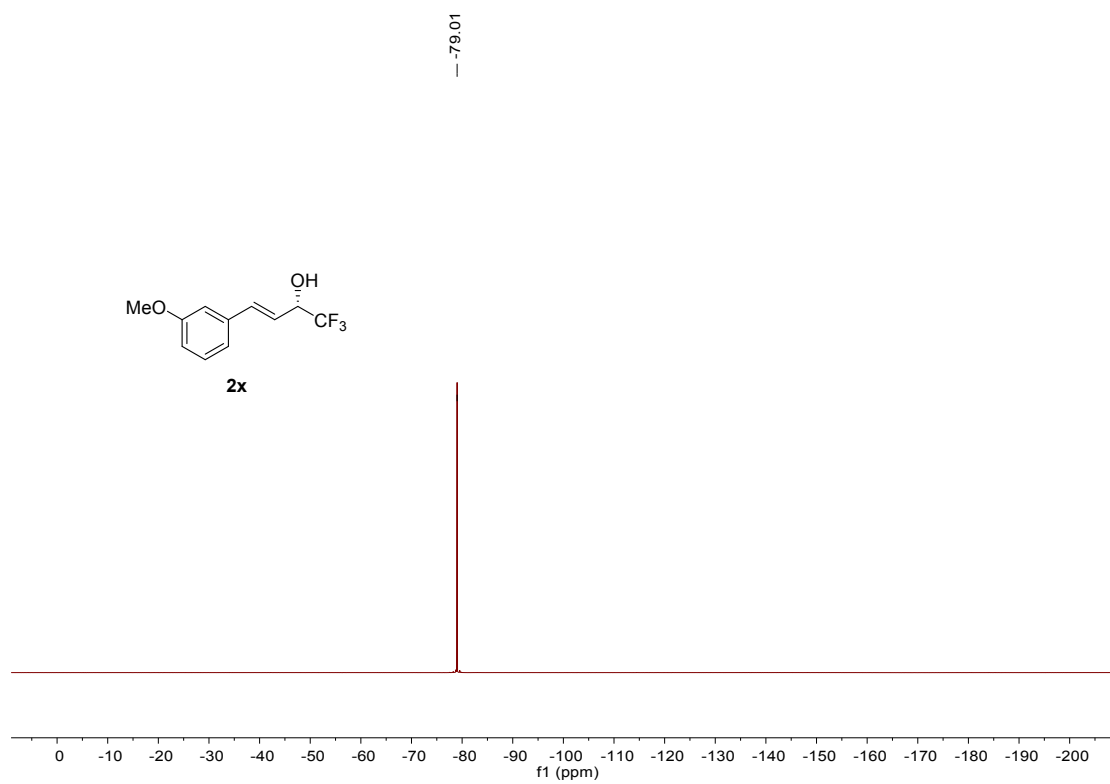

7.42  
7.41  
7.40  
7.40  
7.29  
7.28  
7.27  
7.25  
7.24  
7.16  
7.12  
6.94  
6.92  
6.90  
6.88  
6.86  
6.26  
6.24  
6.22  
6.20

4.62  
4.60  
4.59  
4.57

— 3.82

2.69  
2.68

— 0.00

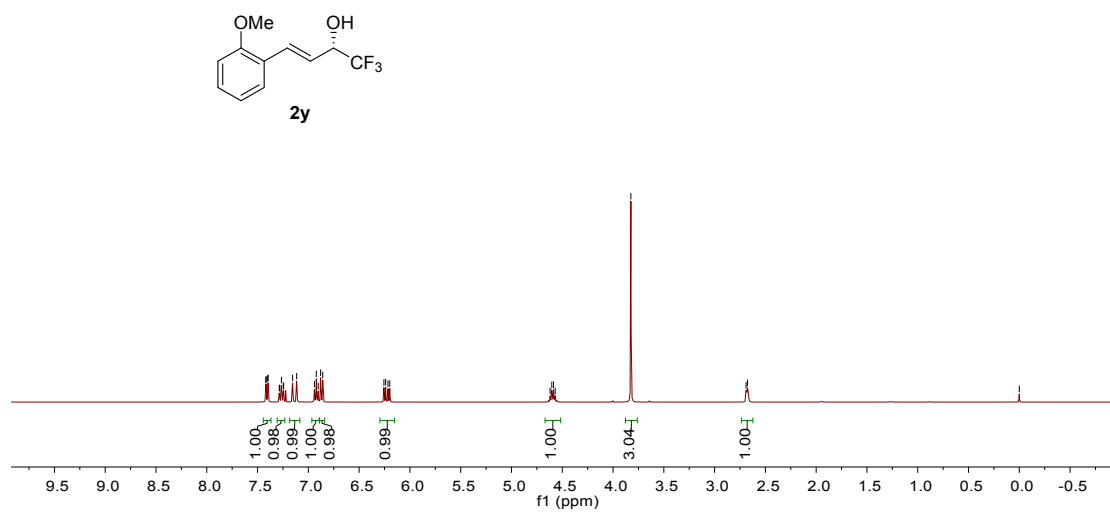

1.00  
0.98  
0.99  
1.00  
0.98

0.99

1.00

3.04

1.00



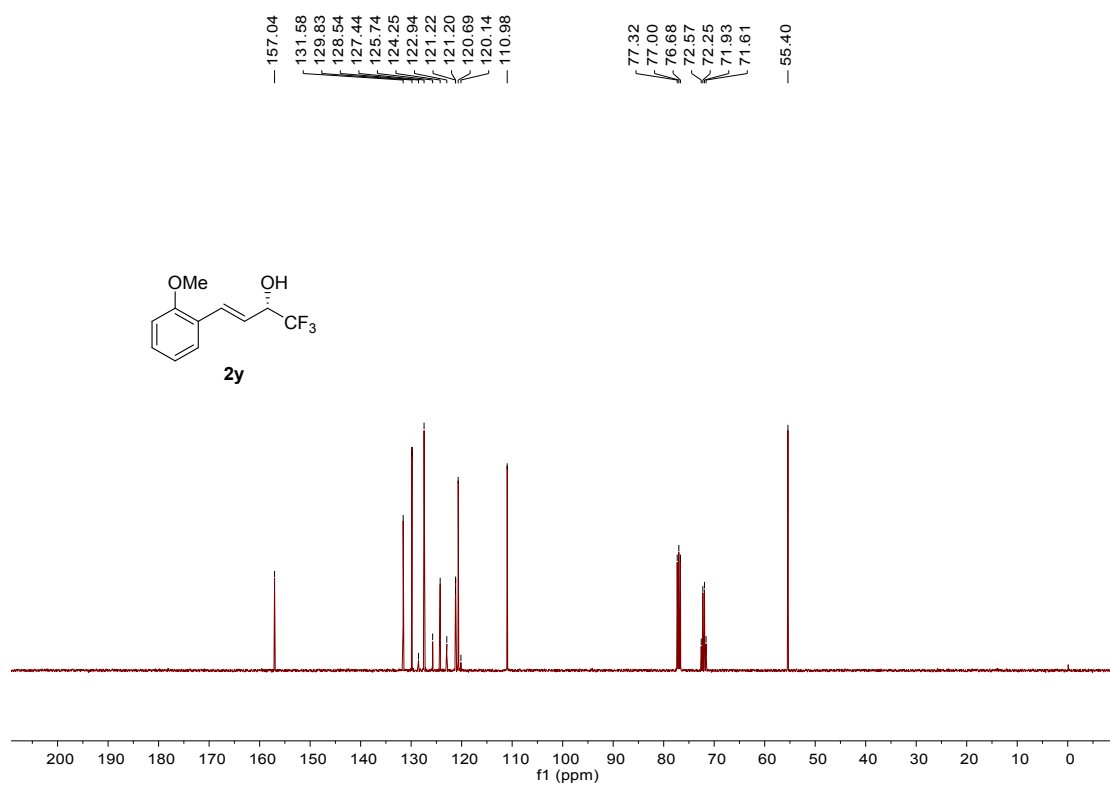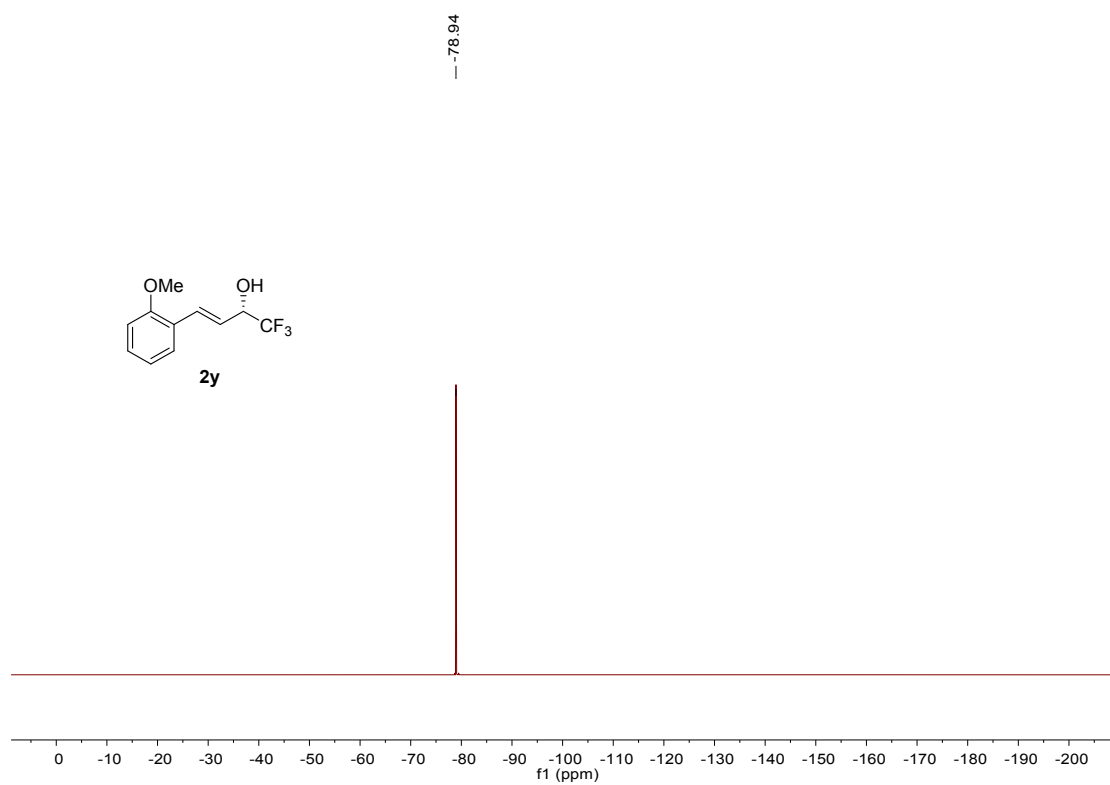

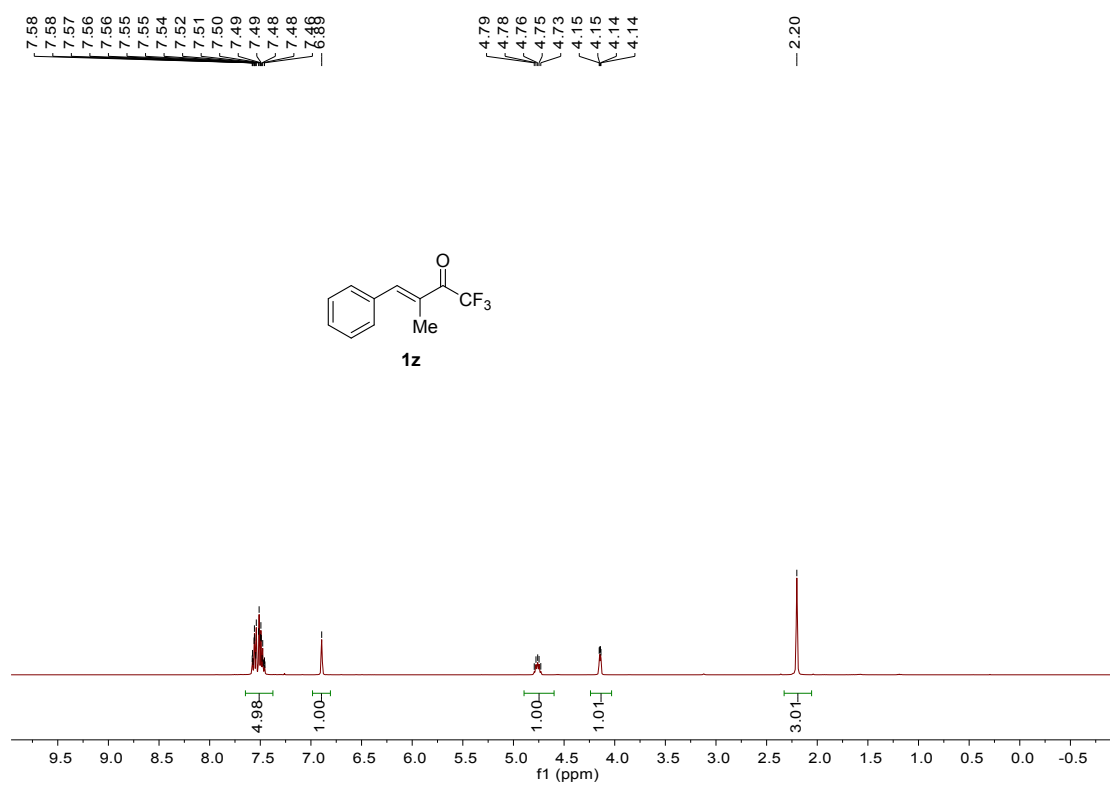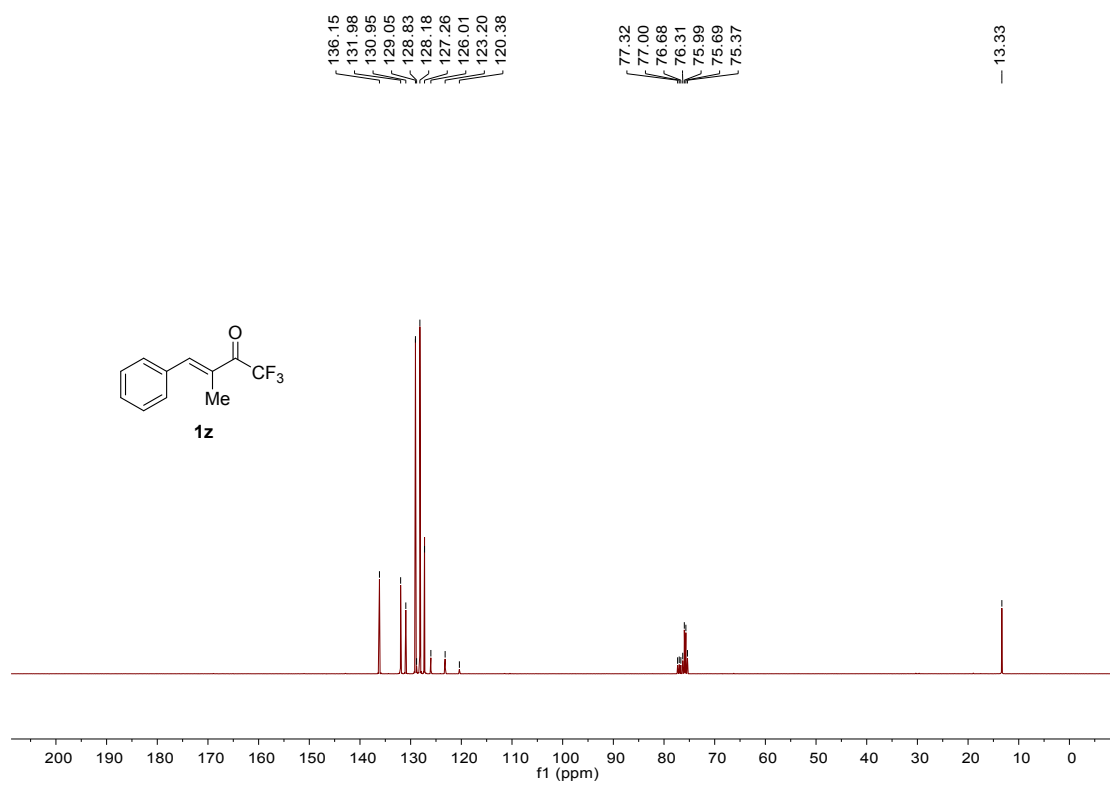

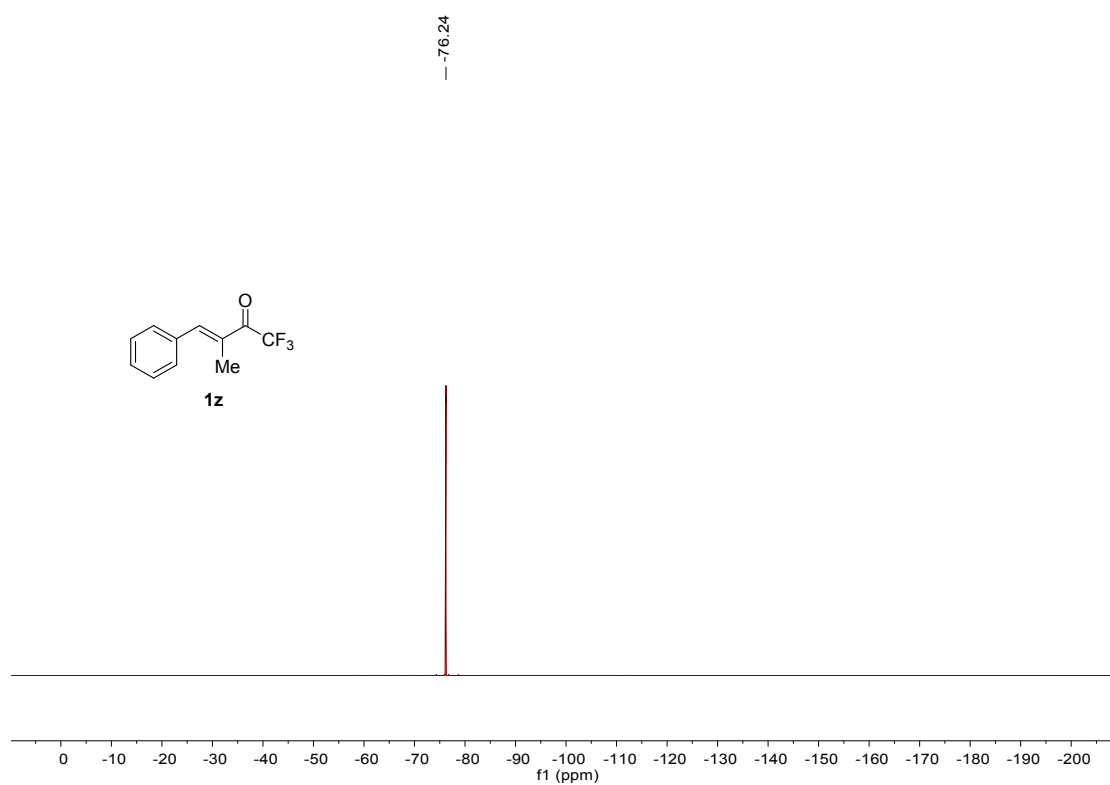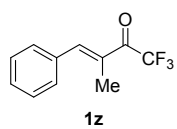

7.37  
7.37  
7.36  
7.35  
7.34  
7.33  
7.28  
7.28  
7.26  
7.25  
7.25

4.89  
4.88  
4.87  
4.86

2.00  
1.49  
1.48

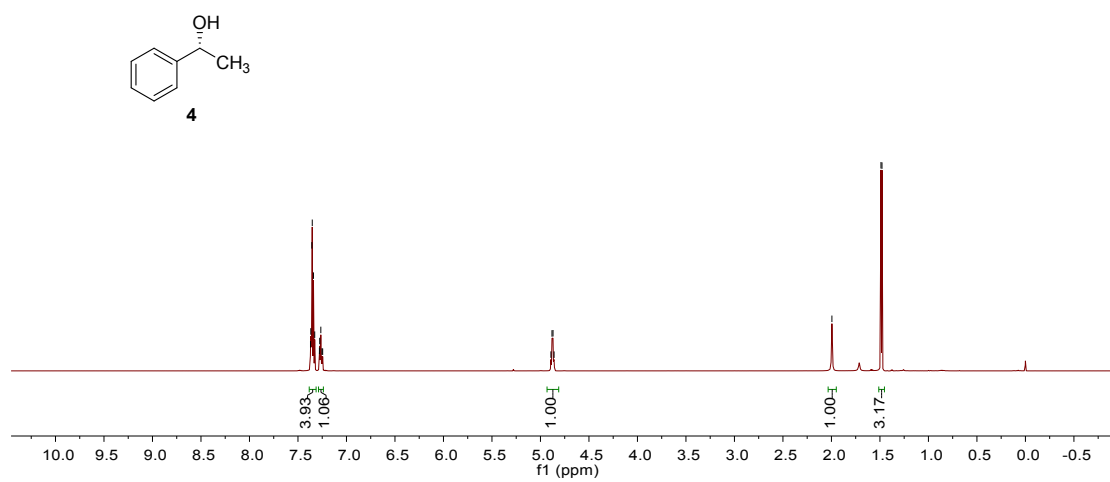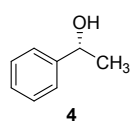

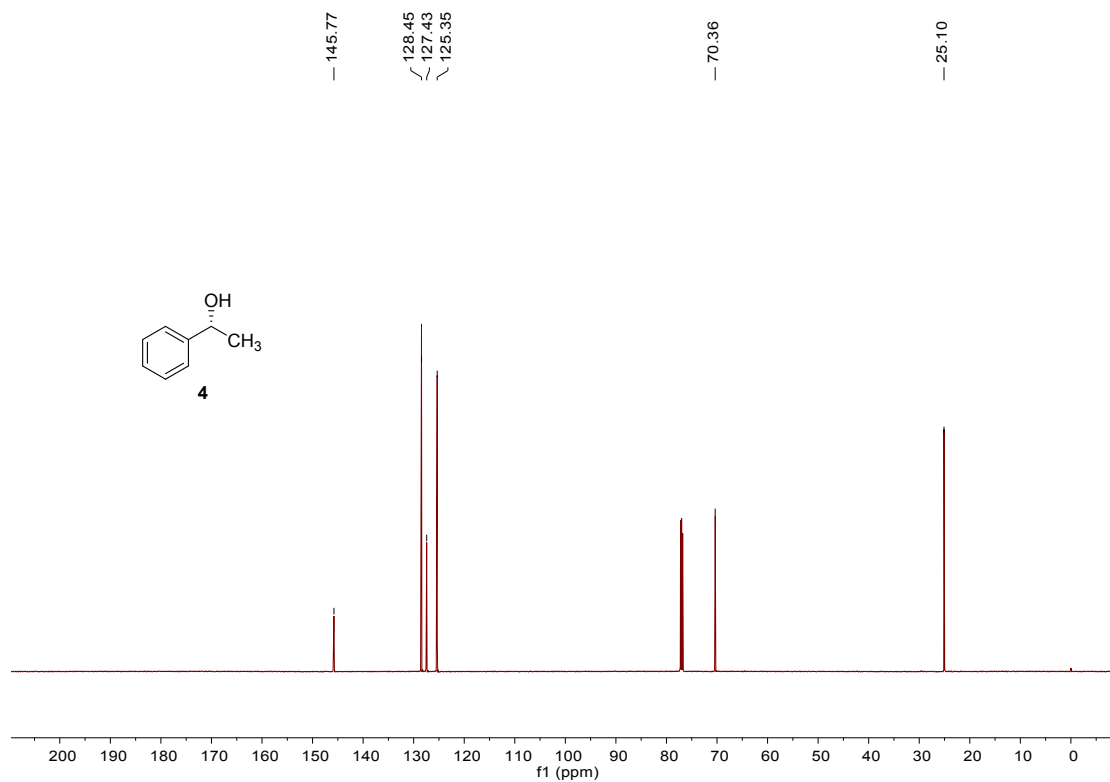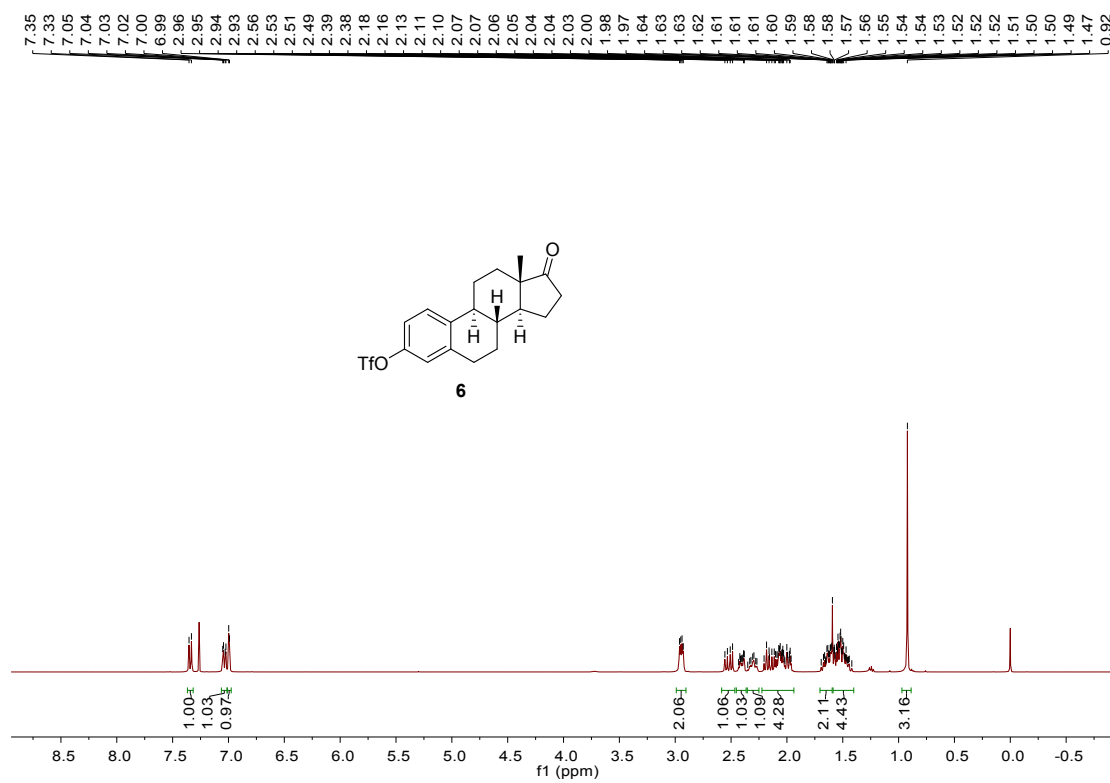

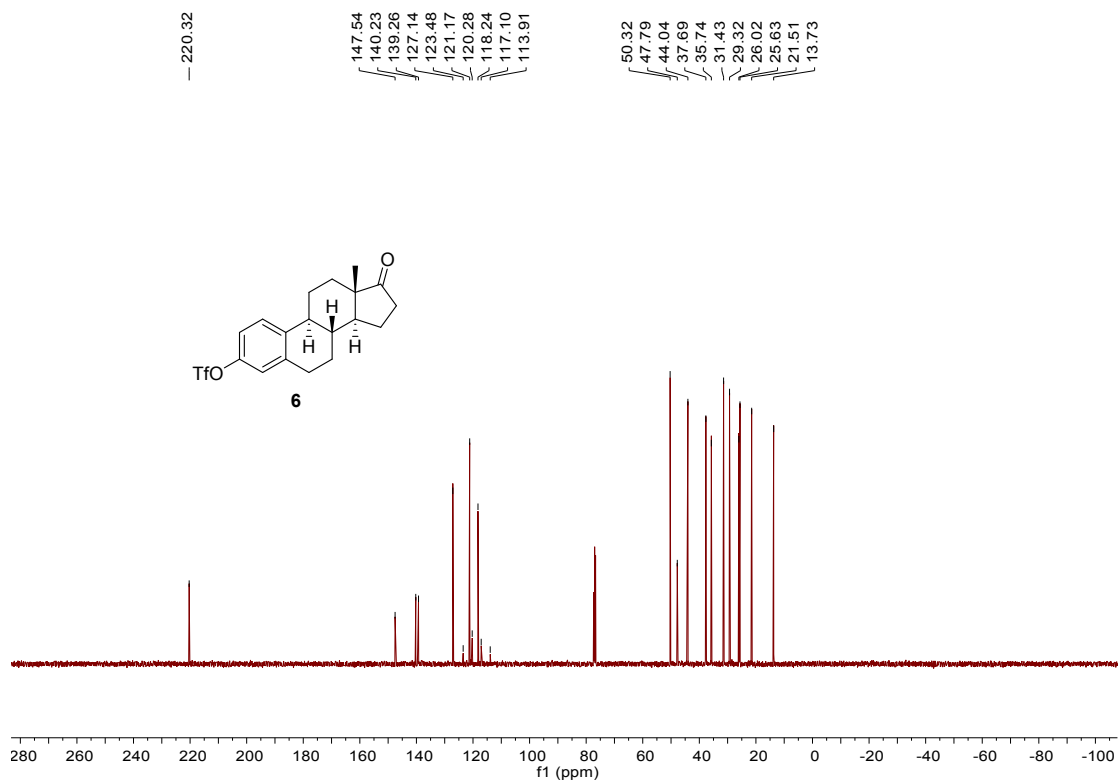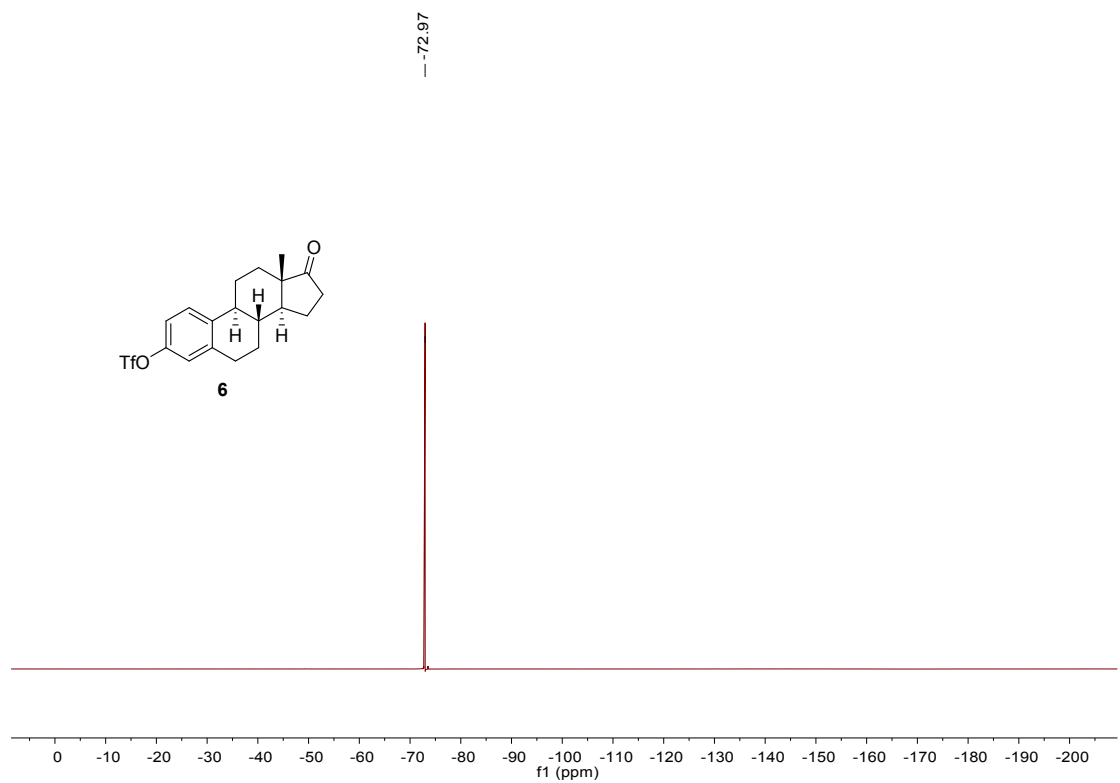

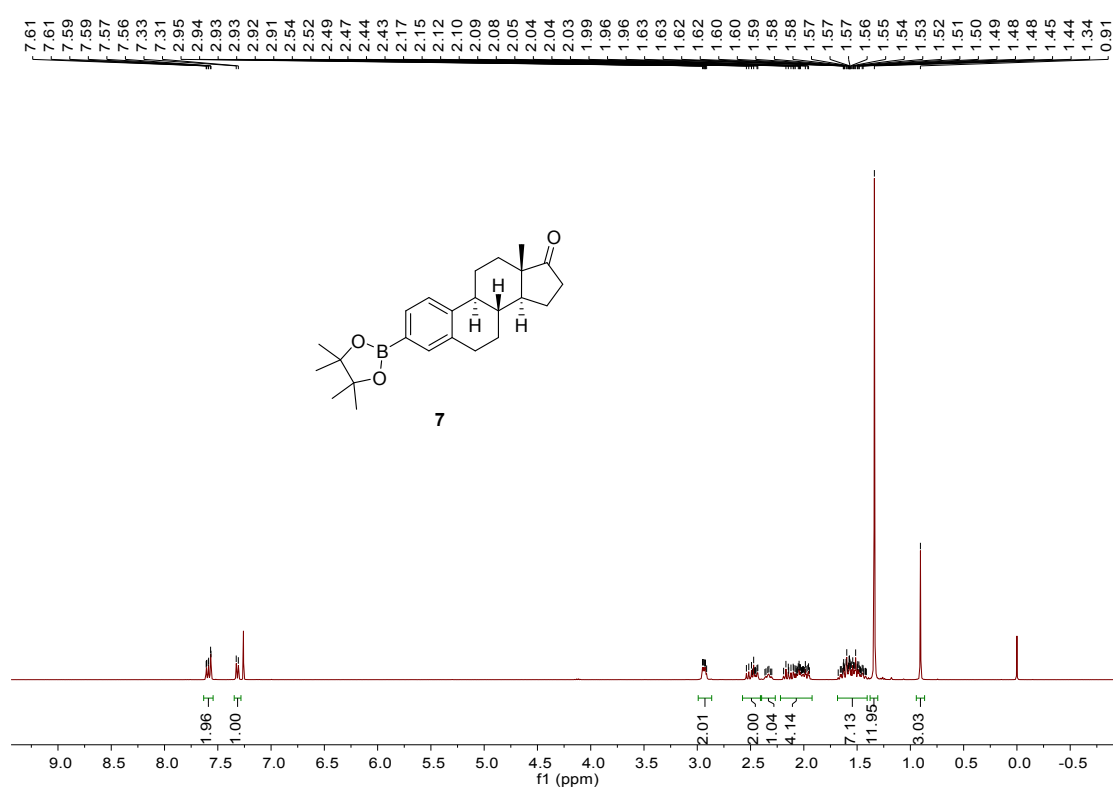

- 220.76
- ✓ 143.07
- ✓ 135.74
- ✓ 135.51
- ✓ 132.09
- ✓ 124.71
- 83.59
- 50.49
- 47.88
- 44.62
- 37.94
- 35.77
- 31.52
- 29.07
- 26.40
- 25.52
- 24.77
- 24.74
- 21.51
- 13.75

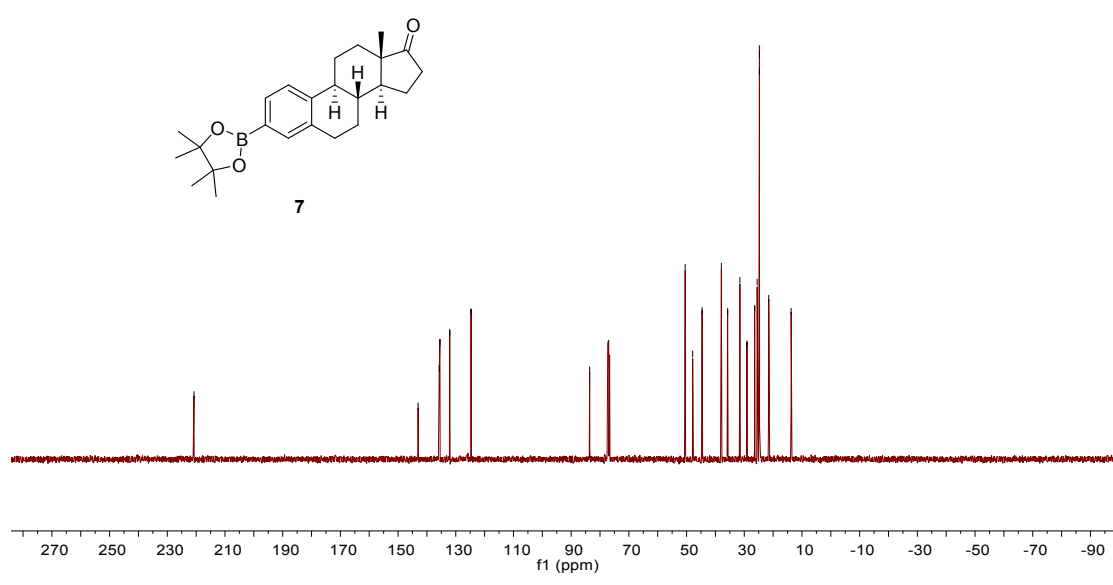

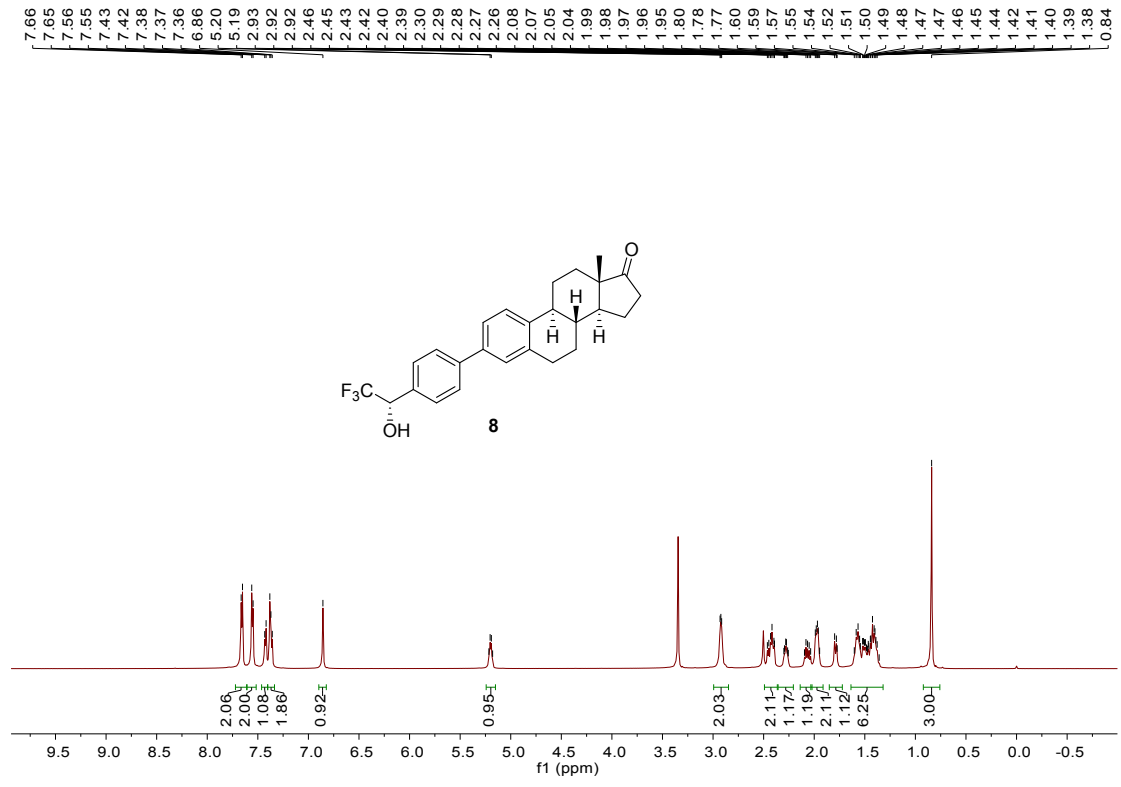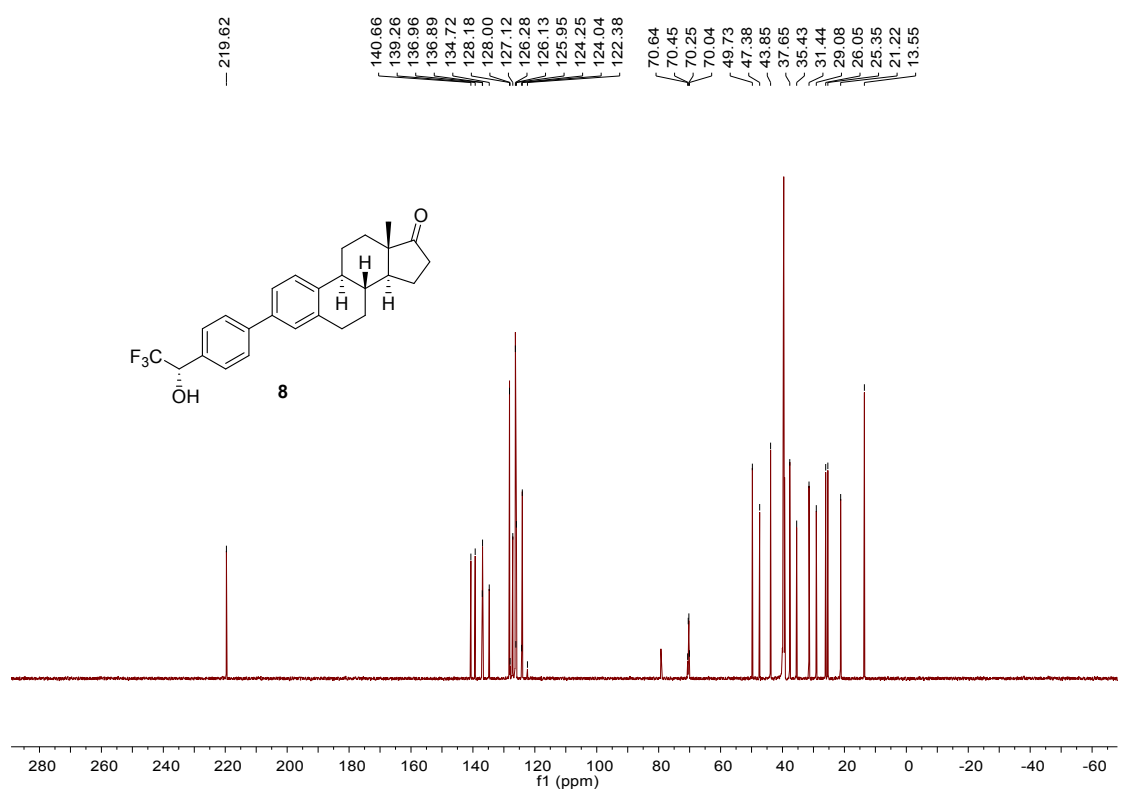

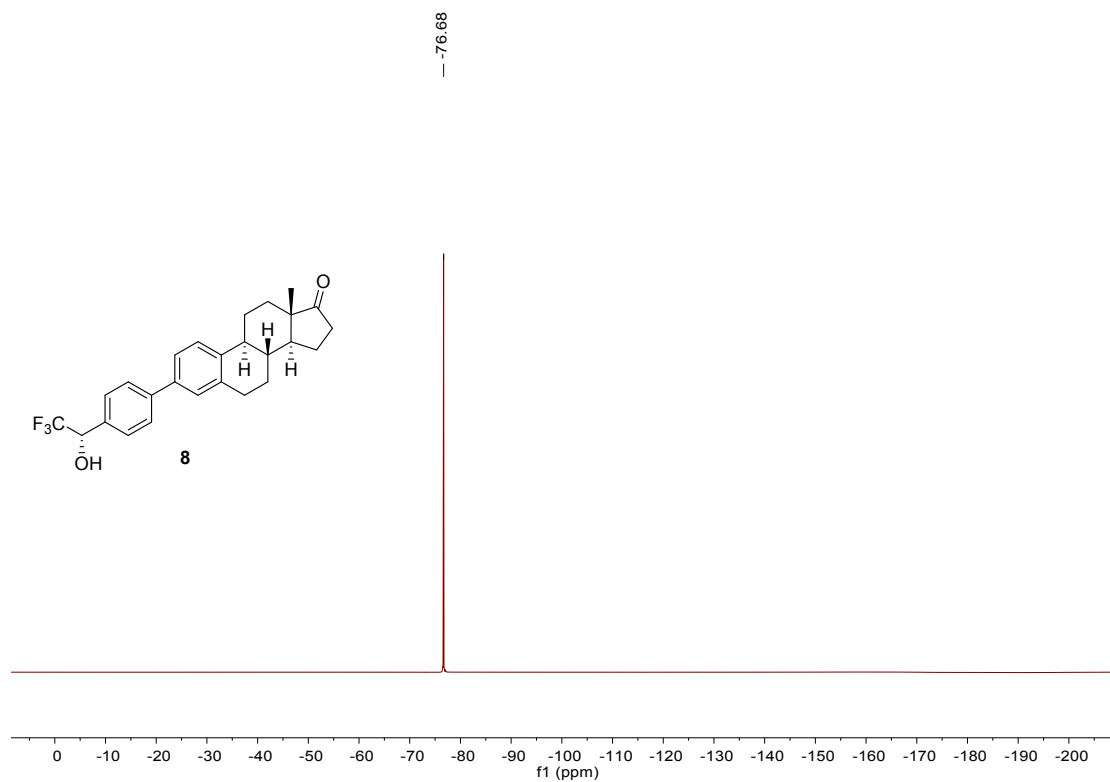

8.02  
7.77  
7.75  
7.66  
7.65  
7.64  
7.63  
7.62  
7.60

5.15  
5.14  
5.13  
5.12  
5.12  
5.10  
5.10  
5.09

3.10  
2.85  
2.84

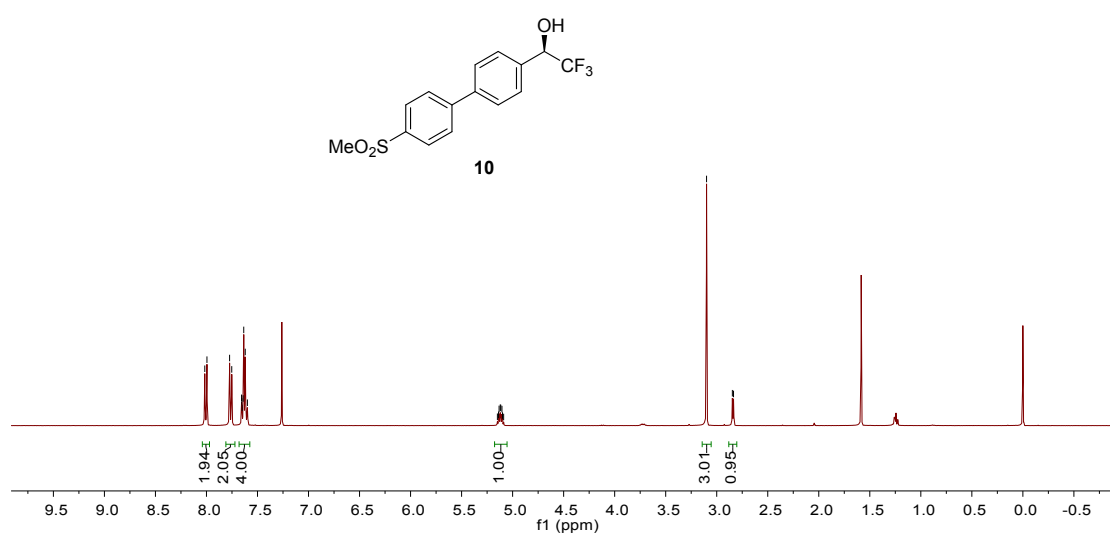



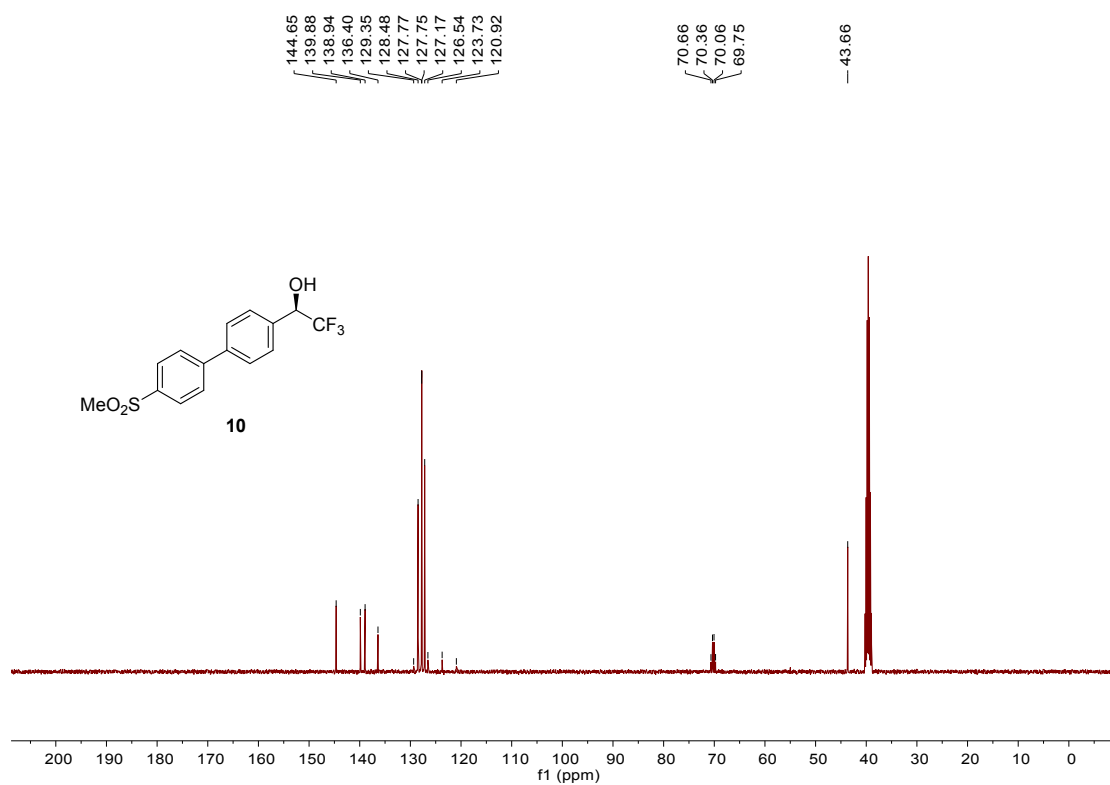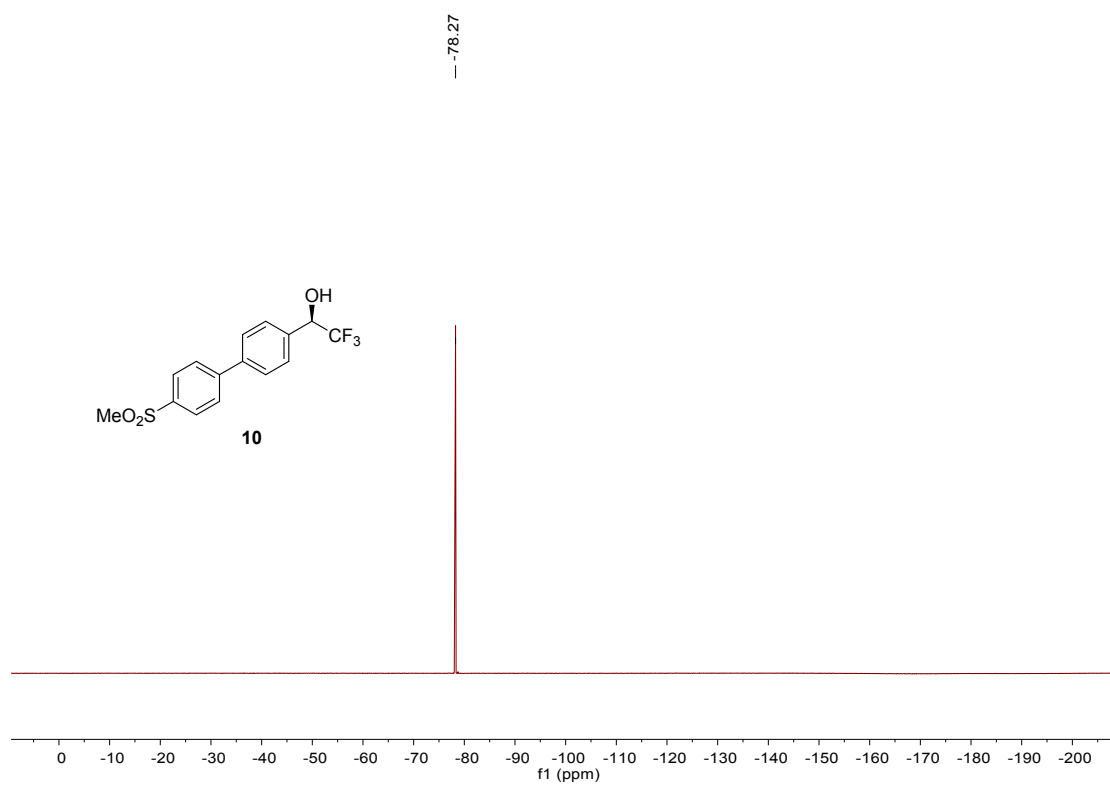

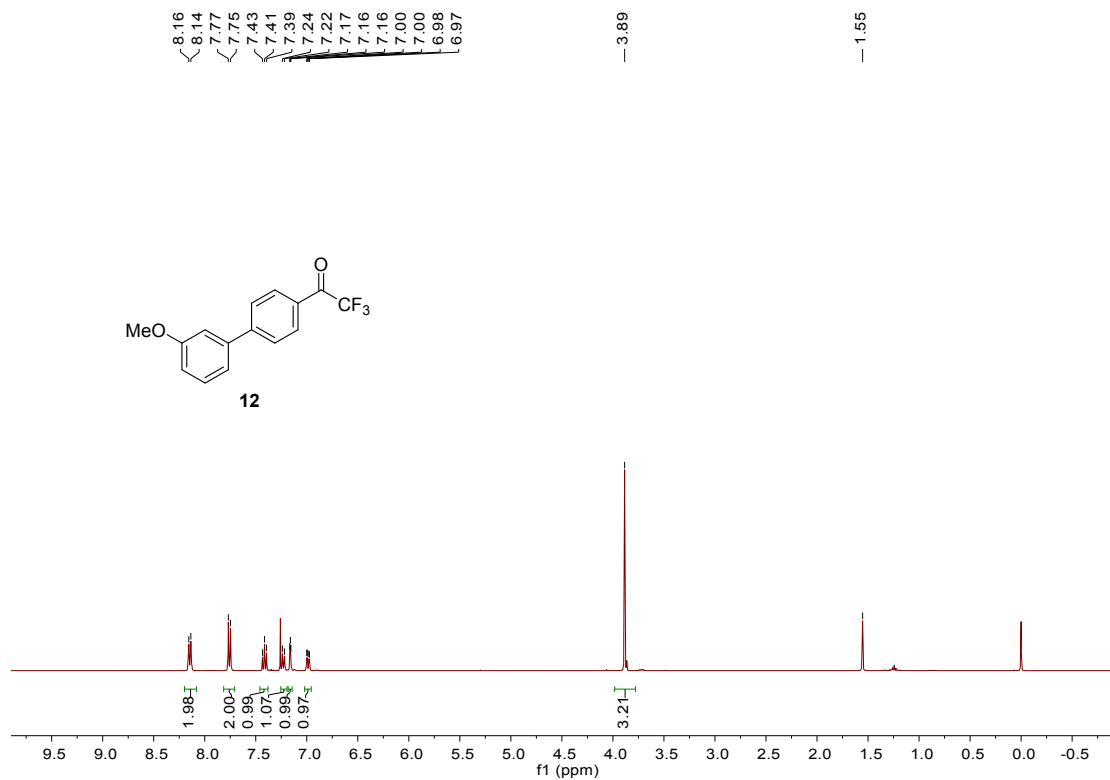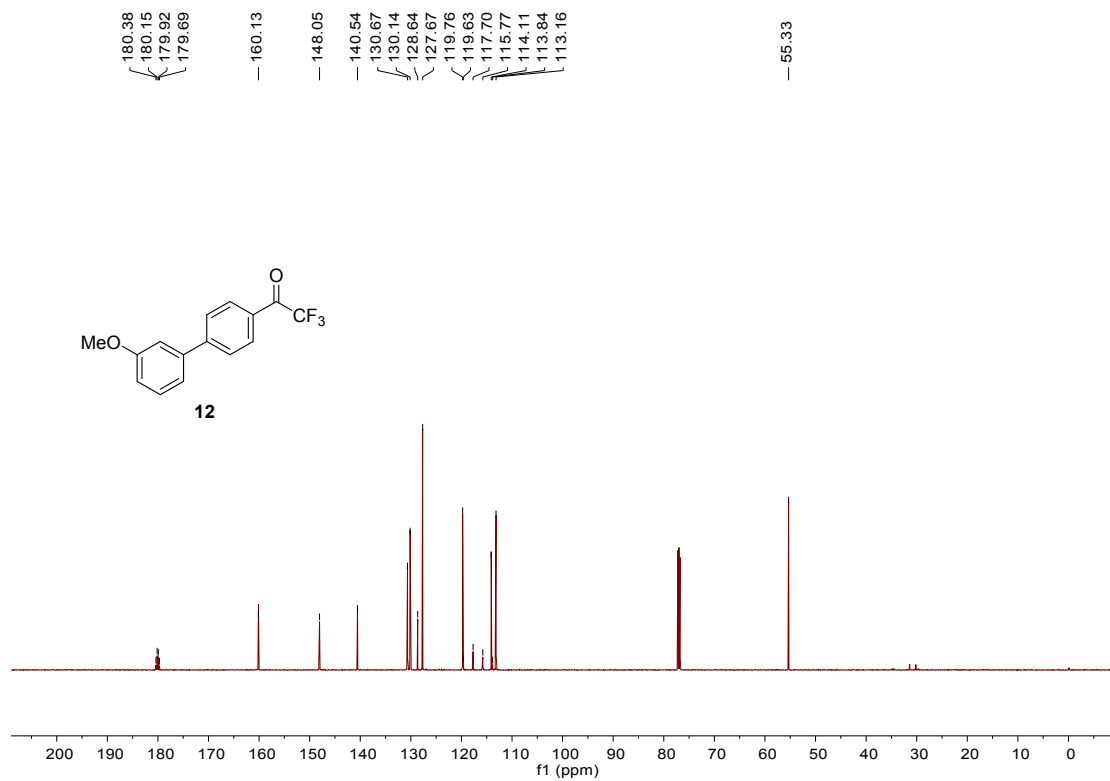

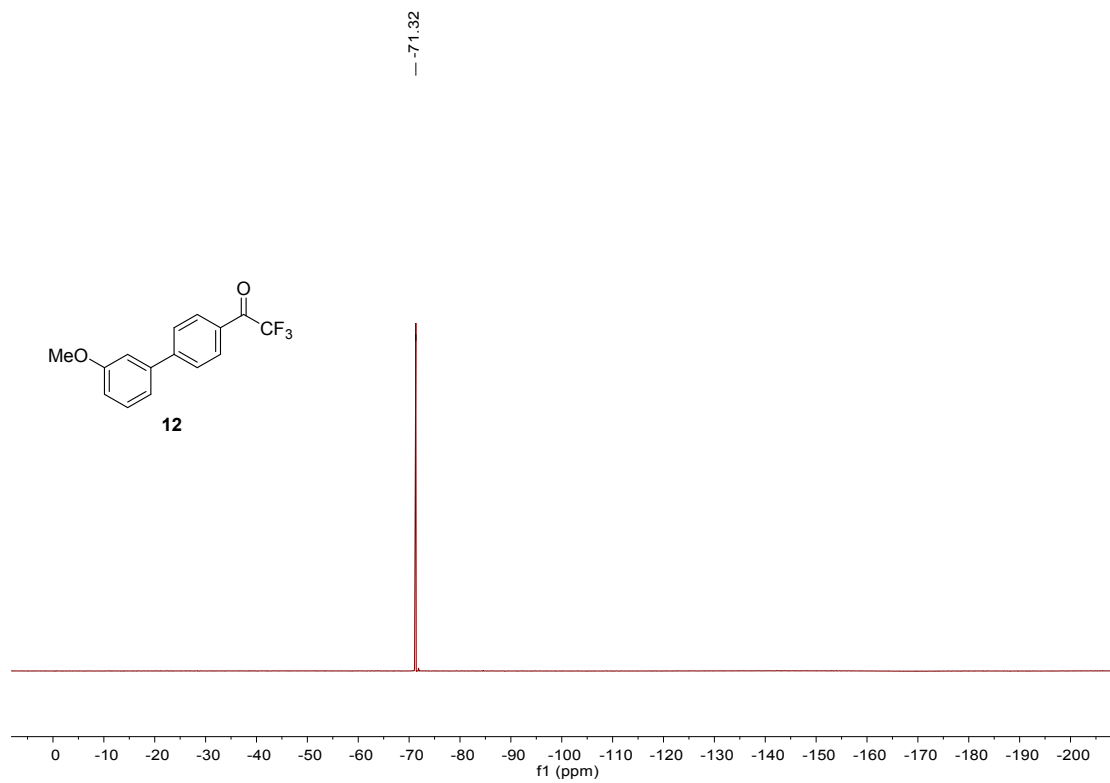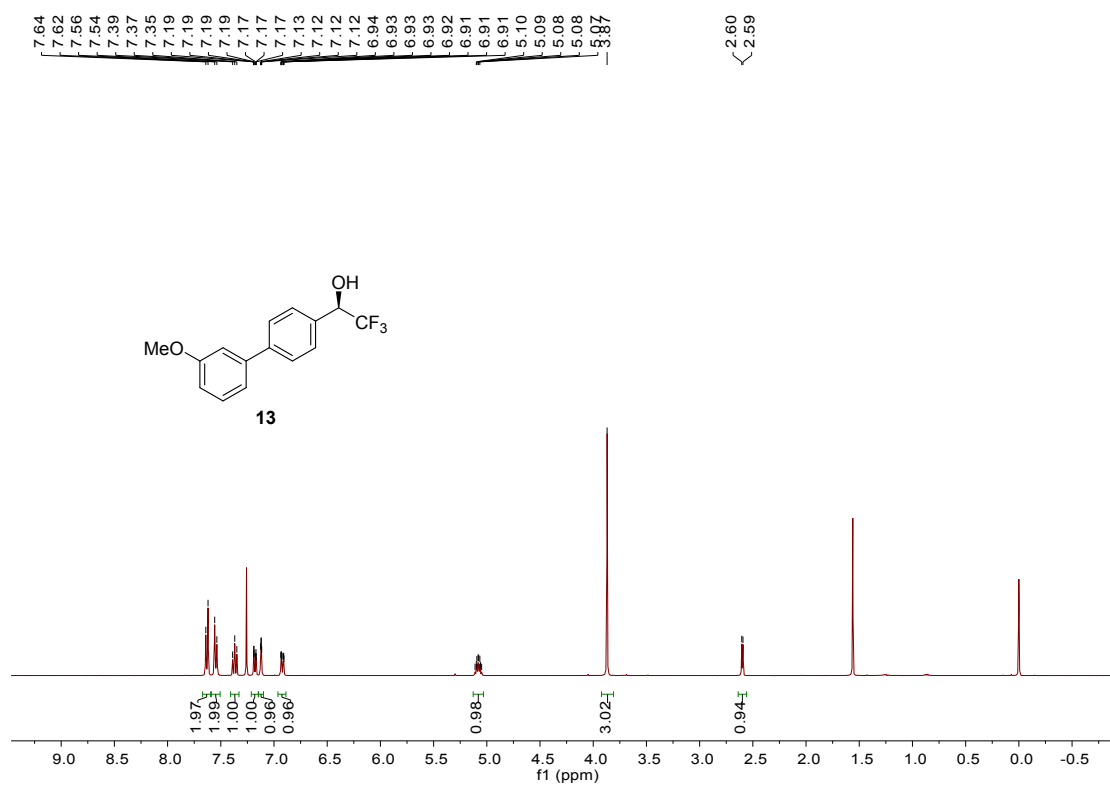

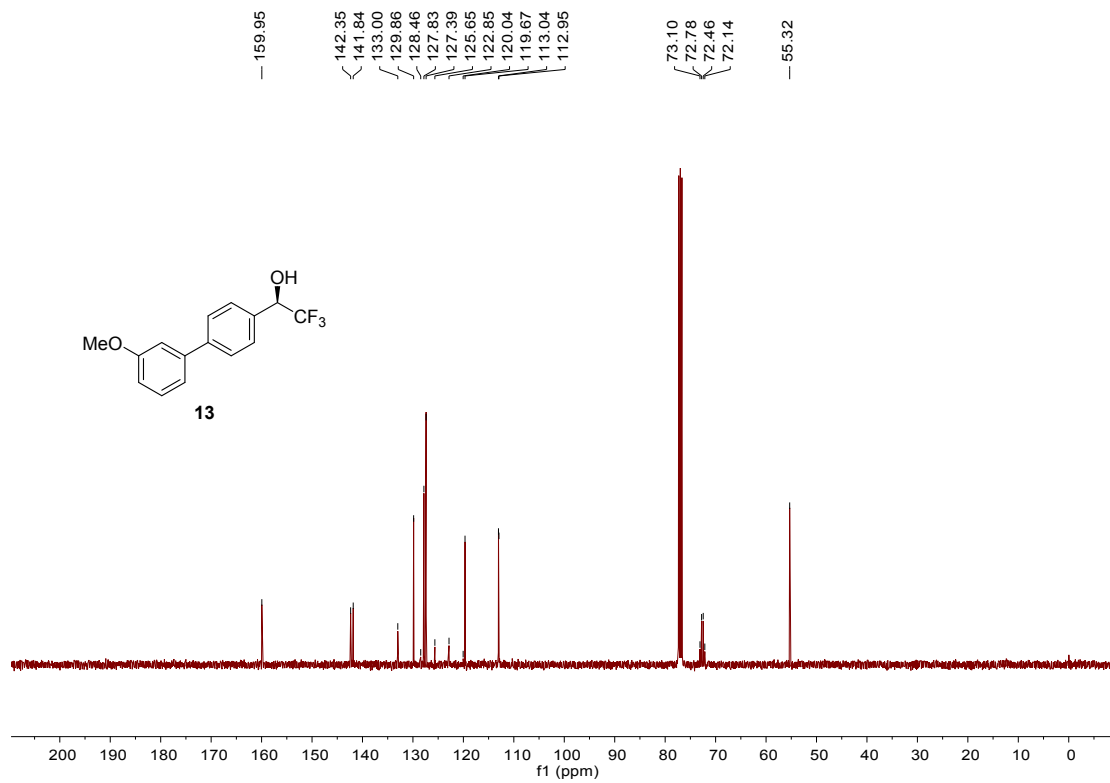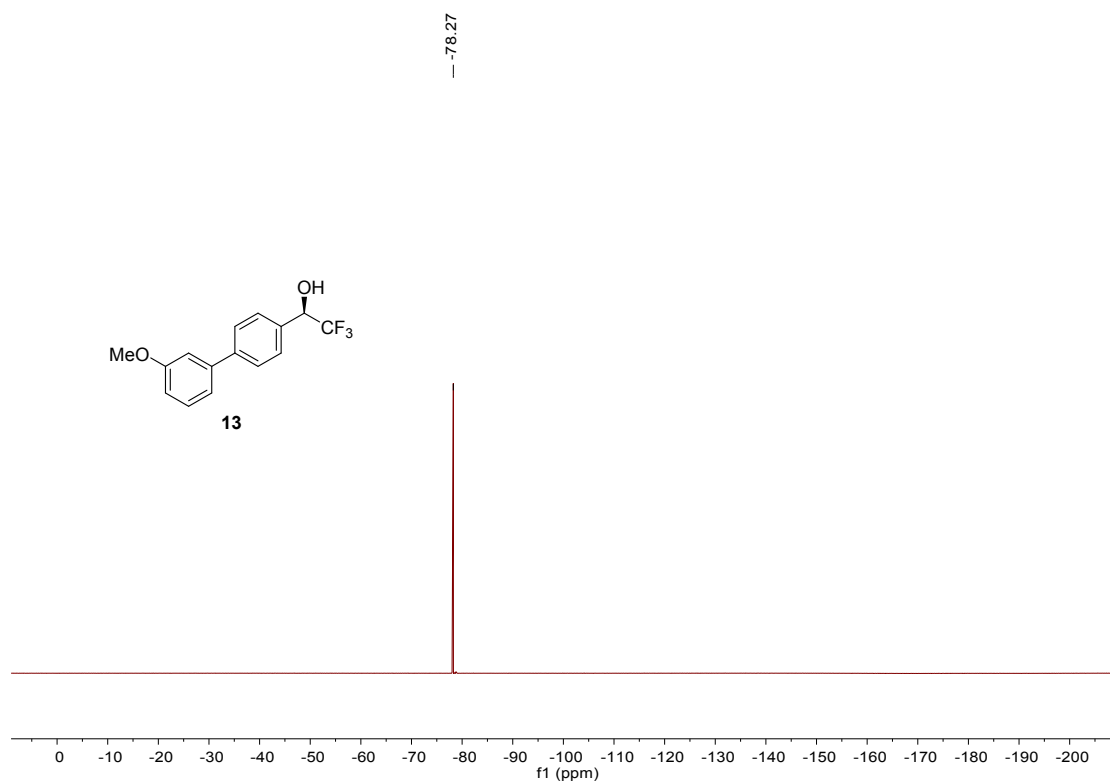

Supplement: d1qo00368b1.pdf [file d1qo00368b1.pdf]
